# Supplementary material
Source: PubMed Central journal article supplement (PMC7377237)
Supplement: ehp6664.s001.acco.pdf [file ehp6664.s001.acco.pdf]

**Note to readers with disabilities:** *EHP* strives to ensure that all journal content is accessible to all readers. However, some figures and Supplemental Material published in *EHP* articles may not conform to [508 standards](#) due to the complexity of the information being presented. If you need assistance accessing journal content, please contact [ehp508@niehs.nih.gov](mailto:ehp508@niehs.nih.gov). Our staff will work with you to assess and meet your accessibility needs within 3 working days.

### **Supplemental Material**

#### **Cytotoxicity Burst? Differentiating Specific from Nonspecific Effects in Tox21 *in Vitro* Reporter Gene Assays**

Beate I. Escher, Luise Henneberger, Maria König, Rita Schlichting, and Fabian C. Fischer

#### **Table of Contents**

**Text S1.** MATLAB code 1: Processing and sorting of Tox21 concentration-response browser data.

**Text S2.** MATLAB code 2: Calculation of IC<sub>10</sub> and EC<sub>10</sub> from the Tox21 concentration-response data.

**Table S1.** Additional information on test chemicals.

**Table S2.** Analysis of the specific effects of the baseline toxicants in AREc32.

**Table S3.** Analysis of the specific effects of the baseline toxicants in ARE-BLA.

**Table S4.** Analysis of the specific effects of the baseline toxicants in AhR-CALUX.

**Table S5.** Analysis of the specific effects of the baseline toxicants in PPAR $\gamma$ -BLA.

**Table S6.** Analysis of the specific effects of the baseline toxicants in AR-BLA.

**Table S7.** Analysis of the specific effects of the baseline toxicants in ER $\alpha$ -BLA.

**Table S8.** Analysis of the specific effects of the baseline toxicants in PR-BLA.

**Table S9.** Analysis of the specific effects of the baseline toxicants in GR-BLA.

**Table S10.** Analysis of the specific effects of the environmental chemicals in AREc32.

**Table S11.** Analysis of the specific effects of the environmental chemicals in ARE-BLA.

**Table S12.** Analysis of the specific effects of the environmental chemicals in AhR-CALUX.

**Table S13.** Analysis of the specific effects of the environmental chemicals in PPAR $\gamma$ -BLA.

**Table S14.** Analysis of the specific effects of the environmental chemicals in AR-BLA.

**Table S15.** Analysis of the specific effects of the environmental chemicals in ER $\alpha$ -BLA.

**Table S16.** Analysis of the specific effects of the environmental chemicals in PR-BLA.

**Table S17.** Analysis of the specific effects of the environmental chemicals in GR-BLA.

**Table S18.** Analysis given in Table 2 split into the two subsets of neutral ( $f_{\text{neutral}} > 98\%$ ) and (partially) charged ( $f_{\text{neutral}} < 98\%$ ) chemicals.

**Figure S1.** Concentration-cytotoxicity and concentration-effect relationships of the confirmed baseline toxicants in AREc32.

**Figure S2.** Concentration-cytotoxicity and concentration-effect relationships of the confirmed baseline toxicants in ARE-BLA.

**Figure S3.** Concentration-cytotoxicity and concentration-effect relationships of the confirmed baseline toxicants in AhR-CALUX.

**Figure S4.** Concentration-cytotoxicity and concentration-effect relationships of the confirmed baseline toxicants in PPAR $\gamma$ -BLA.

**Figure S5.** Concentration-cytotoxicity and concentration-effect relationships of the confirmed baseline toxicants in AR-BLA.

**Figure S6.** Concentration-cytotoxicity and concentration-effect relationships of the confirmed baseline toxicants in ER $\alpha$ -BLA.

**Figure S7.** Concentration-cytotoxicity and concentration-effect relationships of the confirmed baseline toxicants in PR-BLA.

**Figure S8.** Concentration-cytotoxicity and concentration-effect relationships of the confirmed baseline toxicants in GR-BLA.

**Figure S9.** Concentration-cytotoxicity and concentration-effect relationships of the environmental chemicals in AREc32.

**Figure S10.** Concentration-cytotoxicity and concentration-effect relationships of the environmental chemicals in ARE-BLA.

**Figure S11.** Concentration-cytotoxicity and concentration-effect relationships of the environmental chemicals in AhR-CALUX.

**Figure S12.** Concentration-cytotoxicity and concentration-effect relationships of the environmental chemicals in PPAR $\gamma$ -BLA.

**Figure S13.** Concentration-cytotoxicity and concentration-effect relationships of the environmental chemicals in AR-BLA.

**Figure S14.** Concentration-cytotoxicity and concentration-effect relationships of the environmental chemicals in ER $\alpha$ -BLA.

**Figure S15.** Concentration-cytotoxicity and concentration-effect relationships of the environmental chemicals in PR-BLA.

**Figure S16.** Concentration-cytotoxicity and concentration-effect relationships of the environmental chemicals in GR-BLA.

**Figure S17.** Cytotoxicity of the additional seven chemicals in relation to the Quantitative Structure Activity Relationships (QSAR) for baseline toxicity for all cell lines.

**Figure S18.** Workflow for the analysis of the Tox21 data.

**Figure S19.** Cytotoxicity of the seven environmental chemicals (Bisphenol A, Quinoxifen, Fluoranthene, Genistein, Coumarin, 8-Gingerol, Zingerone) in relation to the QSARs for baseline toxicity for all cell lines.

**Figure S20.** Comparison of the toxic ratio (TR) analysis of the entire dataset (legend “all”, data from Figure 4A) in comparison to the two subsets of neutral ( $f_{\text{neutral}} > 98\%$ ) and (partially) charged ( $f_{\text{neutral}} < 98\%$ ) chemicals.

**Figure S21.** Comparison EC<sub>10</sub> derived from the results of the individual Tox21 laboratories (black dots) compared to the joint data evaluation of all data (red diamonds) of a given chemical in this study. Selected examples are depicted for ER $\alpha$ -BLA. They demonstrate that the joint evaluation is reasonable.

**Figure S22.** Comparison between the IC<sub>10</sub>/EC<sub>10</sub> values measured in the present study and the corresponding chemicals/assays in Tox21.

**Figure S23.** Ratio between the IC<sub>10</sub> and EC<sub>10</sub> values measured in the present study and the corresponding chemicals/assays in Tox21.

## References

**Additional File-** Excel Document

### Text S1. MATLAB code 1: Processing and sorting of Tox21 concentration-response browser data

%This is the script to transform the .csv files downloaded from the Tox21 concentration-response browser into individual .csv files containing the data for each chemical for further data analysis

```
clear all;
M = readtable('!.csv file downloaded from the browser.csv');
outputByName = containers.Map;
input = M;
[rowCount, ] = size(input);
chemNameIndex = 1;

% Now we look at each file independently
for row = 1:rowCount
% Identify Chemical name as input
    chemName = input{row,chemNameIndex};
    name = string(chemName);
    key=char(name);
    if isKey(outputByName, key)
% Now we extract concentration, effect and CAS-Number
        outputByName(key) = [outputByName(key); input(row, 2:5)];
    else
        outputByName(key) = input(row, 2:5);
    end
end
allKeys = keys(outputByName);
keyCount = size(allKeys,2);

% This loop writes the independent csv. files
for keyIndex = 1:keyCount
    key = allKeys{keyIndex};
    outputTable = outputByName(key);
% Now we write files named by the chemical and save them in the workspace
    writetable(outputTable, filename);
end
```

**Text S2. MATLAB code 2: Calculation of IC<sub>10</sub> and EC<sub>10</sub> from the Tox21 concentration-response data**

%This is the script to fit the cell viability and activity data yielding EC10 and IC10 values with standard errors and maximum concentrations considered in the fit. The code first excludes all values for cytotoxicity >50% effect and all >30% activity effects. Then, linear regression is fitted and with resulting slopes. The IC10 and EC10 are then 0.1/slope.

```
clear all;
pathxls='add path containing individual .csv files from Code 1';
d=uigetdir('add path containing individual .csv files from Code 1');
cd(d);
pr=dir('*.xls');
names={pr.name};
% First, we need to create empty matrices for the values we want to calculate that we can later fill with
data
IC10 = [];
EC10 = [];
SE_IC10 = [];
SE_EC10 = [];
CAS = [];
Max_conc_EC10 = [];
Max_conc_IC10 = [];

for NameIndex=1:length(names)
    NUMERIC=readtable(names{NameIndex});
    x_viab=[ ];
    y_viab=[ ];
    x_ratio=[ ];
    y_ratio=[ ];

    for Index=1:height(NUMERIC)
        experiment=string(NUMERIC{Index,1});
        if startsWith(experiment, 'ratio')
            if NUMERIC{Index, 3} < 30
                x_ratio = [x_ratio;NUMERIC{Index, 2}];
                y_ratio = [y_ratio;NUMERIC{Index, 3}];
            end
        elseif startsWith(experiment, 'via')
            if NUMERIC{Index, 3} < 50
                x_viab = [x_viab;NUMERIC{Index, 2}];
```

```
y_viab = [y_viab; NUMERIC{Index, 3}];
end
else
    disp('Experiment not recognized')
end
end
x_viabdelog = 10.^x_viab*1000000;
x_ratiodelog = 10.^x_ratio*1000000;
y_viabdelog = y_viab;
y_ratiodelog = y_ratio;
b_viab = x_viabdelog\y_viabdelog;
b_ratio = x_ratiodelog\y_ratiodelog;
y_viabfit = x_viabdelog*b_viab;
y_ratiosfit = x_ratiodelog*b_ratio;
r_viab = y_viabdelog-y_viabfit;
r_ratio = y_ratiodelog-y_ratiosfit;
n_viab = length(x_viabdelog);
n_ratio = length(x_ratiodelog);
SSE_viab = sum(r_viab.^2);
SSE_ratio = sum(r_ratio.^2);
MSE_viab=SSE_viab/(n_viab-1);
MSE_ratio=SSE_ratio/(n_ratio-1);
SE_viab = sqrt(MSE_viab/sum(x_viabdelog.^2));
SE_ratio = sqrt(MSE_ratio/sum(x_ratiodelog.^2));
SE_IC10 = [SE_IC10; 10/b_viab^2*SE_viab];
SE_EC10 = [SE_EC10; 10/b_ratio^2*SE_ratio];
IC10 = [IC10; 10/b_viab];
EC10 = [EC10; 10/b_ratio];
CAS = [CAS; NUMERIC{1,4}]
Max_conc_EC10 = [Max_conc_EC10; max(x_ratiodelog)];
Max_conc_IC10 = [Max_conc_IC10; max(x_viabdelog)];
end

Output = table(transpose(names), CAS, IC10, SE_IC10, EC10, SE_EC10, Max_conc_EC10,
Max_conc_IC10);
writetable(Output, 'define output sheet name here.xls');
```

**Table S1. Additional information on test chemicals.**

| Chemical                            | CAS Number  | DSSTox         | $f_{\text{neutral}}$ | $\log K_{\text{ip/w}}$ or<br>$\log D_{\text{lip/w}}$ (pH 7.4)<br>[L/L] | Source        | Purity                              |
|-------------------------------------|-------------|----------------|----------------------|------------------------------------------------------------------------|---------------|-------------------------------------|
| 2-Phenylphenol                      | 90-43-7     | DTXSID2021151  | 1.00                 | 3.46 <sup>a</sup>                                                      | Sigma Aldrich | 99.6%                               |
| 3-Nitroaniline                      | 99-09-2     | DTXSID6025725  | 1.00                 | 2.17 <sup>a</sup>                                                      | Sigma-Aldrich | 98.0%                               |
| 4-Chloro-3-methylphenol             | 59-50-7     | DTXSID4021717  | 1.00                 | 3.34 <sup>a</sup>                                                      | Sigma-Aldrich | ≥ 98%                               |
| 4-Pentylphenol <sup>b</sup>         | 14938-35-3  | DTXSID9044164  | 1.00                 | 4.31 <sup>a</sup>                                                      | Sigma-Aldrich | ≥ 98%                               |
| 2-Allylphenol                       | 1745-81-9   | DTXSID3022164  | 1.00                 | 3.06 <sup>a</sup>                                                      | Sigma-Aldrich | 98.0%                               |
| 2-Butoxyethanol                     | 111-76-2    | DTXSID1024097  | 1.00                 | 0.60 <sup>a</sup>                                                      | Sigma-Aldrich | ≥ 99.5%                             |
| 2,4,5-Trichloroaniline <sup>b</sup> | 636-30-6    | DTXSID5044152  | 1.00                 | 4.16 <sup>a</sup>                                                      | Sigma-Aldrich | 99.1%                               |
| Bisphenol A                         | 80-05-7     | DTXSID1048839  | 0.99                 | 3.50 <sup>c</sup>                                                      | Sigma-Aldrich | >99%                                |
| Quinoxifen                          | 124495-18-7 | DTXSID1042364  | 1.00                 | 5.32 <sup>d</sup>                                                      | Sigma-Aldrich | Pestanal,<br>analytical<br>standard |
| Fluoranthene                        | 206-44-0    | DTXSID8020628  | 1.00                 | 5.41 <sup>e</sup>                                                      | Sigma-Aldrich | 98.0%                               |
| Genistein                           | 446-72-0    | DTXSID3047849  | 0.39                 | 3.32 <sup>f</sup>                                                      | Roth          | >98%                                |
| Coumarin                            | 91-64-5     | DTXSID8041797  | 1.00                 | 2.09 <sup>d</sup>                                                      | Sigma-Aldrich | >99%                                |
| 8-Gingerol <sup>b</sup>             | 23513-08-8  | DTXSID20178078 | 1.00                 | 4.70 <sup>d</sup>                                                      | Sigma-Aldrich | >98%                                |
| Zingerone <sup>b</sup>              | 122-48-5    | DTXSID8047420  | 1.00                 | 1.97 <sup>d</sup>                                                      | Sigma-Aldrich | >96%                                |

<sup>a</sup>(Vaes et al. 1997).

<sup>b</sup>Not included in Tox21.

<sup>c</sup>(Kwon et al. 2006).

<sup>d</sup>(Henneberger et al. 2020).

<sup>e</sup>(van der Heijden and Jonker 2009).

<sup>f</sup>(Henneberger et al. 2019).



**Table S2. Analysis of the specific effects of the baseline toxicants in AREc32.**

| AREc32                  | IC <sub>10</sub> (M)     | EC <sub>IR1.5</sub> (M)  | Toxic ratio<br>TR | Specificity<br>ratio<br>SR <sub>cytotoxicity</sub> | Specificity<br>ratio<br>SR <sub>baseline</sub> |
|-------------------------|--------------------------|--------------------------|-------------------|----------------------------------------------------|------------------------------------------------|
| 2-Phenylphenol          | 9.9±0.4·10 <sup>-5</sup> | 9.5±0.4·10 <sup>-5</sup> | 2.0               | 1.0                                                | 2.1                                            |
| 3-Nitroaniline          | 1.7±0.2·10 <sup>-3</sup> | 3.8±0.2·10 <sup>-3</sup> | 0.6               | 4.3                                                | 2.8                                            |
| 4-Chloro-3-methylphenol | 1.3±0.1·10 <sup>-4</sup> | 1.4±0.1·10 <sup>-4</sup> | 1.9               | 0.9                                                | 1.7                                            |
| 4-Pentylphenol          | 7.9±0.8·10 <sup>-5</sup> | 5.0±0.2·10 <sup>-5</sup> | 0.8               | 1.6                                                | 1.3                                            |
| 2-Allylphenol           | 2.8±0.4·10 <sup>-4</sup> | 1.7±0.6·10 <sup>-4</sup> | 1.2               | 1.6                                                | 1.9                                            |
| 2-Butoxyethanol         | 9.2±0.4·10 <sup>-3</sup> | 3.0±0.6·10 <sup>-2</sup> | 0.9               | 0.3                                                | 0.3                                            |
| 2,4,5-Trichloroaniline  | 2.1±0.2·10 <sup>-4</sup> | 1.3±0.4·10 <sup>-4</sup> | 0.4               | 1.6                                                | 0.6                                            |

Note: we did not remove all concentrations above IC<sub>10</sub> as it would be normally done in such an evaluation (Escher et al. 2018) but kept more data in the linear range to extrapolate the EC<sub>IR1.5</sub> values to demonstrate the cytotoxicity burst.

Abbreviations: EC<sub>IR1.5</sub>, effect concentration causing an induction ratio IR of 1.5 (50% over control); IC<sub>10</sub>, 10% inhibitory concentration (cytotoxicity). EC<sub>IR1.5</sub> and IC<sub>10</sub> are reported as molar concentrations (M) plus/minus (±) standard error of mean (SEM), from error propagation of the SEM of the slope of the concentration-response curve.

**Table S3. Analysis of the specific effects of the baseline toxicants in ARE-BLA.**

| ARE-BLA                 | IC <sub>10</sub> (M)     | EC <sub>IR1.5</sub> (M)  | Toxic ratio<br>TR | Specificity<br>ratio<br>SR <sub>cytotoxicity</sub> | Specificity<br>ratio<br>SR <sub>baseline</sub> |
|-------------------------|--------------------------|--------------------------|-------------------|----------------------------------------------------|------------------------------------------------|
| 2-Phenylphenol          | 1.3±0.1·10 <sup>-4</sup> | 1.3±0.7·10 <sup>-4</sup> | 2.2               | 1.0                                                | 2.2                                            |
| 3-Nitroaniline          | 2.1±0.2·10 <sup>-3</sup> | 4.3±0.2·10 <sup>-4</sup> | 0.5               | 5.0                                                | 2.5                                            |
| 4-Chloro-3-methylphenol | 2.3±0.1·10 <sup>-4</sup> | no effect                | 1.0               | -                                                  | -                                              |
| 4-Pentylphenol          | 6.0±0.4·10 <sup>-5</sup> | no effect                | 1.1               | -                                                  | -                                              |
| 2-Allylphenol           | 1.2±0.5·10 <sup>-4</sup> | 5.4±0.3·10 <sup>-4</sup> | 0.3               | 2.2                                                | 0.6                                            |
| 2-Butoxyethanol         | 2.4±0.1·10 <sup>-2</sup> | 3.6±0.3·10 <sup>-4</sup> | 0.3               | 0.7                                                | 0.2                                            |
| 2,4,5-Trichloroaniline  | 1.6±0.1·10 <sup>-4</sup> | 3.3±0.1·10 <sup>-4</sup> | 0.5               | 0.5                                                | 0.2                                            |

Note: that we did not remove all concentrations above IC<sub>10</sub> as it would be normally done in such an evaluation (Escher et al. 2018) but kept more data in the linear range to extrapolate the EC<sub>IR1.5</sub> values to demonstrate the cytotoxicity burst.

Abbreviations: EC<sub>IR1.5</sub>, effect concentration causing an induction ratio IR of 1.5 (50% over control); IC<sub>10</sub>, 10% inhibitory concentration (cytotoxicity). EC<sub>IR1.5</sub> and IC<sub>10</sub> are reported as molar concentrations (M) plus/minus (±) standard error of mean (SEM), from error propagation of the SEM of the slope of the concentration-response curve. No effect: concentration-response curve did not exceed induction ratio IR 1.5.

**Table S4. Analysis of the specific effects of the baseline toxicants in AhR-CALUX.**

| AhR-CALUX               | IC <sub>10</sub> (M)     | EC <sub>10</sub> (M)     | Toxic ratio<br>TR | Specificity<br>ratio<br>SR <sub>cytotoxicity</sub> | Specificity<br>ratio<br>SR <sub>baseline</sub> |
|-------------------------|--------------------------|--------------------------|-------------------|----------------------------------------------------|------------------------------------------------|
| 2-Phenylphenol          | 1.3±0.9·10 <sup>-4</sup> | 1.3±0.4·10 <sup>-4</sup> | 1.2               | 1.0                                                | 1.2                                            |
| 3-Nitroaniline          | 4.1±0.3·10 <sup>-4</sup> | no effect                | 3.3               | -                                                  | -                                              |
| 4-Chloro-3-methylphenol | 1.6±0.4·10 <sup>-4</sup> | 1.6±0.1·10 <sup>-4</sup> | 1.2               | 1.0                                                | 1.2                                            |
| 4-Pentylphenol          | 4.9±0.3·10 <sup>-5</sup> | 1.2±0.1·10 <sup>-4</sup> | 0.8               | 0.4                                                | 0.3                                            |
| 2-Allylphenol           | 4.7±0.6·10 <sup>-4</sup> | 5.1±0.1·10 <sup>-4</sup> | 0.7               | 0.9                                                | 0.6                                            |
| 2-Butoxyethanol         | 3.8±0.9·10 <sup>-2</sup> | too variable             | 0.5               | -                                                  | -                                              |
| 2,4,5-Trichloroaniline  | 7.8±0.7·10 <sup>-5</sup> | 9.3±0.2·10 <sup>-6</sup> | 1.1               | 8.1                                                | 8.7                                            |

Note: that we did not remove all concentrations above IC<sub>10</sub> as it would be normally done in such an evaluation (Escher et al. 2018) but kept more data in the linear range to extrapolate the EC<sub>1R1.5</sub> values to demonstrate the cytotoxicity burst.

Abbreviations: EC<sub>10</sub>, effect concentration causing 10% of maximum effect; IC<sub>10</sub>, 10% inhibitory concentration (cytotoxicity). EC<sub>10</sub> and IC<sub>10</sub> are reported as molar concentrations (M) plus/minus (±) standard error of mean (SEM), from error propagation of the SEM of the slope of the concentration-response curve. No effect: concentration-response curve did not exceed 10%; too variable: concentration-response curves of different independent repeats were inconclusive because they differed too much, no EC<sub>10</sub> could be derived.

**Table S5. Analysis of the specific effects of the baseline toxicants in PPAR<sub>γ</sub>-BLA.**

| PPAR <sub>γ</sub> -BLA  | IC <sub>10</sub> (M)     | EC <sub>10</sub> (M)     | Toxic ratio<br>TR | Specificity<br>ratio<br>SR <sub>cytotoxicity</sub> | Specificity<br>ratio<br>SR <sub>baseline</sub> |
|-------------------------|--------------------------|--------------------------|-------------------|----------------------------------------------------|------------------------------------------------|
| 2-Phenylphenol          | 5.4±0.3·10 <sup>-5</sup> | no effect                | 2.2               | -                                                  | -                                              |
| 3-Nitroaniline          | -                        | no effect                | -                 | -                                                  | -                                              |
| 4-Chloro-3-methylphenol | 3.3±0.2·10 <sup>-5</sup> | 1.6±0.1·10 <sup>-5</sup> | 5.8               | 0.2                                                | 1.2                                            |
| 4-Pentylphenol          | 1.5±0.5·10 <sup>-4</sup> | 1.2±0.1·10 <sup>-4</sup> | 2.5               | 0.1                                                | 0.3                                            |
| 2-Allylphenol           | 6.4±0.3·10 <sup>-4</sup> | 5.1±0.1·10 <sup>-4</sup> | 0.5               | 1.3                                                | 0.6                                            |
| 2-Butoxyethanol         | 8.8±0.4·10 <sup>-3</sup> | no effect                | 2.2               | -                                                  | -                                              |
| 2,4,5-Trichloroaniline  | 2.6±0.7·10 <sup>-4</sup> | 9.3±0.2·10 <sup>-6</sup> | 0.3               | 28.2                                               | 8.7                                            |

Note: that we did not remove all concentrations above IC<sub>10</sub> as it would be normally done in such an evaluation (Escher et al. 2018) but kept more data in the linear range to extrapolate the EC<sub>10</sub> values to demonstrate the cytotoxicity burst.

Abbreviations: EC<sub>10</sub>, effect concentration causing 10% of maximum effect; IC<sub>10</sub>, 10% inhibitory concentration (cytotoxicity). EC<sub>10</sub> and IC<sub>10</sub> are reported as molar concentrations (M) plus/minus (±) standard error of mean (SEM), from error propagation of the SEM of the slope of the concentration-response curve. No effect: concentration-response curve did not exceed 10%.

**Table S6. Analysis of the specific effects of the baseline toxicants in AR-BLA.**

| AR-BLA                  | IC <sub>10</sub> (M)     | EC <sub>10</sub> (M) | Toxic ratio<br>TR | Specificity<br>ratio<br>SR <sub>cytotoxicity</sub> |
|-------------------------|--------------------------|----------------------|-------------------|----------------------------------------------------|
| 2-Phenylphenol          | 6.6±0.3·10 <sup>-5</sup> | too variable         | 1.3               | -                                                  |
| 3-Nitroaniline          | -                        | no effect            | -                 | -                                                  |
| 4-Chloro-3-methylphenol | 2.5±0.1·10 <sup>-5</sup> | no effect            | 7.5               | -                                                  |
| 4-Pentylphenol          | 1.4±0.1·10 <sup>-4</sup> | no effect            | 2.7               | -                                                  |
| 2-Allylphenol           | 2.2±0.1·10 <sup>-4</sup> | no effect            | 0.8               | -                                                  |
| 2-Butoxyethanol         | 1.4±0.1·10 <sup>-2</sup> | no effect            | 1.4               | -                                                  |
| 2,4,5-Trichloroaniline  | 6.9±0.5·10 <sup>-5</sup> | no effect            | 1.2               | -                                                  |

Note: that we did not remove all concentrations above IC<sub>10</sub> as it would be normally done in such an evaluation (Escher et al. 2018) but kept more data in the linear range to extrapolate the EC<sub>10</sub> values to demonstrate the cytotoxicity burst.

Abbreviations: EC<sub>10</sub>, effect concentration causing 10% of maximum effect; IC<sub>10</sub>, 10% inhibitory concentration (cytotoxicity). EC<sub>10</sub> and IC<sub>10</sub> are reported as molar concentrations (M) plus/minus (±) standard error of mean (SEM), from error propagation of the SEM of the slope of the concentration-response curve. No effect: concentration-response curve did not exceed 10% effect; too variable: concentration-response curves of different independent repeats were inconclusive because they differed too much, no EC<sub>10</sub> could be derived.

**Table S7. Analysis of the specific effects of the baseline toxicants in ER<sub>α</sub>-BLA.**

| ER <sub>α</sub> -BLA    | IC <sub>10</sub> (M)     | EC <sub>IR1.5</sub> (M)  | Toxic ratio<br>TR | Specificity<br>ratio<br>SR <sub>cytotoxicity</sub> | Specificity<br>ratio<br>SR <sub>baseline</sub> |
|-------------------------|--------------------------|--------------------------|-------------------|----------------------------------------------------|------------------------------------------------|
| 2-Phenylphenol          | 5.6±0.3·10 <sup>-5</sup> | no effect                | 1.2               | -                                                  | -                                              |
| 3-Nitroaniline          | 2.5±0.4·10 <sup>-4</sup> | no effect                | 5.6               | -                                                  | -                                              |
| 4-Chloro-3-methylphenol | 2.6±0.1·10 <sup>-5</sup> | 2.4±0.3·10 <sup>-5</sup> | 7.3               | 1.1                                                | 8.1                                            |
| 4-Pentylphenol          | 1.3±0.1·10 <sup>-5</sup> | 3.2±1.1·10 <sup>-5</sup> | 3.0               | 0.4                                                | 1.2                                            |
| 2-Allylphenol           | 4.1±0.3·10 <sup>-4</sup> | too variable             | 1.4               | -                                                  | -                                              |
| 2-Butoxyethanol         | 1.9±0.4·10 <sup>-2</sup> | too variable             | 1.0               | -                                                  | -                                              |
| 2,4,5-Trichloroaniline  | 6.3±0.3·10 <sup>-5</sup> | no effect                | 1.3               | -                                                  | -                                              |

Abbreviations: EC<sub>10</sub>, effect concentration causing 10% of maximum effect; IC<sub>10</sub>, 10% inhibitory concentration (cytotoxicity). EC<sub>10</sub> and IC<sub>10</sub> are reported as molar concentrations (M) plus/minus (±) standard error of mean (SEM), from error propagation of the SEM of the slope of the concentration-response curve. No effect: concentration-response curve did not exceed 10% effect; too variable: concentration-response curves of different independent repeats were inconclusive because the differed too much, no EC<sub>10</sub> could be derived.

**Table S8. Analysis of the specific effects of the baseline toxicants in PR-BLA.**

| PR-BLA                  | IC <sub>10</sub> (M)        | EC <sub>IR1.5</sub> (M)  | Toxic ratio<br>TR | Specificity<br>ratio<br>SR <sub>cytotoxicity</sub> | Specificity<br>ratio<br>SR <sub>baseline</sub> |
|-------------------------|-----------------------------|--------------------------|-------------------|----------------------------------------------------|------------------------------------------------|
| 2-Phenylphenol          | 5.7±0.2·10 <sup>-5</sup>    | no effect                | 2.0               | -                                                  | -                                              |
| 3-Nitroaniline          | (7.0±0.4·10 <sup>-5</sup> ) | no effect                | -                 | -                                                  | -                                              |
| 4-Chloro-3-methylphenol | 2.7±0.1·10 <sup>-5</sup>    | no effect                | 5.2               | -                                                  | -                                              |
| 4-Pentylphenol          | 3.1±0.2·10 <sup>-5</sup>    | no effect                | 0.9               | -                                                  | -                                              |
| 2-Allylphenol           | 5.2±0.3·10 <sup>-4</sup>    | no effect                | 0.4               | -                                                  | -                                              |
| 2-Butoxyethanol         | 1.4±0.1·10 <sup>-2</sup>    | 1.3±0.1·10 <sup>-2</sup> | 0.8               | 1.1                                                | 0.9                                            |
| 2,4,5-Trichloroaniline  | 9.5±0.5·10 <sup>-5</sup>    | no effect                | 0.4               | -                                                  | -                                              |

Note: that we did not remove all concentrations above IC<sub>10</sub> as it would be normally done in such an evaluation (Escher et al. 2018) but kept more data in the linear range to extrapolate the EC<sub>10</sub> values to demonstrate the cytotoxicity burst.

Abbreviations: EC<sub>10</sub>, effect concentration causing 10% of maximum effect; IC<sub>10</sub>, 10% inhibitory concentration (cytotoxicity). EC<sub>10</sub> and IC<sub>10</sub> are reported as molar concentrations (M) plus/minus (±) standard error of mean (SEM), from error propagation of the SEM of the slope of the concentration-response curve. No effect: concentration-response curve did not exceed 10% effect.

**Table S9. Analysis of the specific effects of the baseline toxicants in GR-BLA.**

| GR-BLA                  | IC <sub>10</sub> (M)        | EC <sub>IR1.5</sub> (M) | Toxic ratio<br>TR | Specificity<br>ratio<br>SR <sub>cytotoxicity</sub> |
|-------------------------|-----------------------------|-------------------------|-------------------|----------------------------------------------------|
| 2-Phenylphenol          | 4.4±0.1·10 <sup>-5</sup>    | no effect               | 1.6               | -                                                  |
| 3-Nitroaniline          | (7.3±0.3·10 <sup>-5</sup> ) | no effect               |                   | -                                                  |
| 4-Chloro-3-methylphenol | 2.4±0.1·10 <sup>-5</sup>    | no effect               | 5.9               | -                                                  |
| 4-Pentylphenol          | 2.3±0.2·10 <sup>-4</sup>    | no effect               | 1.2               | -                                                  |
| 2-Allylphenol           | 2.3±0.1·10 <sup>-4</sup>    | no effect               | 1.0               | -                                                  |
| 2-Butoxyethanol         | 1.0±0.1·10 <sup>-2</sup>    | no effect               | 1.1               | -                                                  |
| 2,4,5-Trichloroaniline  | 4.7±0.2·10 <sup>-5</sup>    | no effect               | 0.8               | -                                                  |

Note: that we did not remove all concentrations above IC<sub>10</sub> as it would be normally done in such an evaluation (Escher et al. 2018) but kept more data in the linear range to extrapolate the EC<sub>10</sub> values to demonstrate the cytotoxicity burst.

Abbreviations: EC<sub>10</sub>, effect concentration causing 10% of maximum effect; IC<sub>10</sub>, 10% inhibitory concentration (cytotoxicity). EC<sub>10</sub> and IC<sub>10</sub> are reported as molar concentrations (M) plus/minus (±) standard error of mean (SEM), from error propagation of the SEM of the slope of the concentration-response curve. No effect: concentration-response curve did not exceed 10% effect.

**Table S10. Analysis of the specific effects of the environmental chemicals in AREc32.**

| AREc32       | IC <sub>10</sub> (M)     | EC <sub>IR1.5</sub> (M)  | Toxic ratio<br>TR | Specificity<br>ratio<br>SR <sub>cytotoxicity</sub> | Specificity<br>ratio<br>SR <sub>baseline</sub> |
|--------------|--------------------------|--------------------------|-------------------|----------------------------------------------------|------------------------------------------------|
| Bisphenol A  | 7.2±05·10 <sup>-5</sup>  | 4.9±0.2·10 <sup>-5</sup> | 2.8               | 1.5                                                | 4.0                                            |
| Quinoxifen   | 2.1±0.2·10 <sup>-5</sup> | 1.5±0.2·10 <sup>-5</sup> | 1.9               | 1.5                                                | 1.3                                            |
| Fluoranthene | 8.5±1.1·10 <sup>-5</sup> | 5.6±0.5·10 <sup>-5</sup> | 0.2               | 1.5                                                | 0.3                                            |
| Genistein    | 2.1±0.3·10 <sup>-4</sup> | 5.3±0.3·10 <sup>-6</sup> | 1.1               | 38                                                 | 47                                             |
| Coumarin     | 2.3±0.5·10 <sup>-3</sup> | 5.6±0.2·10 <sup>-4</sup> | 0.7               | 4.2                                                | 2.1                                            |
| 8-Gingerol   | 6.1±0.4·10 <sup>-5</sup> | no effect                | 0.3               | -                                                  | -                                              |
| Zingerone    | 1.5±0.8·10 <sup>-3</sup> | 4.8±0.3·10 <sup>-4</sup> | 0.5               | 3.0                                                | 2.9                                            |

Note: we did not remove all concentrations above IC<sub>10</sub> as it would be normally done in such an evaluation (Escher et al. 2018) but kept more data in the linear range to extrapolate the EC<sub>IR1.5</sub> values to demonstrate the cytotoxicity burst.

Abbreviations: EC<sub>IR1.5</sub>, effect concentration causing an induction ratio IR of 1.5 (50% over control); IC<sub>10</sub>, 10% inhibitory concentration (cytotoxicity). EC<sub>IR1.5</sub> and IC<sub>10</sub> are reported as molar concentrations (M) plus/minus (±) standard error of mean (SEM), from error propagation of the SEM of the slope of the concentration-response curve. No effect: concentration-response curve did not exceed an induction ratio IR of 1.5.

**Table S11. Analysis of the specific effects of the environmental chemicals in ARE-BLA.**

| ARE-BLA      | IC <sub>10</sub> (M)     | EC <sub>IR1.5</sub> (M)  | Toxic ratio<br>TR | Specificity<br>ratio<br>SR <sub>cytotoxicity</sub> | Specificity<br>ratio<br>SR <sub>baseline</sub> |
|--------------|--------------------------|--------------------------|-------------------|----------------------------------------------------|------------------------------------------------|
| Bisphenol A  | 1.3±0.1·10 <sup>-4</sup> | 1.2±0.1·10 <sup>-4</sup> | 2.9               | 1.1                                                | 2.3                                            |
| Quinoxifen   | 1.3±0.1·10 <sup>-5</sup> | 3.1±0.1·10 <sup>-5</sup> | 0.3               | 4.1                                                | 0.5                                            |
| Fluoranthene | no<br>cytotoxicity       | 1.5±0.1·10 <sup>-4</sup> | -                 | -                                                  | 0.1                                            |
| Genistein    | 3.2±0.4·10 <sup>-4</sup> | 4.0±0.2·10 <sup>-4</sup> | 1.0               | 8.3                                                | 9.0                                            |
| Coumarin     | 3.6±0.2·10 <sup>-3</sup> | 1.6±0.1·10 <sup>-3</sup> | 1.0               | 2.3                                                | 1.6                                            |
| 8-Gingerol   | 5.5±0.3·10 <sup>-5</sup> | no effect                | 0.3               | -                                                  | -                                              |
| Zingerone    | 2.8±0.2·10 <sup>-3</sup> | no effect                | 0.5               | -                                                  | -                                              |

Note: we did not remove all concentrations above IC<sub>10</sub> as it would be normally done in such an evaluation (Escher et al. 2018) but kept more data in the linear range to extrapolate the EC<sub>IR1.5</sub> values to demonstrate the cytotoxicity burst.

Abbreviations: EC<sub>IR1.5</sub>, effect concentration causing an induction ratio IR of 1.5 (50% over control); IC<sub>10</sub>, 10% inhibitory concentration (cytotoxicity). EC<sub>IR1.5</sub> and IC<sub>10</sub> are reported as molar concentrations (M) plus/minus (±) standard error of mean (SEM), from error propagation of the SEM of the slope of the concentration-response curve. No effect: concentration-response curve did not exceed an induction ratio IR of 1.5.

**Table S12. Analysis of the specific effects of the environmental chemicals in AhR-CALUX.**

| AhR-CALUX    | IC <sub>10</sub> (M)      | EC <sub>10</sub> (M)     | Toxic ratio<br>TR | Specificity<br>ratio<br>SR <sub>cytotoxicity</sub> | Specificity<br>ratio<br>SR <sub>baseline</sub> |
|--------------|---------------------------|--------------------------|-------------------|----------------------------------------------------|------------------------------------------------|
| Bisphenol A  | 1.2±0.1·10 <sup>-4</sup>  | 1.2±0.4·10 <sup>-4</sup> | 1.2               | 1.0                                                | 1.2                                            |
| Quinoxifen   | 1.8±0.1·10 <sup>-5</sup>  | no effect                | 1.1               | -                                                  | -                                              |
| Fluoranthene | 1.3±0.1·10 <sup>-4</sup>  | 1.7±0.1·10 <sup>-5</sup> | 0.049             | 7.5                                                | 0.3                                            |
| Genistein    | 3.0±0.3·10 <sup>-5</sup>  | 1.9±0.1·10 <sup>-5</sup> | 6.8               | 1.6                                                | 10.6                                           |
| Coumarin     | 8.1±0.3·10 <sup>-4</sup>  | no effect                | 2.9               | -                                                  | -                                              |
| 8-Gingerol   | 5.8±0.6·10 <sup>-5</sup>  | no effect                | 0.1               | -                                                  | -                                              |
| Zingerone    | 5.8±0.31·10 <sup>-4</sup> | 3.5±0.5·10 <sup>-4</sup> | 1.6               | 1.7                                                | 5.5                                            |

Note: we did not remove all concentrations above IC<sub>10</sub> as it would be normally done in such an evaluation (Escher et al. 2018) but kept more data in the linear range to extrapolate the EC<sub>10</sub> values to demonstrate the cytotoxicity burst.

Abbreviations: EC<sub>10</sub>, effect concentration causing 10% of maximum effect; IC<sub>10</sub>, 10% inhibitory concentration (cytotoxicity). EC<sub>10</sub> and IC<sub>10</sub> are reported as molar concentrations (M) plus/minus (±) standard error of mean (SEM), from error propagation of the SEM of the slope of the concentration-response curve. No effect: concentration-response curve did not exceed 10% effect.

**Table S13. Analysis of the specific effects of the environmental chemicals in PPAR<sub>γ</sub>-BLA.**

| PPAR <sub>γ</sub> -BLA | IC <sub>10</sub> (M)     | EC <sub>10</sub> (M)     | Toxic ratio<br>TR | Specificity<br>ratio<br>SR <sub>cytotoxicity</sub> | Specificity<br>ratio<br>SR <sub>baseline</sub> |
|------------------------|--------------------------|--------------------------|-------------------|----------------------------------------------------|------------------------------------------------|
| Bisphenol A            | 2.6±0.2·10 <sup>-5</sup> | no effect                | 4.2               | -                                                  | -                                              |
| Quinoxifen             | 1.8±0.2·10 <sup>-5</sup> | 7.1±0.1·10 <sup>-7</sup> | 1.0               | 25.4                                               | 10.8                                           |
| Fluoranthene           | no<br>cytotoxicity       | 1.3±0.7·10 <sup>-5</sup> | -                 | -                                                  | 0.5                                            |
| Genistein              | 2.3±0.1·10 <sup>-5</sup> | no effect                | 6.3               | -                                                  | -                                              |
| Coumarin               | 2.3±0.2·10 <sup>-3</sup> | 8.6±0.1·10 <sup>-4</sup> | 0.6               | 1.5                                                | 1.0                                            |
| 8-Gingerol             | 4.6±0.3·10 <sup>-5</sup> | no effect                | 0.2               | -                                                  | -                                              |
| Zingerone              | 8.7±0.3·10 <sup>-4</sup> | no effect                | 0.6               | -                                                  | -                                              |

Note: we did not remove all concentrations above IC<sub>10</sub> as it would be normally done in such an evaluation (Escher et al. 2018) but kept more data in the linear range to extrapolate the EC<sub>10</sub> values to demonstrate the cytotoxicity burst.

Abbreviations: EC<sub>10</sub>, effect concentration causing 10% of maximum effect; IC<sub>10</sub>, 10% inhibitory concentration (cytotoxicity). EC<sub>10</sub> and IC<sub>10</sub> are reported as molar concentrations (M) plus/minus (±)

standard error of mean (SEM), from error propagation of the SEM of the slope of the concentration-response curve. No effect: concentration-response curve did not exceed 10% effect.

**Table S14. Analysis of the specific effects of the environmental chemicals in AR-BLA.**

| AR-BLA       | IC <sub>10</sub> (M)      | EC <sub>IR1.5</sub> (M) | Toxic ratio<br>TR | Specificity<br>ratio<br>SR <sub>cytotoxicity</sub> |
|--------------|---------------------------|-------------------------|-------------------|----------------------------------------------------|
| Bisphenol A  | 2.2±0.1·10 <sup>-5</sup>  | no effect               | 3.5               | -                                                  |
| Quinoxifen   | 2.12±0.4·10 <sup>-5</sup> | no effect               | 0.4               | -                                                  |
| Fluoranthene | no<br>cytotoxicity        | no effect               | -                 | -                                                  |
| Genistein    | 2.5±0.1·10 <sup>-5</sup>  | no effect               | 4.3               | -                                                  |
| Coumarin     | 2.9±0.6·10 <sup>-3</sup>  | no effect               | 0.5               | -                                                  |
| 8-Gingerol   | 1.3±0.8·10 <sup>-5</sup>  | no effect               | 0.3               | -                                                  |
| Zingerone    | 1.3±0.9·10 <sup>-3</sup>  | no effect               | 0.4               | -                                                  |

Note: we did not remove all concentrations above IC<sub>10</sub> as it would be normally done in such an evaluation (Escher et al. 2018) but kept more data in the linear range to extrapolate the EC<sub>10</sub> values to demonstrate the cytotoxicity burst.

Abbreviations: EC<sub>10</sub>, effect concentration causing 10% of maximum effect; IC<sub>10</sub>, 10% inhibitory concentration (cytotoxicity). EC<sub>10</sub> and IC<sub>10</sub> are reported as molar concentrations (M) plus/minus (±) standard error of mean (SEM), from error propagation of the SEM of the slope of the concentration-response curve. No effect: concentration-response curve did not exceed 10% effect.



**Table S15. Analysis of the specific effects of the environmental chemicals in ER $\alpha$ -BLA.**

| ER $\alpha$ -BLA | IC <sub>10</sub> (M)     | EC <sub>IR1.5</sub> (M)  | Toxic ratio<br>TR | Specificity<br>ratio<br>SR <sub>cytotoxicity</sub> | Specificity<br>ratio<br>SR <sub>baseline</sub> |
|------------------|--------------------------|--------------------------|-------------------|----------------------------------------------------|------------------------------------------------|
| Bisphenol A      | 2.2±0.8·10 <sup>-5</sup> | 2.2±0.1·10 <sup>-7</sup> | 2.9               | 98                                                 | 282                                            |
| Quinoxifen       | 2.2±0.2·10 <sup>-5</sup> | 4.8±0.4·10 <sup>-6</sup> | 0.3               | 4.7                                                | 0.5                                            |
| Fluoranthene     | 3.0±0.2·10 <sup>-5</sup> | 6.4±0.1·10 <sup>-6</sup> | 0.1               | 4.7                                                | 0.3                                            |
| Genistein        | 2.3±0.1·10 <sup>-4</sup> | 2.0±0.1·10 <sup>-7</sup> | 3.7               | 118                                                | 441                                            |
| Coumarin         | 1.2±0.1·10 <sup>-3</sup> | no effect                | 0.9               | -                                                  | -                                              |
| 8-Gingerol       | 1.1±0.1·10 <sup>-5</sup> | no effect                | 0.3               | -                                                  | -                                              |
| Zingerone        | 8.4±0.3·10 <sup>-3</sup> | 1.3±0.1·10 <sup>-4</sup> | 0.5               | 6.5                                                | 7.0                                            |

Note: we did not remove all concentrations above IC<sub>10</sub> as it would be normally done in such an evaluation (Escher et al. 2018) but kept more data in the linear range to extrapolate the EC<sub>10</sub> values to demonstrate the cytotoxicity burst.

Abbreviations: EC<sub>10</sub>, effect concentration causing 10% of maximum effect; IC<sub>10</sub>, 10% inhibitory concentration (cytotoxicity). EC<sub>10</sub> and IC<sub>10</sub> are reported as molar concentrations (M) plus/minus (±) standard error of mean (SEM), from error propagation of the SEM of the slope of the concentration-response curve. No effect: concentration-response curve did not exceed 10% effect.

**Table S16. Analysis of the specific effects of the environmental chemicals in PR-BLA.**

| PR-BLA       | IC <sub>10</sub> (M)     | EC <sub>IR1.5</sub> (M) | Toxic ratio<br>TR | Specificity<br>ratio<br>SR <sub>cytotoxicity</sub> |
|--------------|--------------------------|-------------------------|-------------------|----------------------------------------------------|
| Bisphenol A  | 2.4±0.1·10 <sup>-5</sup> | no effect               | 6.1               | -                                                  |
| Quinoxifen   | 1.1±0.1·10 <sup>-5</sup> | no effect               | 1.9               | -                                                  |
| Fluoranthene | no cytotoxicity          | no effect               |                   | -                                                  |
| Genistein    | 1.3±0.1·10 <sup>-5</sup> | no effect               | 14.9              | -                                                  |
| Coumarin     | 8.3±0.3·10 <sup>-4</sup> | no effect               | 2.3               | -                                                  |
| 8-Gingerol   | 7.9±0.1·10 <sup>-6</sup> | no effect               | 1.2               | -                                                  |
| Zingerone    | 8.7±0.5·10 <sup>-4</sup> | no effect               | 0.9               | -                                                  |

Note: that we did not remove all concentrations above IC<sub>10</sub> as it would be normally done in such an evaluation (Escher et al. 2018) but kept more data in the linear range to extrapolate the EC<sub>10</sub> values to demonstrate the cytotoxicity burst.

Abbreviations: EC<sub>10</sub>, effect concentration causing 10% of maximum effect; IC<sub>10</sub>, 10% inhibitory concentration (cytotoxicity). EC<sub>10</sub> and IC<sub>10</sub> are reported as molar concentrations (M) plus/minus (±) standard error of mean (SEM), from error propagation of the SEM of the slope of the concentration-response curve. No effect: concentration-response curve did not exceed 10% effect.

**Table S17. Analysis of the specific effects of the environmental chemicals in GR-BLA.**

| GR-BLA       | IC <sub>10</sub> (M)     | EC <sub>IR1.5</sub> (M) | Toxic ratio<br>TR | Specificity<br>ratio<br>SR <sub>cytotoxicity</sub> |
|--------------|--------------------------|-------------------------|-------------------|----------------------------------------------------|
| Bisphenol A  | 1.6±0.1·10 <sup>-5</sup> | no effect               | 5.5               | -                                                  |
| Quinoxifen   | 1.0±0.1·10 <sup>-5</sup> | no effect               | 1.2               | -                                                  |
| Fluoranthene | 3.0±0.3·10 <sup>-5</sup> | no effect               | 0.1               | -                                                  |
| Genistein    | 1.2±0.1·10 <sup>-5</sup> | no effect               | 9.8               | -                                                  |
| Coumarin     | 6.6±0.2·10 <sup>-4</sup> | no effect               | 1.9               | -                                                  |
| 8-Gingerol   | 7.9±0.2·10 <sup>-6</sup> | no effect               | 0.7               | -                                                  |
| Zingerone    | 5.9±0.2·10 <sup>-4</sup> | no effect               | 0.8               | -                                                  |

Note: that we did not remove all concentrations above IC<sub>10</sub> as it would be normally done in such an evaluation (Escher et al. 2018) but kept more data in the linear range to extrapolate the EC<sub>10</sub> values to demonstrate the cytotoxicity burst.

Abbreviations: EC<sub>10</sub>, effect concentration causing 10% of maximum effect; IC<sub>10</sub>, 10% inhibitory concentration (cytotoxicity). EC<sub>10</sub> and IC<sub>10</sub> are reported as molar concentrations (M) plus/minus (±) standard error of mean (SEM), from error propagation of the SEM of the slope of the concentration-response curve. No effect: concentration-response curve did not exceed 10% effect.

**Table S18. Analysis given in Table 2 split into the two subsets of neutral ( $f_{neutral} > 98\%$ ) and (partially) charged ( $f_{neutral} < 98\%$ ) chemicals.**

| Reporter gene assay    | n(TR) | n(TR > 10) |         | n(neutral) | n(TR > 10) |         | n(charged) | n(TR > 10) |         |
|------------------------|-------|------------|---------|------------|------------|---------|------------|------------|---------|
| ARE-BLA                | 694   | 384        | (55.3%) | 340        | 157        | (46.2%) | 354        | 227        | (64.1%) |
| AhR-CALUX              | 930   | 524        | (56.3%) | 365        | 165        | (45.2%) | 565        | 359        | (63.5%) |
| PPAR <sub>γ</sub> -BLA | 723   | 326        | (45.1%) | 334        | 129        | (38.6%) | 389        | 197        | (50.6%) |
| AR-BLA                 | 1172  | 485        | (41.4%) | 643        | 226        | (35.1%) | 529        | 259        | (49.0%) |
| ER <sub>α</sub> -BLA   | 610   | 193        | (31.6%) | 279        | 78         | (28.0%) | 331        | 115        | (34.7%) |
| GR-BLA                 | 599   | 204        | (34.1%) | 336        | 103        | (30.7%) | 263        | 101        | (38.4%) |

Number of chemicals n for which a TR could be derived n(TR) and thereof number of neutral (n(neutral)) and charged (n(charged)) chemicals and number with TR > 10 (n(TR >10)).

**Figure S1.** Concentration-cytotoxicity and concentration-effect relationships of the confirmed baseline toxicants in AREc32.

On the left plot are all data plotted on a logarithmic concentration scale with the induction ratio of AREc32 represented in red filled symbols (left y-axis) and the cytotoxicity in empty black-rimmed symbols (right y-axis). Different symbols refer to different independent experiments. On the right are only experimental cytotoxicity data depicted that are in the linear portion of the concentration-cytotoxicity relationship (solid line) up to 40% cytotoxicity (=100% - % cell viability), from which the  $IC_{10}$  is derived (10% effect level marked by a dotted line). In the middle plot are only experimental effect data in the linear portion of the concentration-effect relationship, from which the  $EC_{IR1.5}$  is derived (IR 1.5 effect level marked by a dotted horizontal line);  $IC_{10}$ , which is normally the cut-off for evaluation of reporter gene activation, marked by a vertical dotted line.

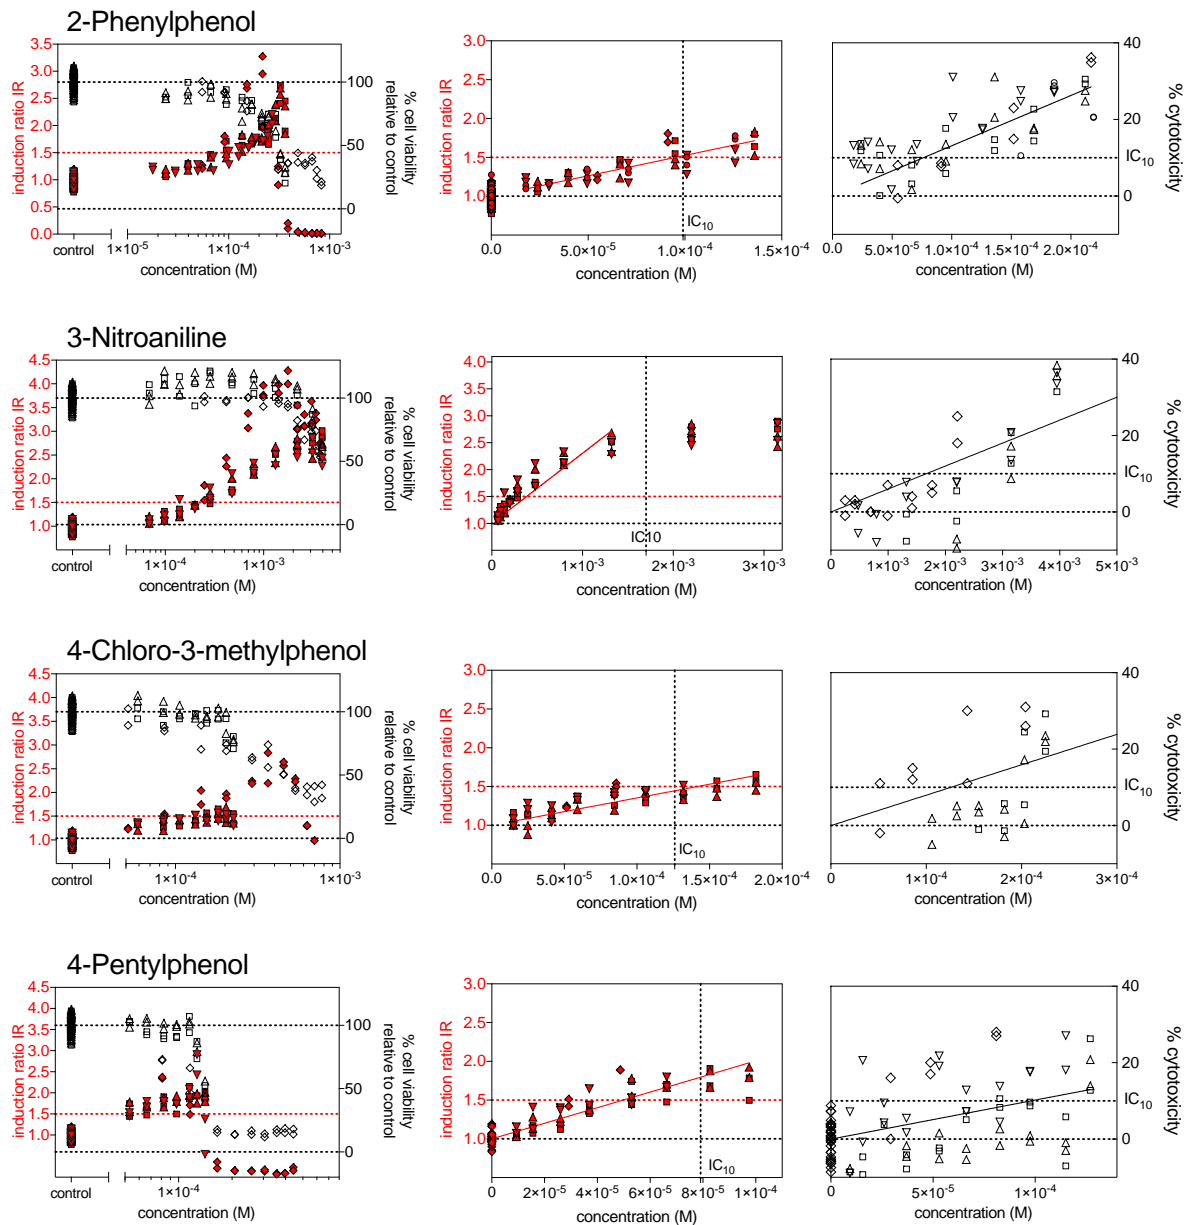

Supplementary Material  
Cytotoxicity burst? Differentiating specific from nonspecific effects in reporter gene assays

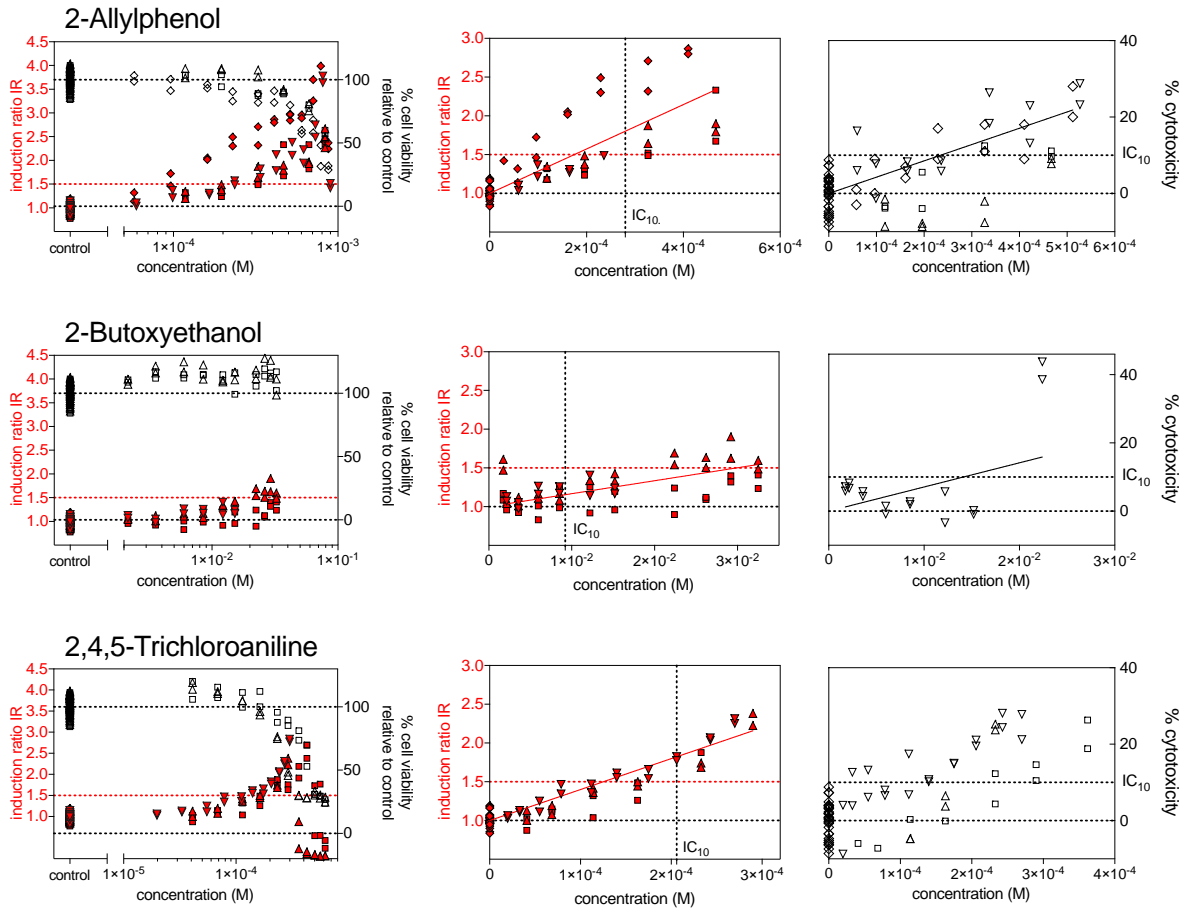

**Figure S2.** Concentration-cytotoxicity and concentration-effect relationships of the confirmed baseline toxicants in ARE-BLA.

On the left plot are all data plotted on a logarithmic concentration scale with the induction ratio of ARE-BLA represented in red filled symbols (left y-axis) and the cytotoxicity in empty black-rimmed symbols (right y-axis). Different symbols refer to different independent experiments. On the right are only experimental cytotoxicity data depicted that are in the linear portion of the concentration-cytotoxicity relationship (solid line) up to 40% cytotoxicity (=100% - % cell viability), from which the  $IC_{10}$  is derived (10% effect level marked by a dotted line). In the middle plot are only experimental effect data in the linear portion of the concentration-effect relationship, from which the  $EC_{IR1.5}$  is derived (IR 1.5 effect level marked by a dotted horizontal line);  $IC_{10}$ , which is normally the cut-off for evaluation of reporter gene activation, marked by a vertical dotted line.

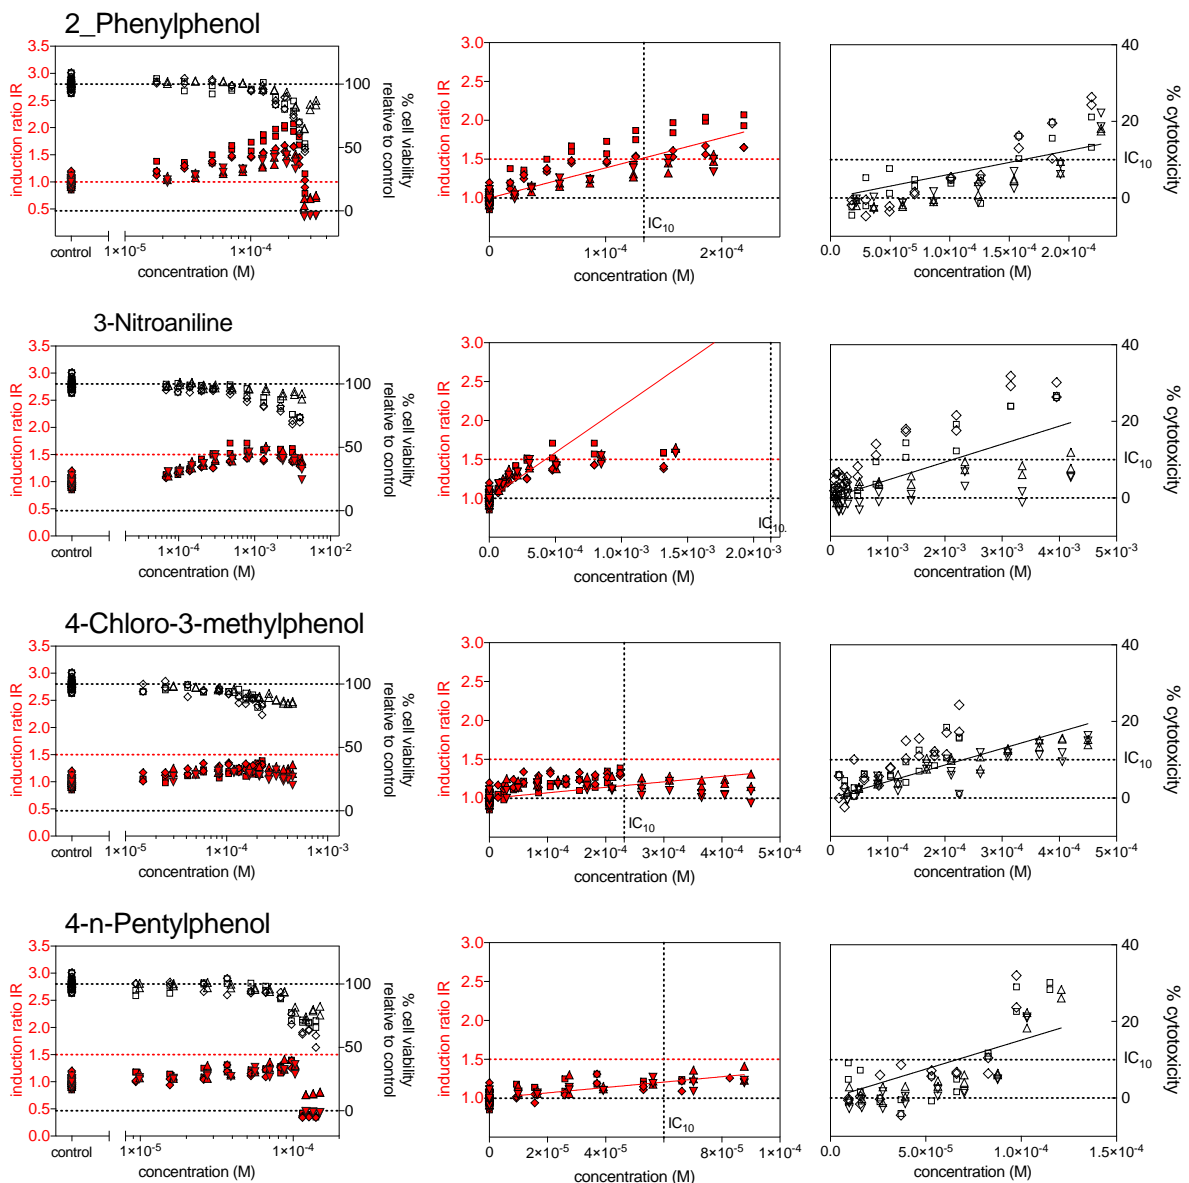

Supplementary Material  
Cytotoxicity burst? Differentiating specific from nonspecific effects in reporter gene assays

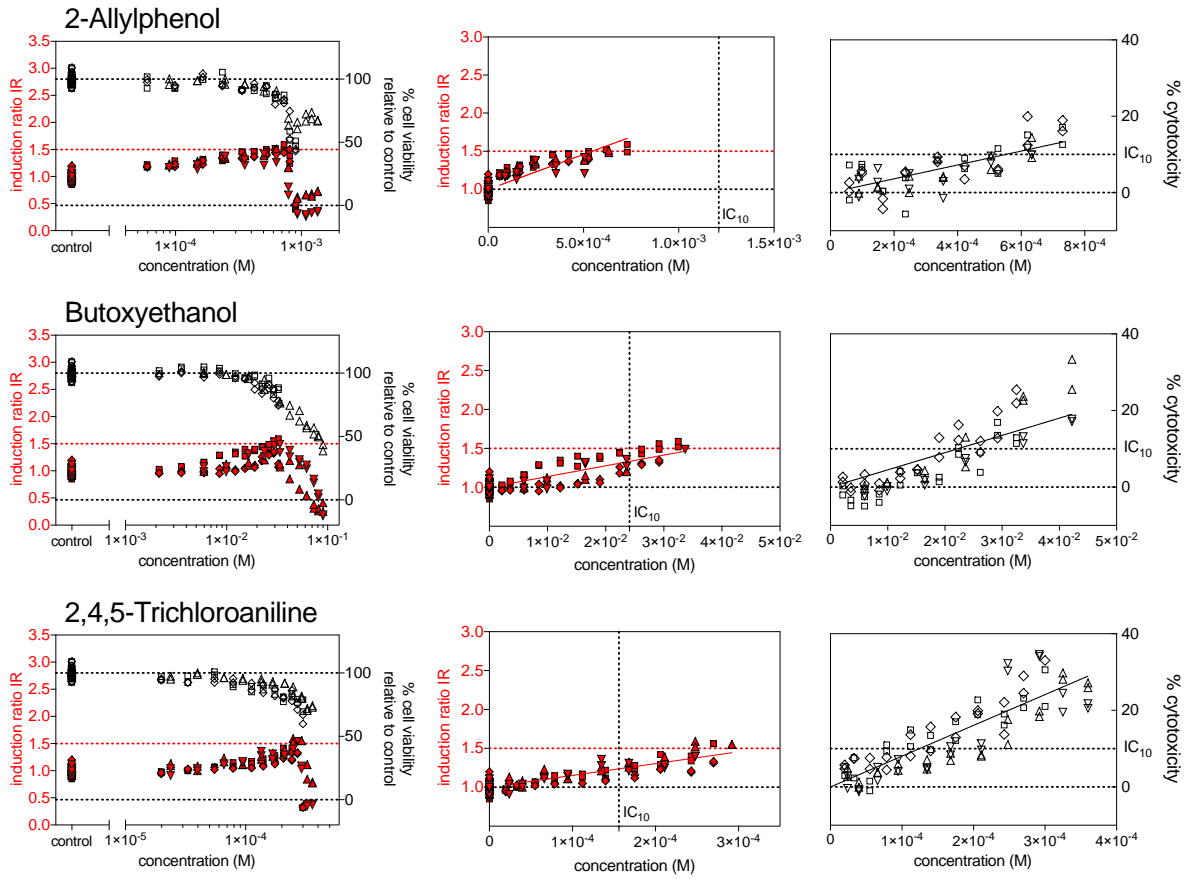

**Figure S3.** Concentration-cytotoxicity and concentration-effect relationships of the confirmed baseline toxicants in AhR-CALUX.

On the left plot are all data plotted on a logarithmic concentration scale with the percent response in relation to the potent agonist 2,3,7,8-Tetrachlorodibenzodioxin represented in blue filled symbols (left y-axis) and the cytotoxicity in empty black-rimmed symbols (right y-axis). Different symbols refer to different independent experiments. On the right are only experimental cytotoxicity data depicted that are in the linear portion of the concentration-cytotoxicity relationship (solid line) up to 40% cytotoxicity (=100% - % cell viability), from which the  $IC_{10}$  is derived (10% effect level marked by a dotted line). In the middle plot are only experimental effect data in the linear portion of the concentration-effect relationship, from which the  $EC_{10}$  is derived (10% effect level marked by a dotted horizontal line);  $IC_{10}$ , which is normally the cut-off for evaluation of reporter gene activation, marked by a vertical dotted line.

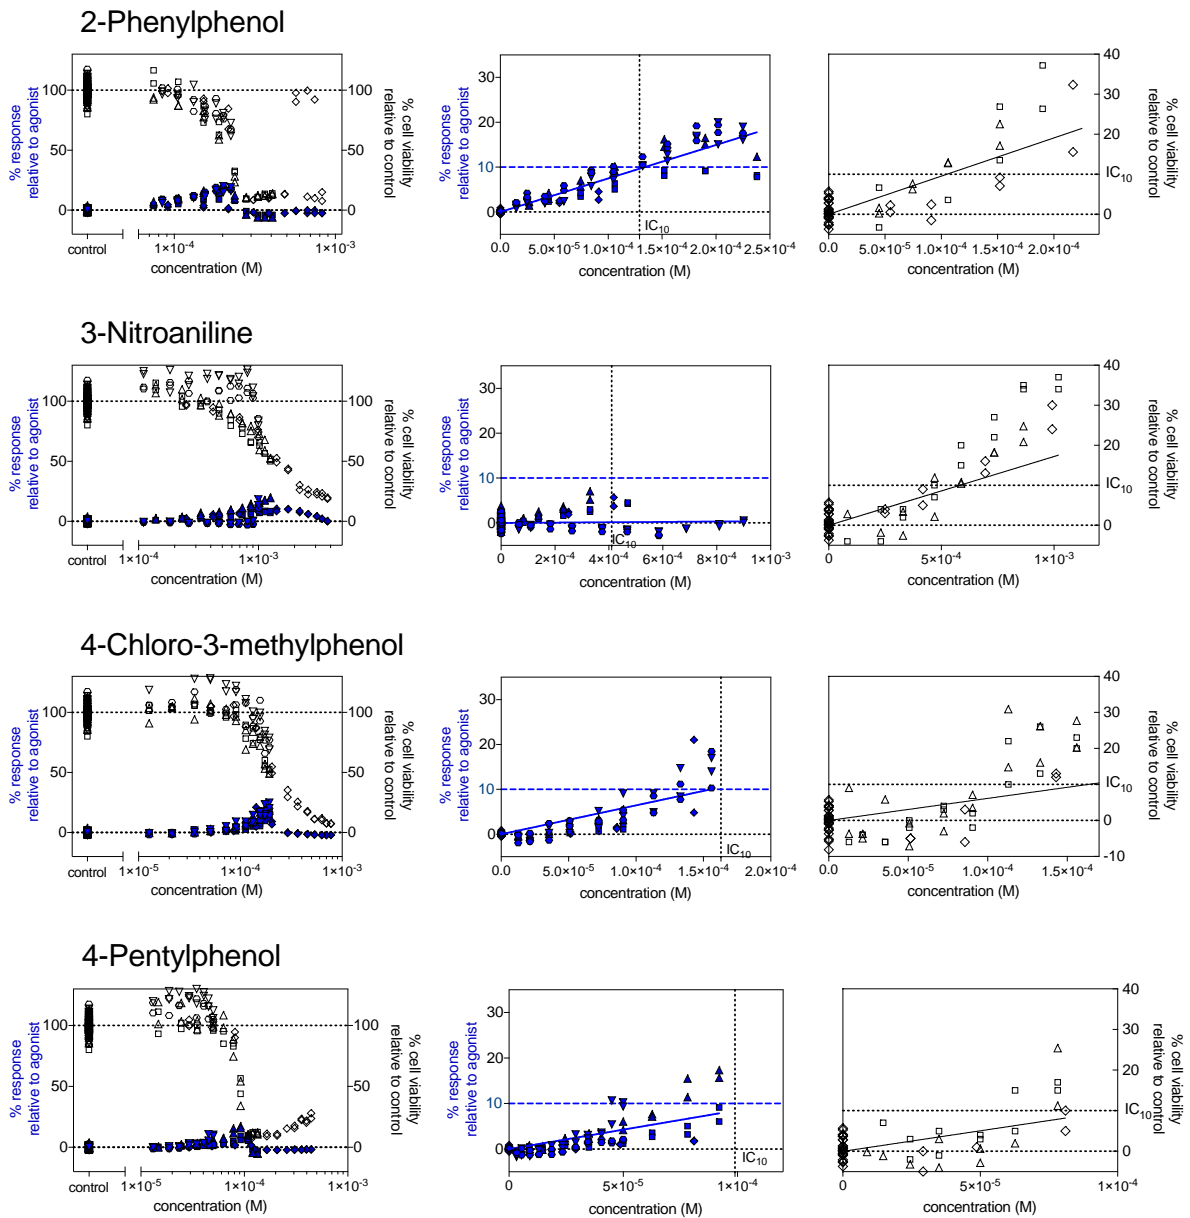

Supplementary Material  
Cytotoxicity burst? Differentiating specific from nonspecific effects in reporter gene assays

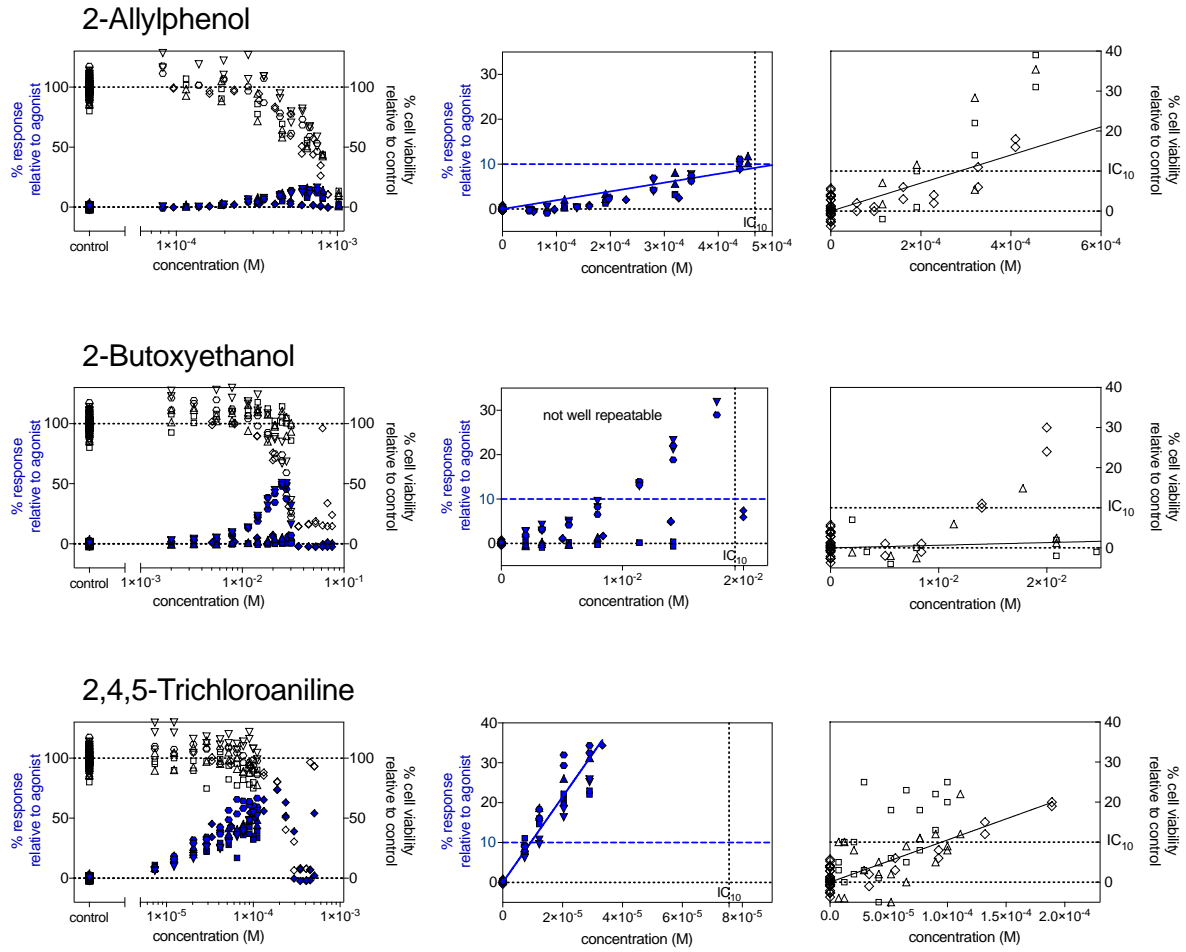



**Figure S4.** Concentration-cytotoxicity and concentration-effect relationships of the confirmed baseline toxicants in PPAR $\gamma$ -BLA.

On the left plot are all data plotted on a logarithmic concentration scale with the percent response in relation to the potent agonist Rosiglitazone represented in blue filled symbols (left y-axis) and the cytotoxicity in empty black-rimmed symbols (right y-axis). Different symbols refer to different independent experiments. On the right are only experimental cytotoxicity data depicted that are in the linear portion of the concentration-cytotoxicity relationship (solid line) up to 40% cytotoxicity (=100% - % cell viability), from which the IC<sub>10</sub> is derived (10% effect level marked by a dotted line). In the middle plot are only experimental effect data in the linear portion of the concentration-effect relationship, from which the EC<sub>10</sub> is derived (10% effect level marked by a dotted horizontal line); IC<sub>10</sub>, which is normally the cut-off for evaluation of reporter gene activation, marked by a vertical dotted line.

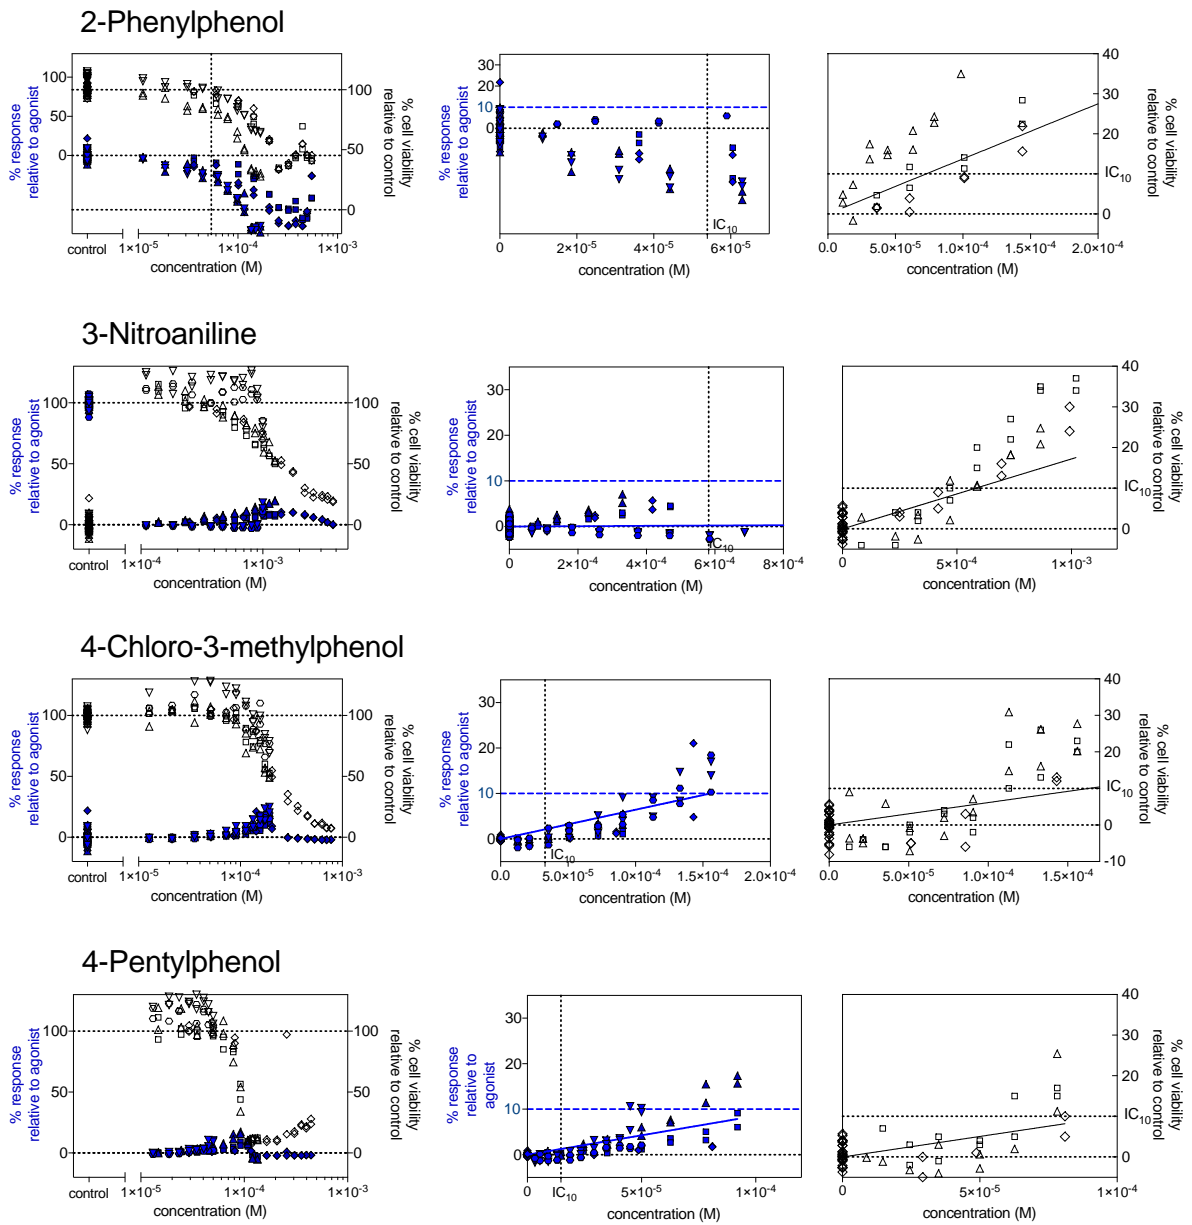

Supplementary Material  
Cytotoxicity burst? Differentiating specific from nonspecific effects in reporter gene assays

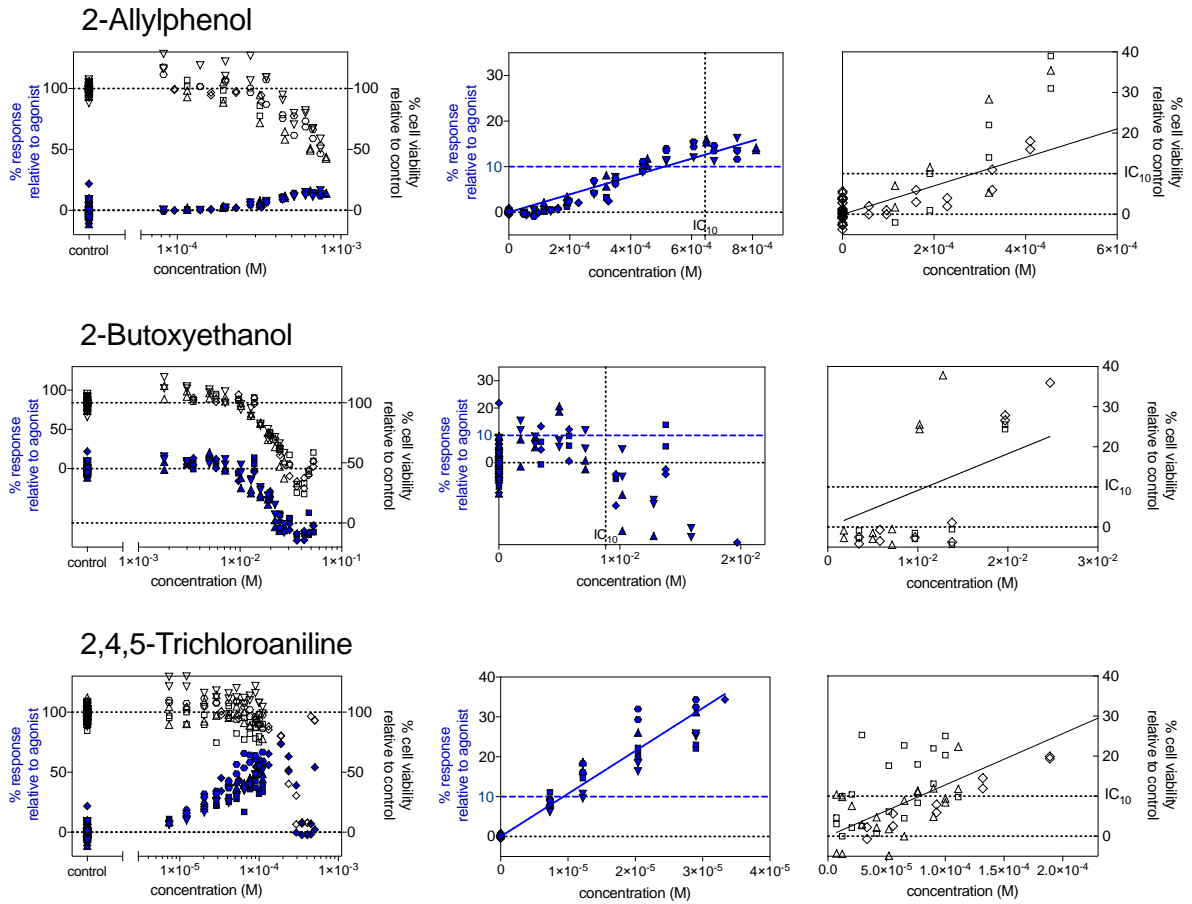

**Figure S5.** Concentration-cytotoxicity and concentration-effect relationships of the confirmed baseline toxicants in AR-BLA.

On the left plot are all data plotted on a logarithmic concentration scale with the percent response relative to the maximum effect represented in green filled symbols (left y-axis) and the cytotoxicity in empty black-rimmed symbols (right y-axis). Different symbols refer to different independent experiments. On the right are only experimental cytotoxicity data depicted that are in the linear portion of the concentration-cytotoxicity relationship (solid line) up to 40% cytotoxicity (=100% - % cell viability), from which the  $IC_{10}$  is derived (10% effect level marked by a dotted line). In the middle plot are only experimental effect data in the linear portion of the concentration-effect relationship, from which the  $EC_{10}$  is derived (10% effect level marked by a dotted horizontal line);  $IC_{10}$ , which is normally the cut-off for evaluation of reporter gene activation, marked by a vertical dotted line.

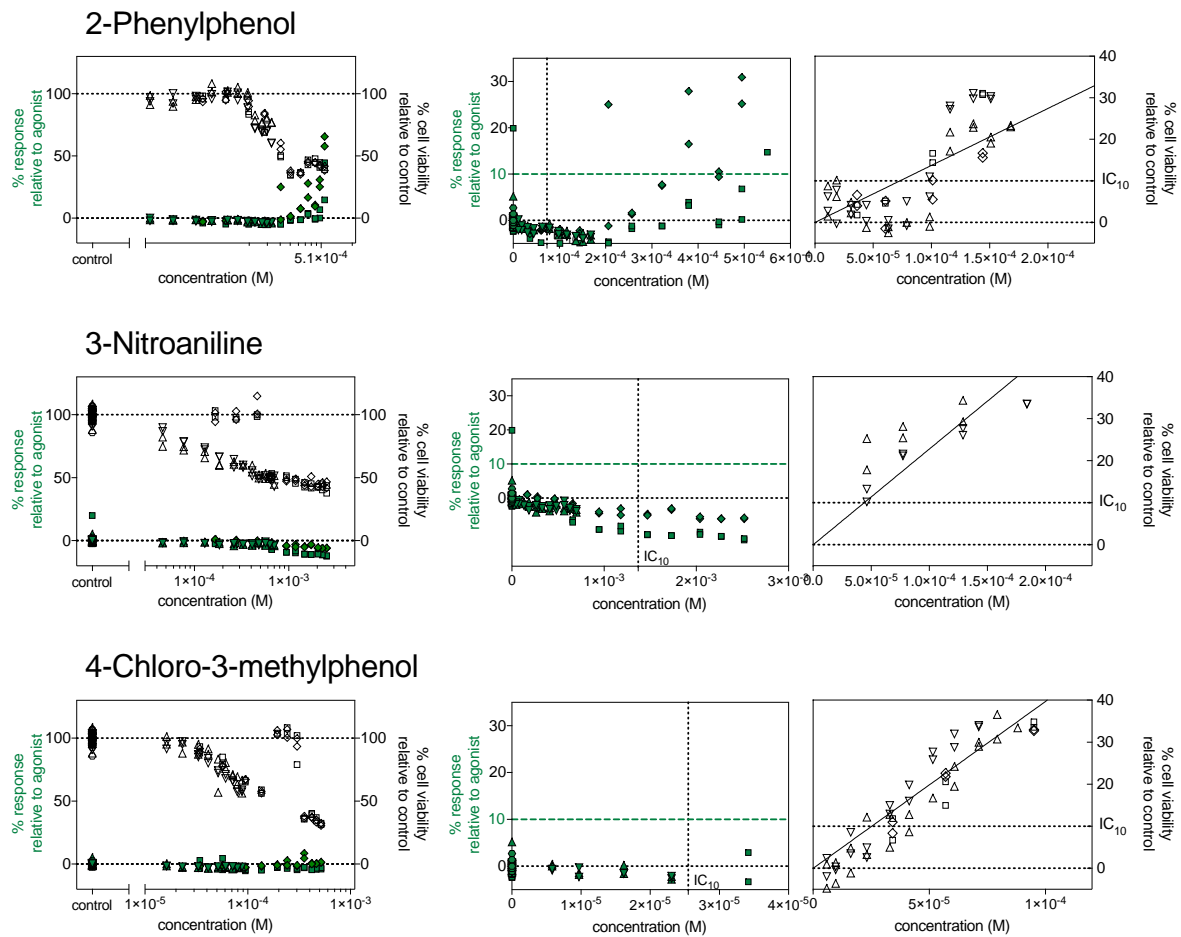

### 4-Pentylphenol

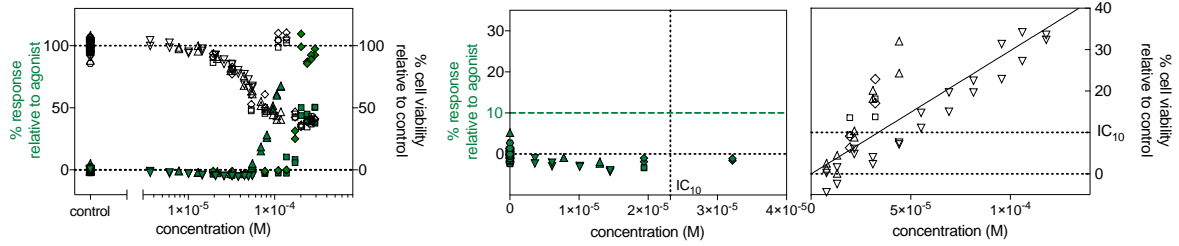

### 2-Allylphenol

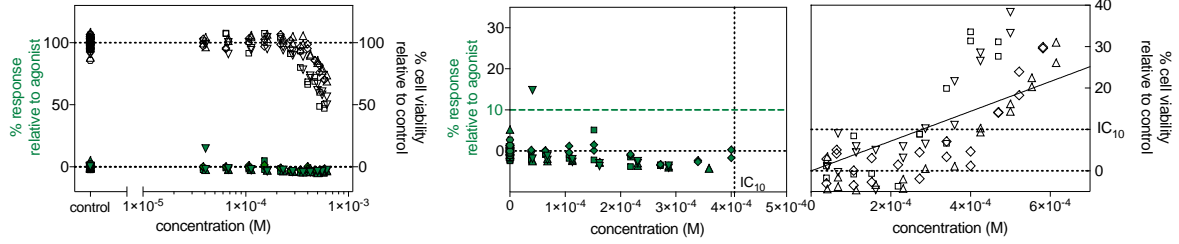

### Butoxyethanol

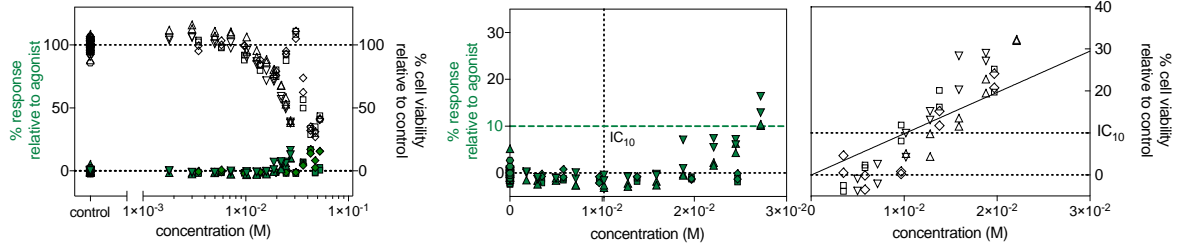

### 2,4,5-Trichloroaniline

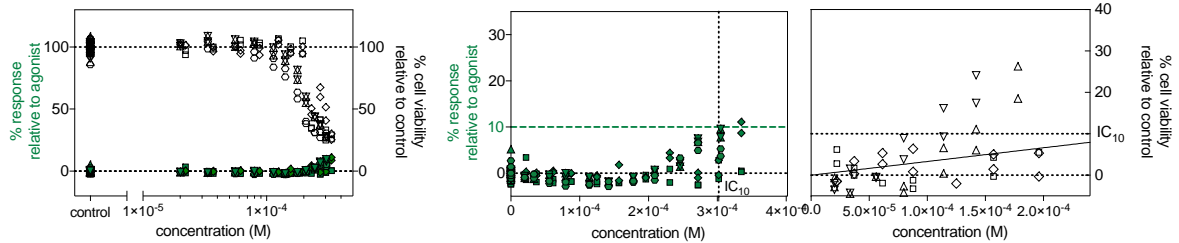

**Figure S6.** Concentration-cytotoxicity and concentration-effect relationships of the confirmed baseline toxicants in ER $\alpha$ -BLA.

On the left plot are all data plotted on a logarithmic concentration scale with the percent response relative to the maximum effect represented in green filled symbols (left y-axis) and the cytotoxicity in empty black-rimmed symbols (right y-axis). Different symbols refer to different independent experiments. On the right are only experimental cytotoxicity data depicted that are in the linear portion of the concentration-cytotoxicity relationship (solid line) up to 40% cytotoxicity (=100% - % cell viability), from which the IC<sub>10</sub> is derived (10% effect level marked by a dotted line). In the middle plot are only experimental effect data in the linear portion of the concentration-effect relationship, from which the EC<sub>10</sub> is derived (10% effect level marked by a dotted horizontal line); IC<sub>10</sub>, which is normally the cut-off for evaluation of reporter gene activation, marked by a vertical dotted line.

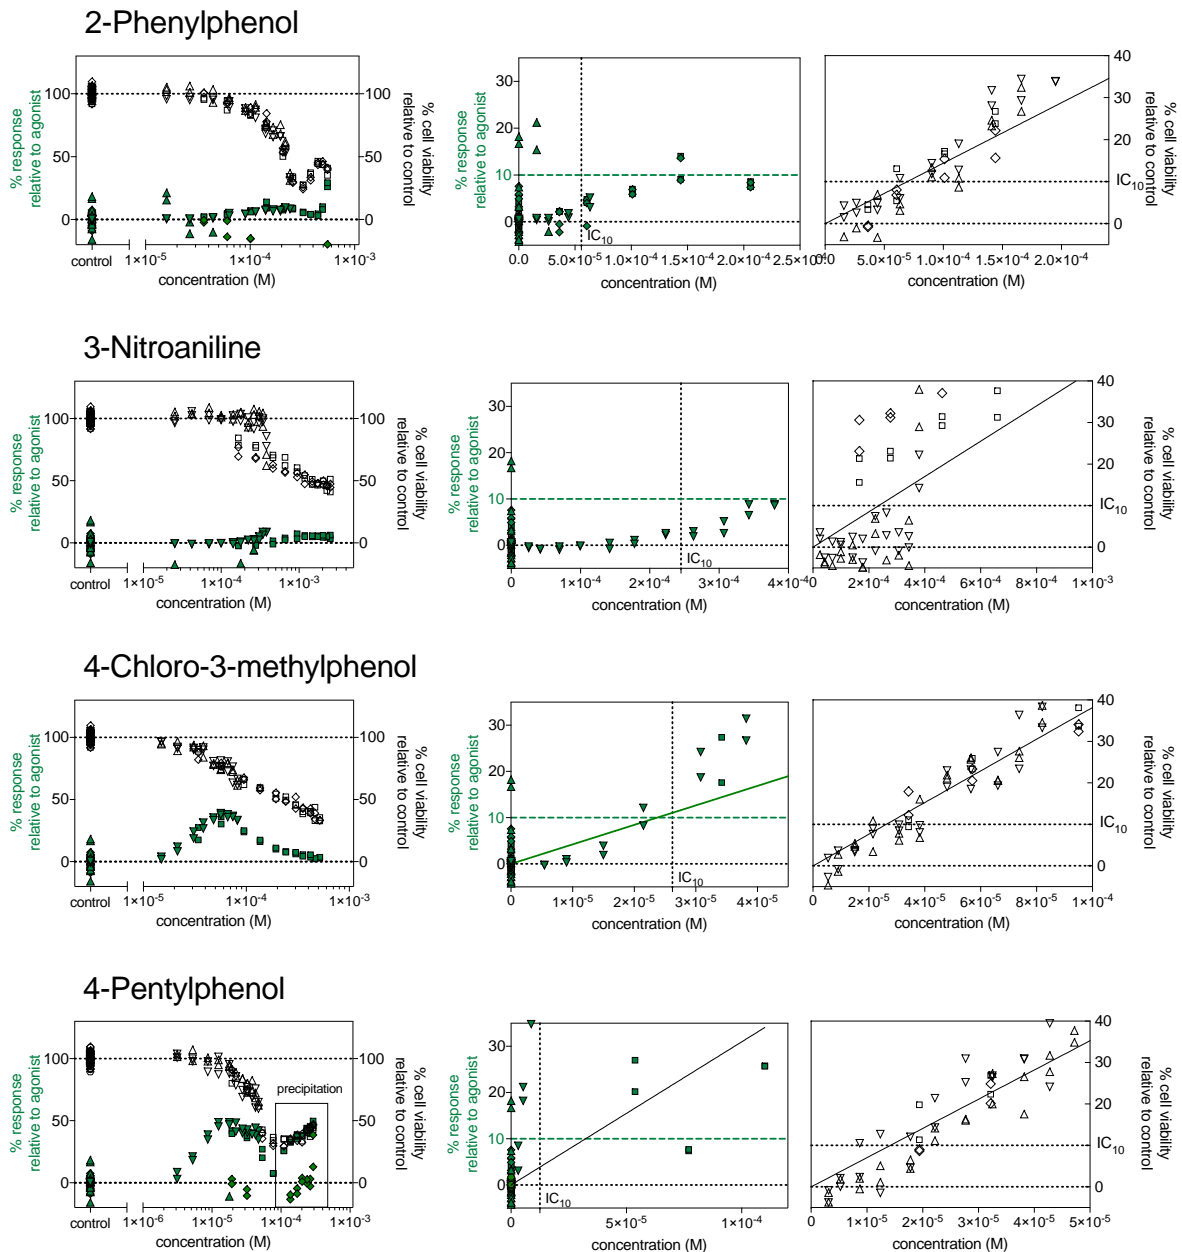

### 2-Allylphenol

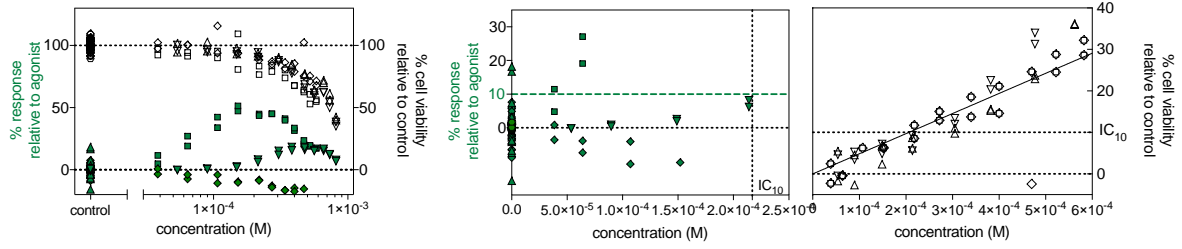

### 2-Butoxyethanol

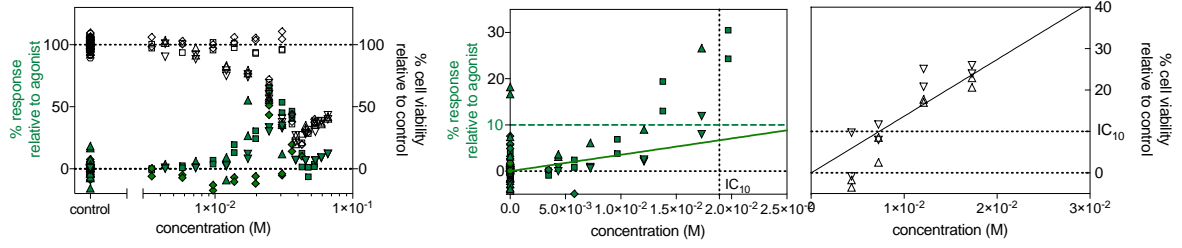

### 2,4,5-Trichloroaniline

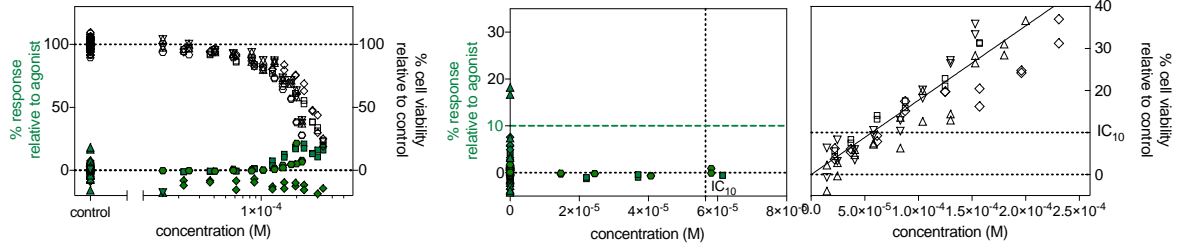

**Figure S7.** Concentration-cytotoxicity and concentration-effect relationships of the confirmed baseline toxicants in PR-BLA.

On the left plot are all data plotted on a logarithmic concentration scale with the percent response relative to the maximum effect represented in green filled symbols (left y-axis) and the cytotoxicity in empty black-rimmed symbols (right y-axis). Different symbols refer to different independent experiments. On the right are only experimental cytotoxicity data depicted that are in the linear portion of the concentration-cytotoxicity relationship (solid line) up to 40% cytotoxicity (=100% - % cell viability), from which the  $IC_{10}$  is derived (10% effect level marked by a dotted line). In the middle plot are only experimental effect data in the linear portion of the concentration-effect relationship, from which the  $EC_{10}$  is derived (10% effect level marked by a dotted horizontal line);  $IC_{10}$ , which is normally the cut-off for evaluation of reporter gene activation, marked by a vertical dotted line.

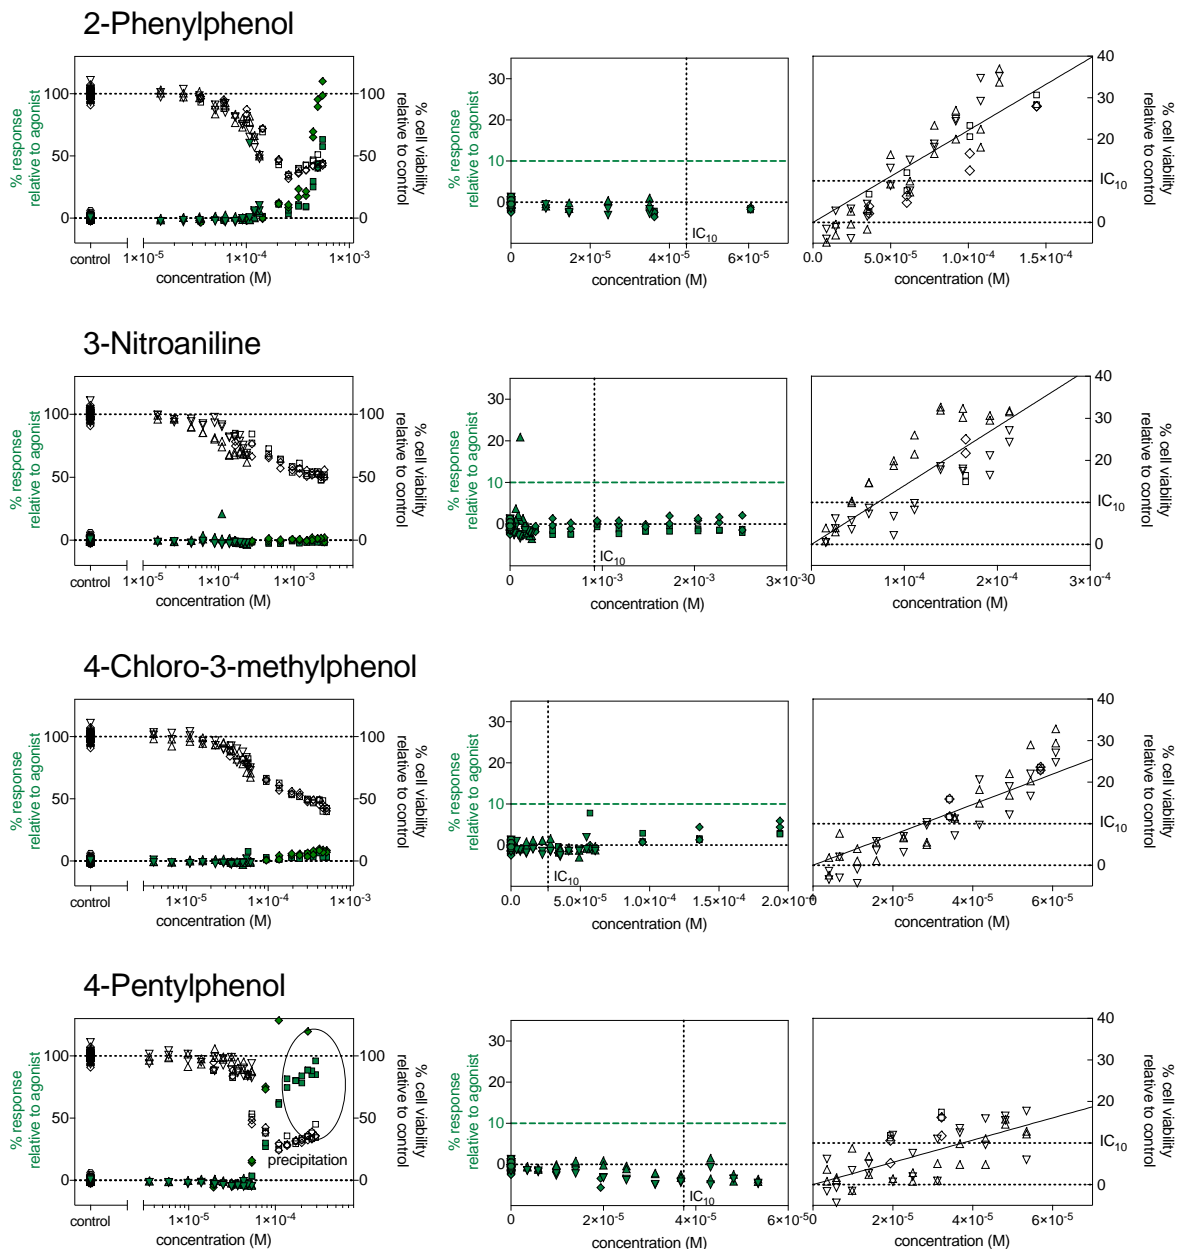

### 2-Allylphenol

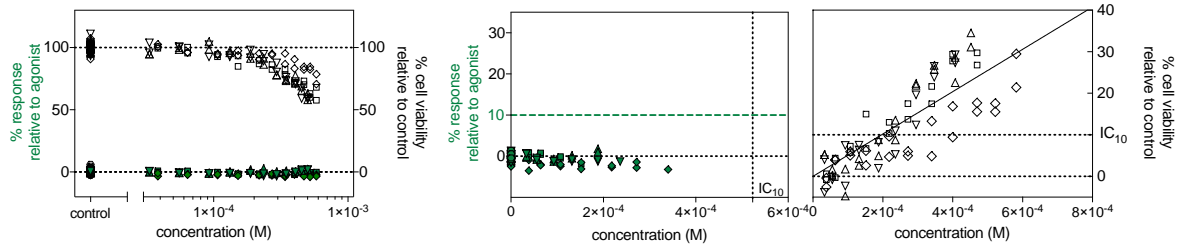

### Butoxyethanol

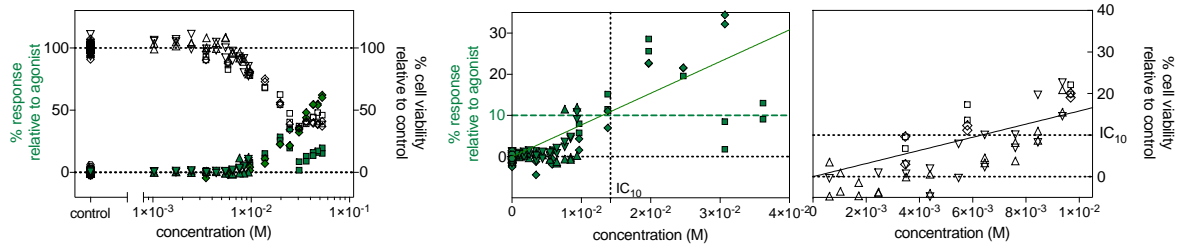

### 2,4,5-Trichloroaniline

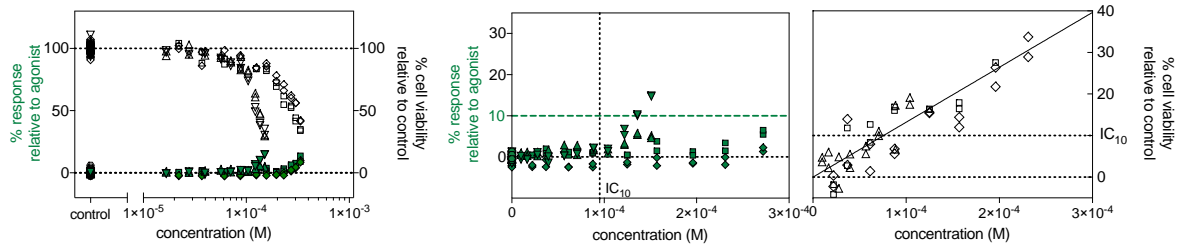



**Figure S8.** Concentration-cytotoxicity and concentration-effect relationships of the confirmed baseline toxicants in GR-BLA.

On the left plot are all data plotted on a logarithmic concentration scale with the percent response relative to the maximum effect represented in green filled symbols (left y-axis) and the cytotoxicity in empty black-rimmed symbols (right y-axis). Different symbols refer to different independent experiments. On the right are only experimental cytotoxicity data depicted that are in the linear portion of the concentration-cytotoxicity relationship (solid line) up to 40% cytotoxicity (=100% - % cell viability), from which the  $IC_{10}$  is derived (10% effect level marked by a dotted line). In the middle plot are only experimental effect data in the linear portion of the concentration-effect relationship, from which the  $EC_{10}$  is derived (10% effect level marked by a dotted horizontal line);  $IC_{10}$ , which is normally the cut-off for evaluation of reporter gene activation, marked by a vertical dotted line.

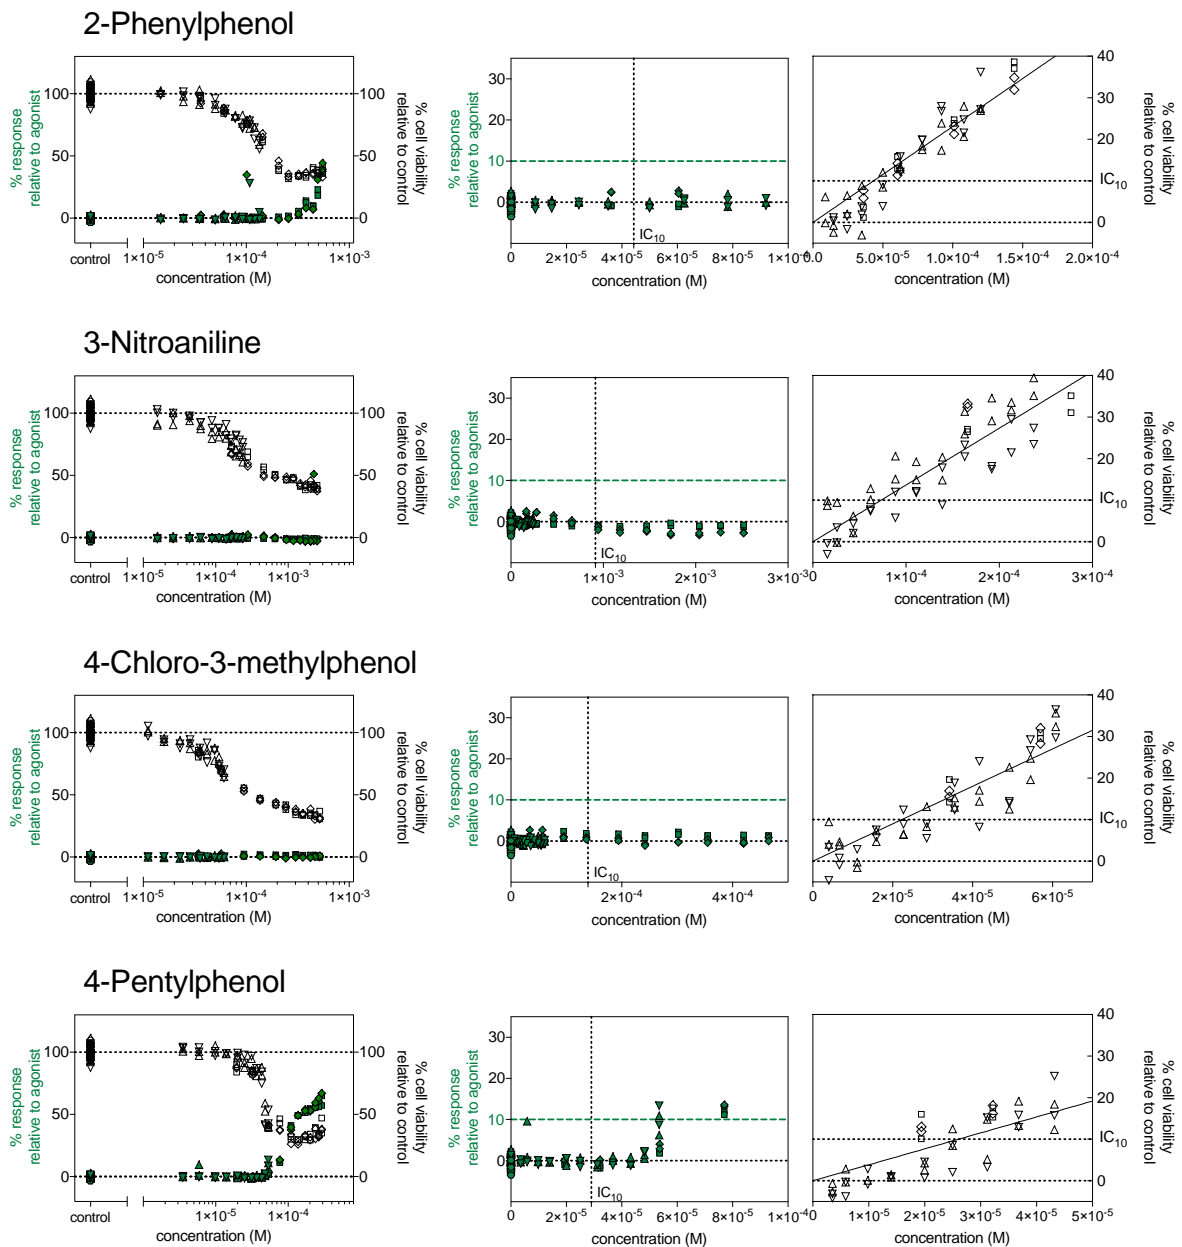

### 2-Allylphenol

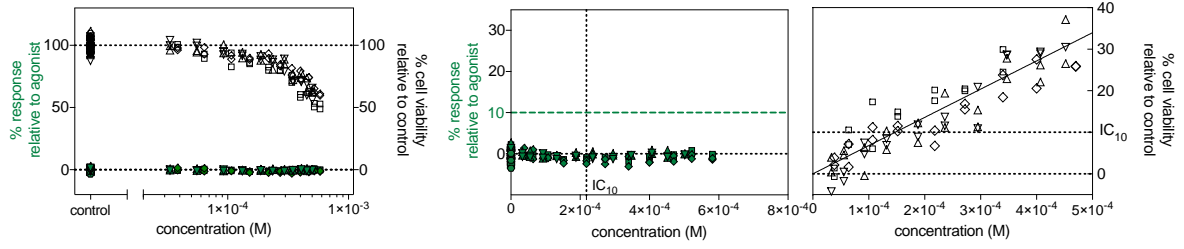

### Butoxyethanol

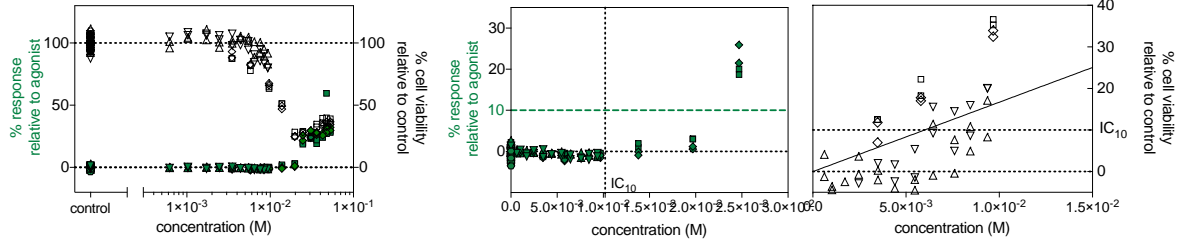

### 2,4,5-Trichloroaniline

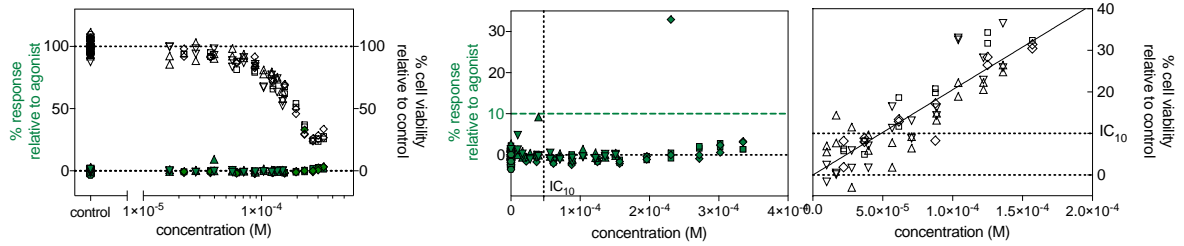

**Figure S9.** Concentration-cytotoxicity and concentration-effect relationships of the environmental chemicals in AREc32.

On the left plot are all data plotted on a logarithmic concentration scale with the induction ratio of AREc32 represented in red filled symbols (left y-axis) and the cytotoxicity in empty black-rimmed symbols (right y-axis). Different symbols refer to different independent experiments. On the right are only experimental cytotoxicity data depicted that are in the linear portion of the concentration-cytotoxicity relationship (solid line) up to 40% cytotoxicity (=100% - % cell viability), from which the  $IC_{10}$  is derived (10% effect level marked by a dotted line). In the middle plot are only experimental effect data in the linear portion of the concentration-effect relationship, from which the  $EC_{IR1.5}$  is derived (IR 1.5 effect level marked by a dotted horizontal line);  $IC_{10}$ , which is normally the cut-off for evaluation of reporter gene activation, marked by a vertical dotted line.

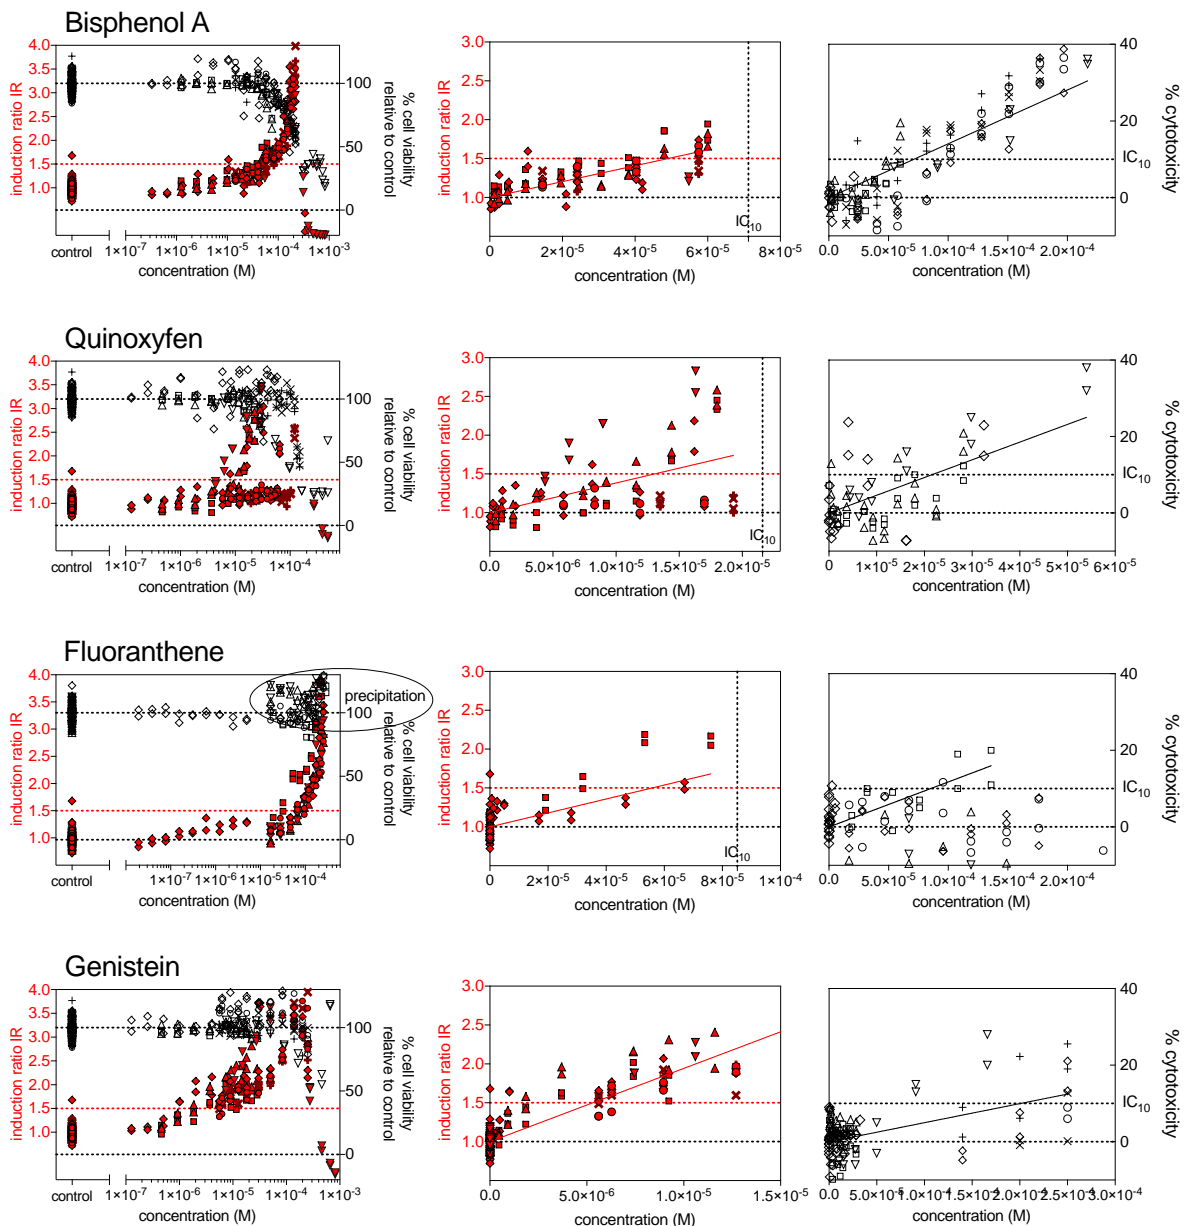

Supplementary Material  
Cytotoxicity burst? Differentiating specific from nonspecific effects in reporter gene assays

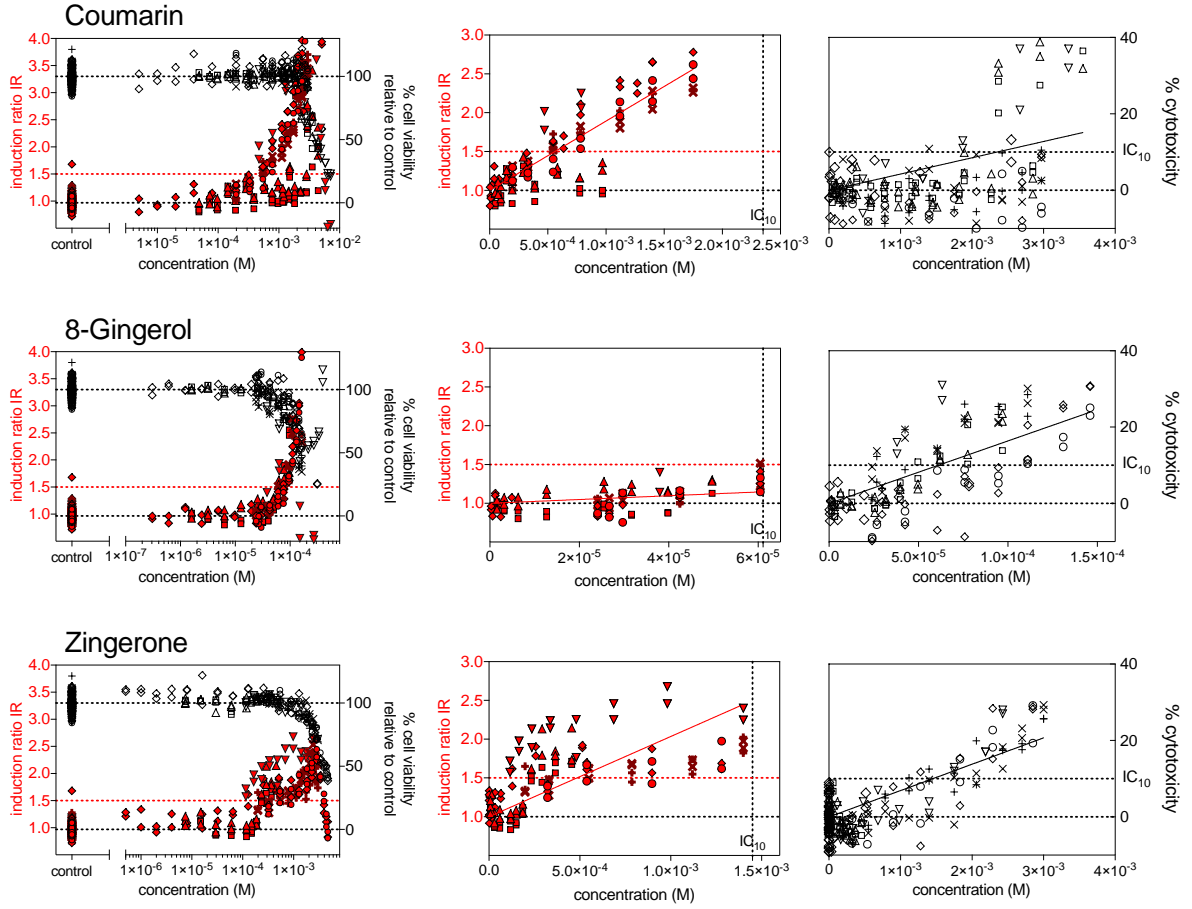

**Figure S10.** Concentration-cytotoxicity and concentration-effect relationships of the environmental chemicals in ARE-BLA.

On the left plot are all data plotted on a logarithmic concentration scale with the induction ratio of ARE-BLA represented in red filled symbols (left y-axis) and the cytotoxicity in empty black-rimmed symbols (right y-axis). Different symbols refer to different independent experiments. On the right are only experimental cytotoxicity data depicted that are in the linear portion of the concentration-cytotoxicity relationship (solid line) up to 40% cytotoxicity (=100% - % cell viability), from which the  $IC_{10}$  is derived (10% effect level marked by a dotted line). In the middle plot are only experimental effect data in the linear portion of the concentration-effect relationship, from which the  $EC_{IR1.5}$  is derived (IR 1.5 effect level marked by a dotted horizontal line);  $IC_{10}$ , which is normally the cut-off for evaluation of reporter gene activation, marked by a vertical dotted line.

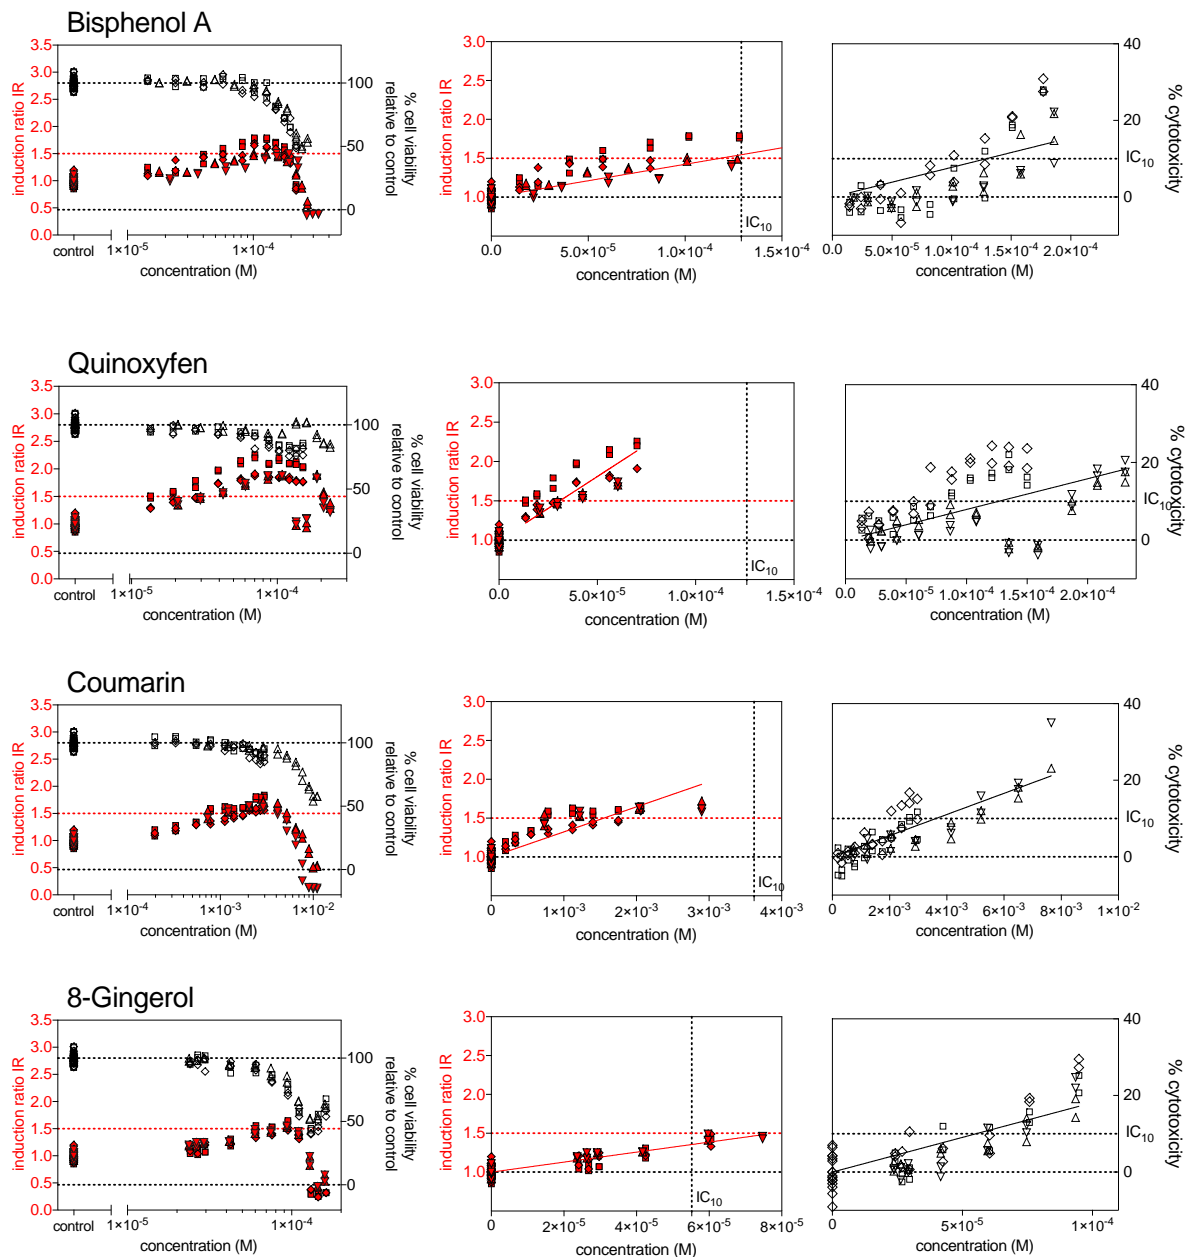

Supplementary Material  
Cytotoxicity burst? Differentiating specific from nonspecific effects in reporter gene assays

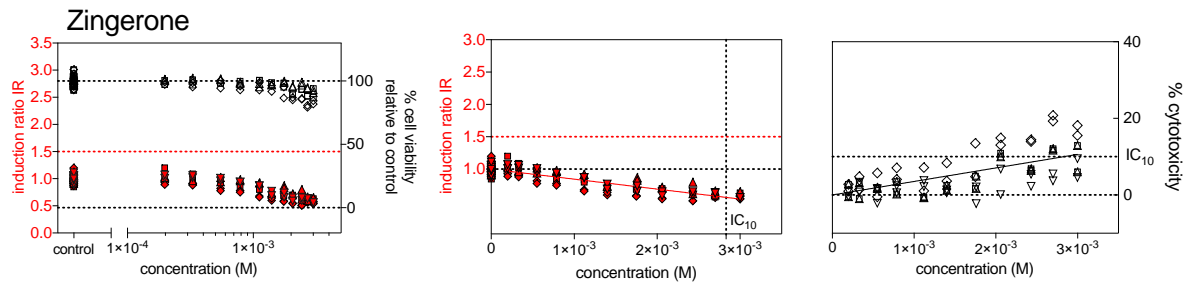

**Figure S11.** Concentration-cytotoxicity and concentration-effect relationships of the environmental chemicals in AhR-CALUX.

On the left plot are all data plotted on a logarithmic concentration scale with the percent response in relation to the potent agonist 2,3,7,8-Tetrachlorodibenzodioxin represented in blue filled symbols (left y-axis) and the cytotoxicity in empty black-rimmed symbols (right y-axis). Different symbols refer to different independent experiments. On the right are only experimental cytotoxicity data depicted that are in the linear portion of the concentration-cytotoxicity relationship (solid line) up to 40% cytotoxicity (=100% - % cell viability), from which the  $IC_{10}$  is derived (10% effect level marked by a dotted line). In the middle plot are only experimental effect data in the linear portion of the concentration-effect relationship, from which the  $EC_{10}$  is derived (10% effect level marked by a dotted horizontal line);  $IC_{10}$ , which is normally the cut-off for evaluation of reporter gene activation, marked by a vertical dotted line.

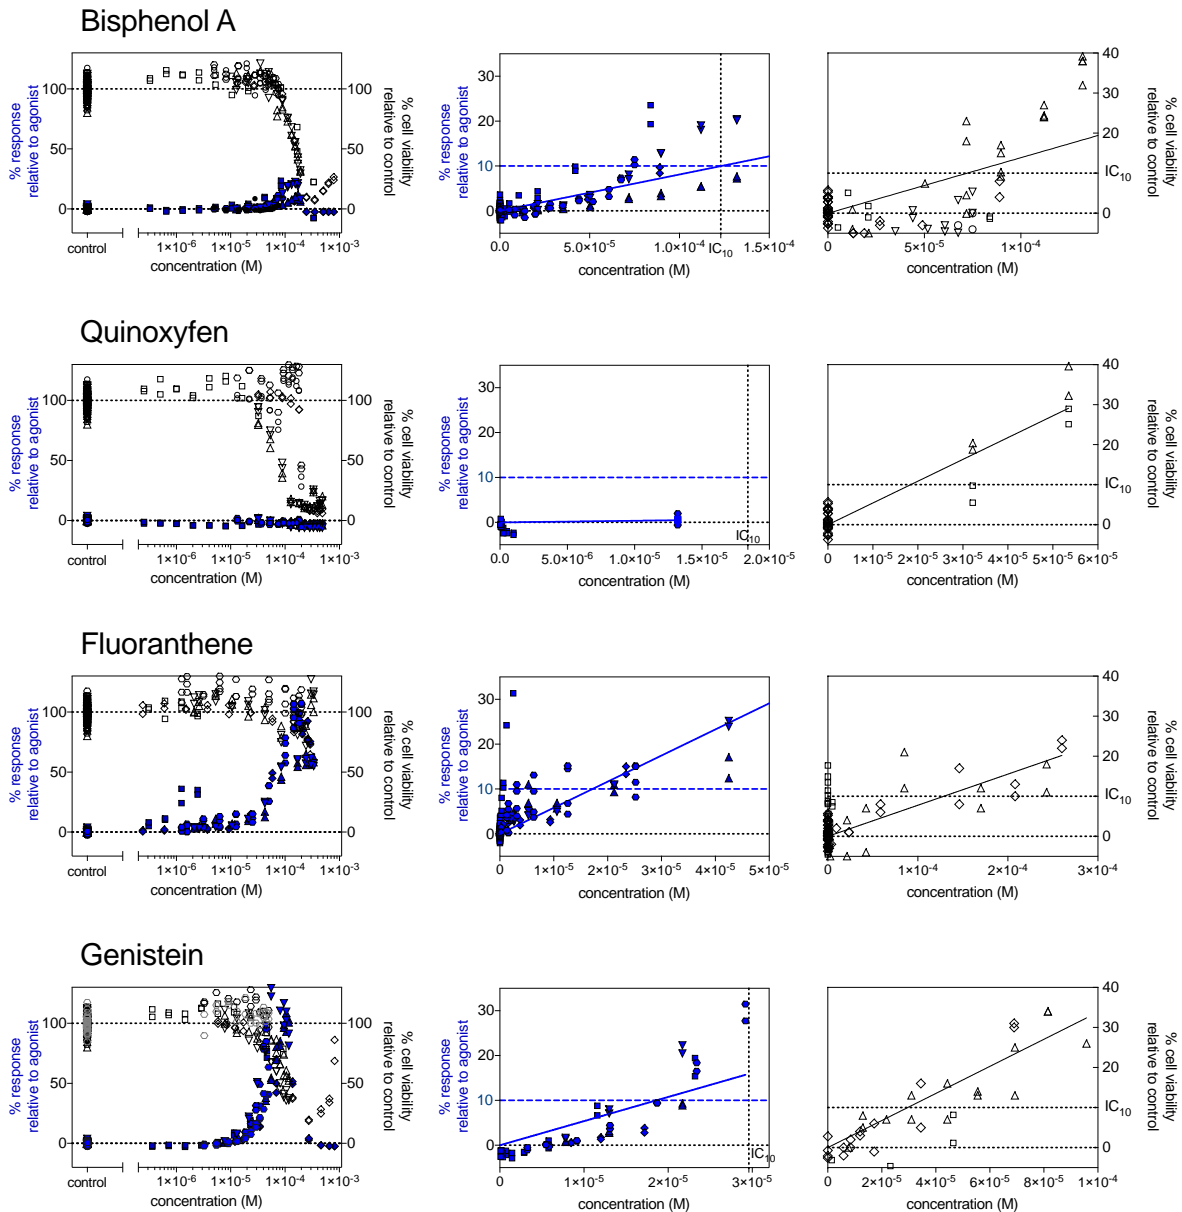

Supplementary Material  
Cytotoxicity burst? Differentiating specific from nonspecific effects in reporter gene assays

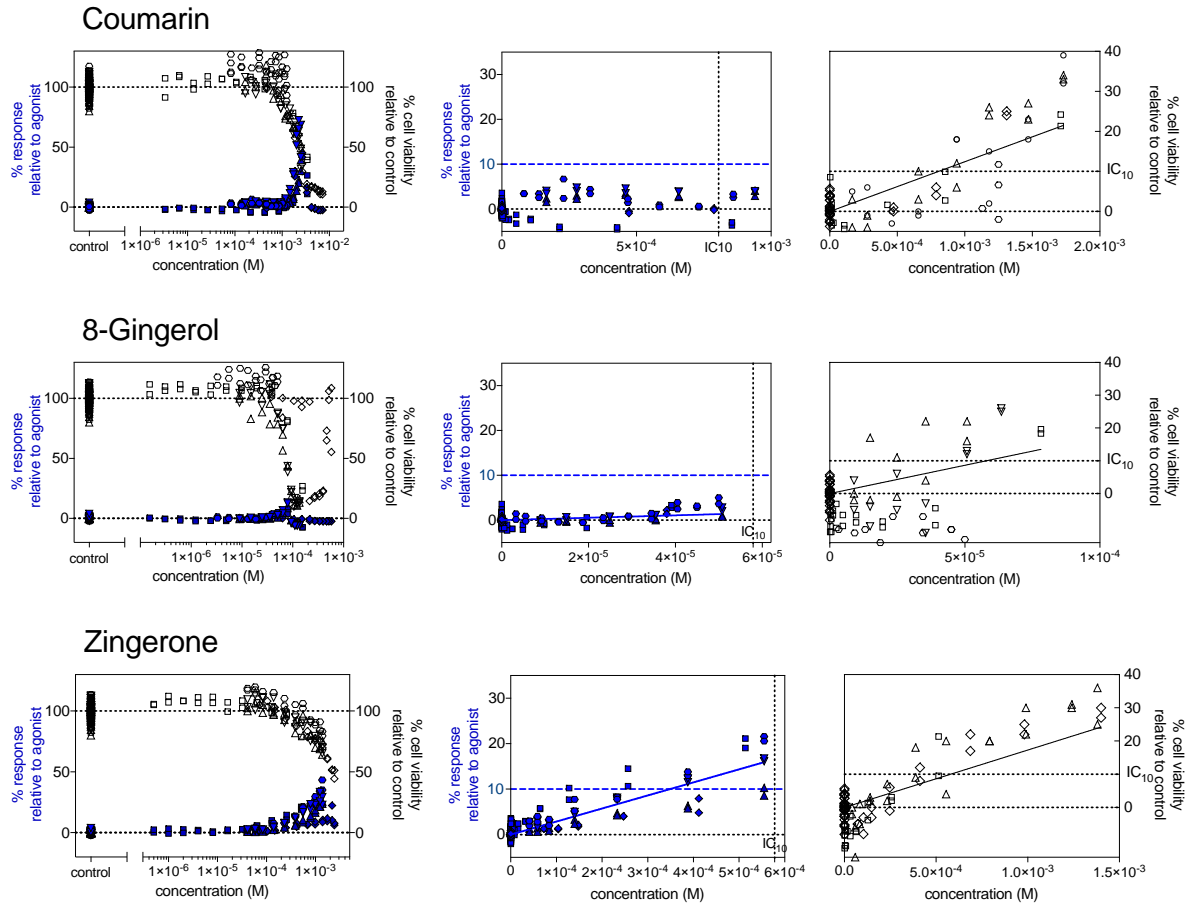



**Figure S12.** Concentration-cytotoxicity and concentration-effect relationships of the environmental chemicals in PPAR $\gamma$ -BLA.

On the left plot are all data plotted on a logarithmic concentration scale with the percent response in relation to the potent agonist Rosiglitazone represented in blue filled symbols (left y-axis) and the cytotoxicity in empty black-rimmed symbols (right y-axis). Different symbols refer to different independent experiments. On the right are only experimental cytotoxicity data depicted that are in the linear portion of the concentration-cytotoxicity relationship (solid line) up to 40% cytotoxicity (=100% - % cell viability), from which the IC<sub>10</sub> is derived (10% effect level marked by a dotted line). In the middle plot are only experimental effect data in the linear portion of the concentration-effect relationship, from which the EC<sub>10</sub> is derived (10% effect level marked by a dotted horizontal line); IC<sub>10</sub>, which is normally the cut-off for evaluation of reporter gene activation, marked by a vertical dotted line.

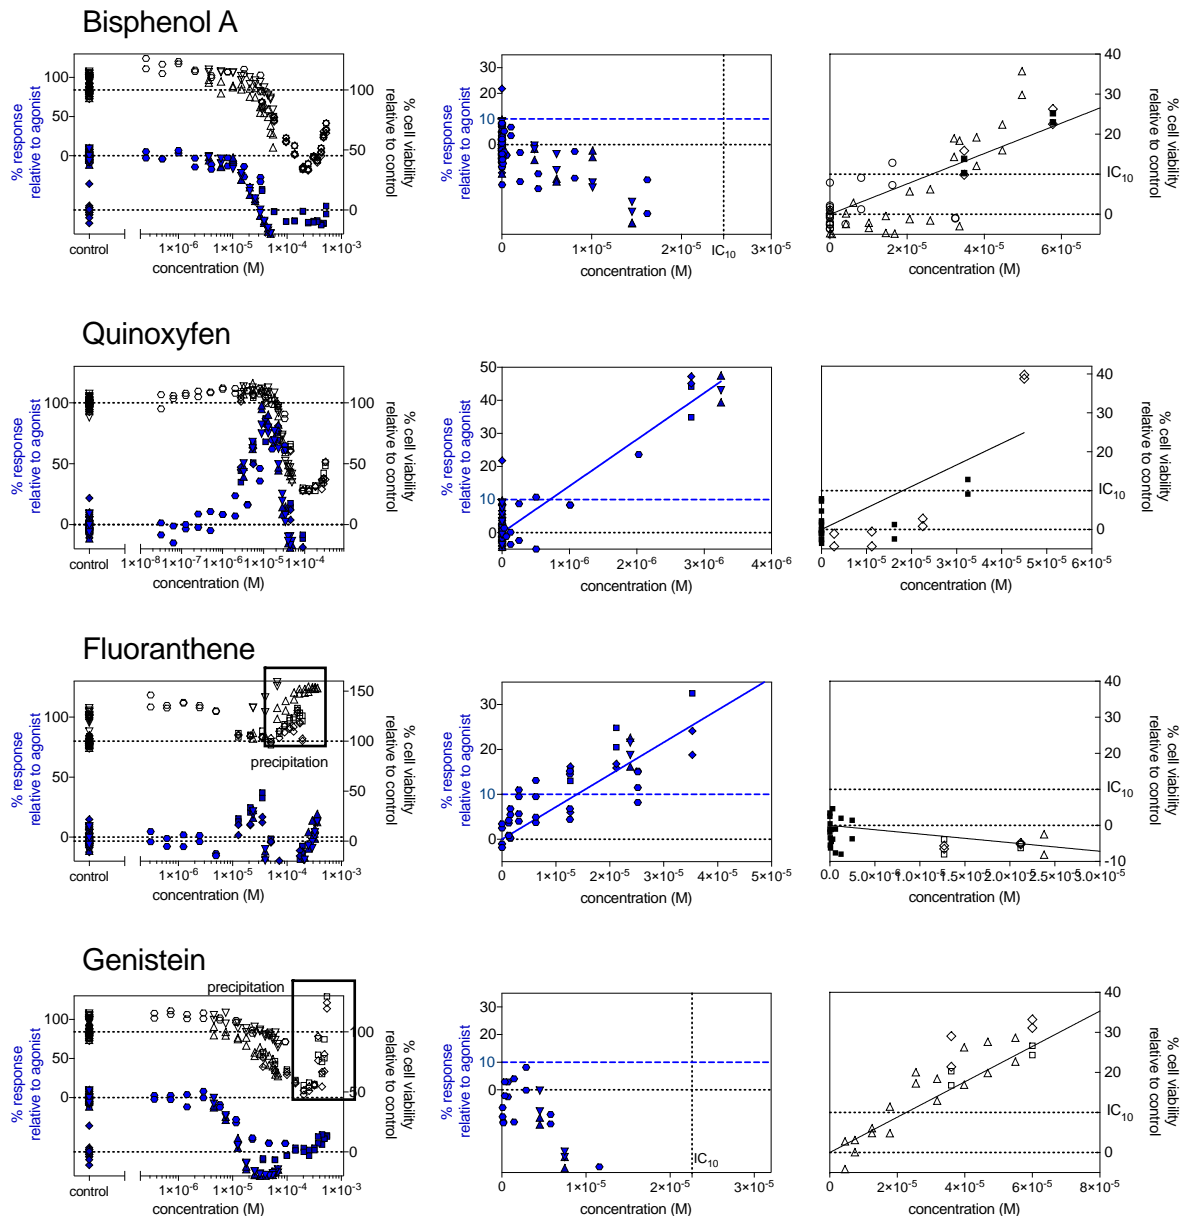

Supplementary Material  
Cytotoxicity burst? Differentiating specific from nonspecific effects in reporter gene assays

### Coumarin

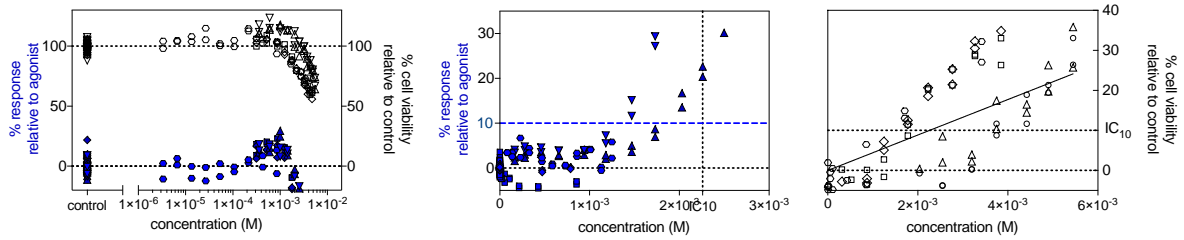

### 8-Gingerol

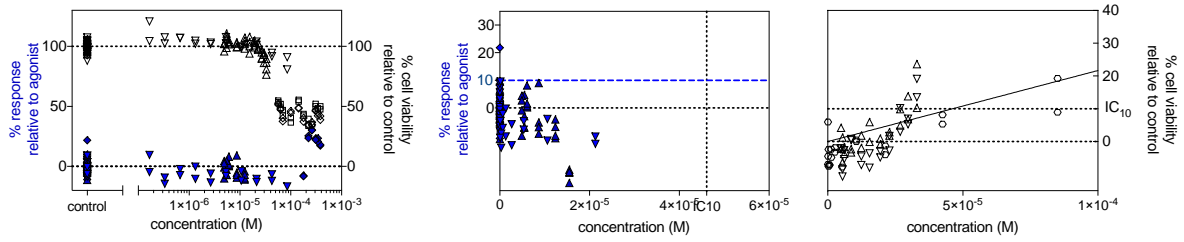

### Zingerone

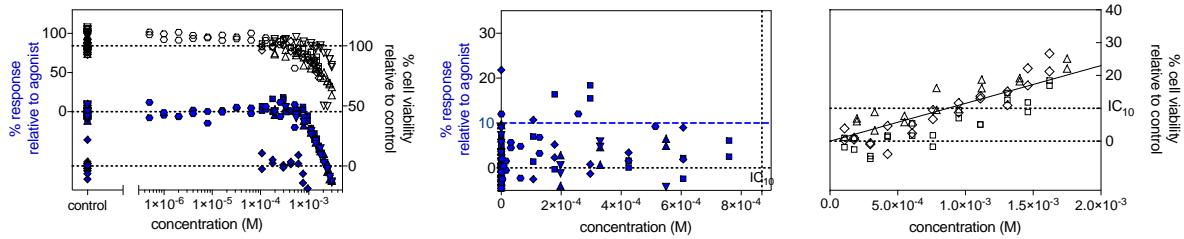

**Figure S13.** Concentration-cytotoxicity and concentration-effect relationships of the environmental chemicals in AR-BLA.

On the left plot are all data plotted on a logarithmic concentration scale with the percent response relative to the maximum effect represented in green filled symbols (left y-axis) and the cytotoxicity in empty black-rimmed symbols (right y-axis). Different symbols refer to different independent experiments. On the right are only experimental cytotoxicity data depicted that are in the linear portion of the concentration-cytotoxicity relationship (solid line) up to 40% cytotoxicity (=100% - % cell viability), from which the  $IC_{10}$  is derived (10% effect level marked by a dotted line). In the middle plot are only experimental effect data in the linear portion of the concentration-effect relationship, from which the  $EC_{10}$  is derived (10% effect level marked by a dotted horizontal line);  $IC_{10}$ , which is normally the cut-off for evaluation of reporter gene activation, marked by a vertical dotted line.

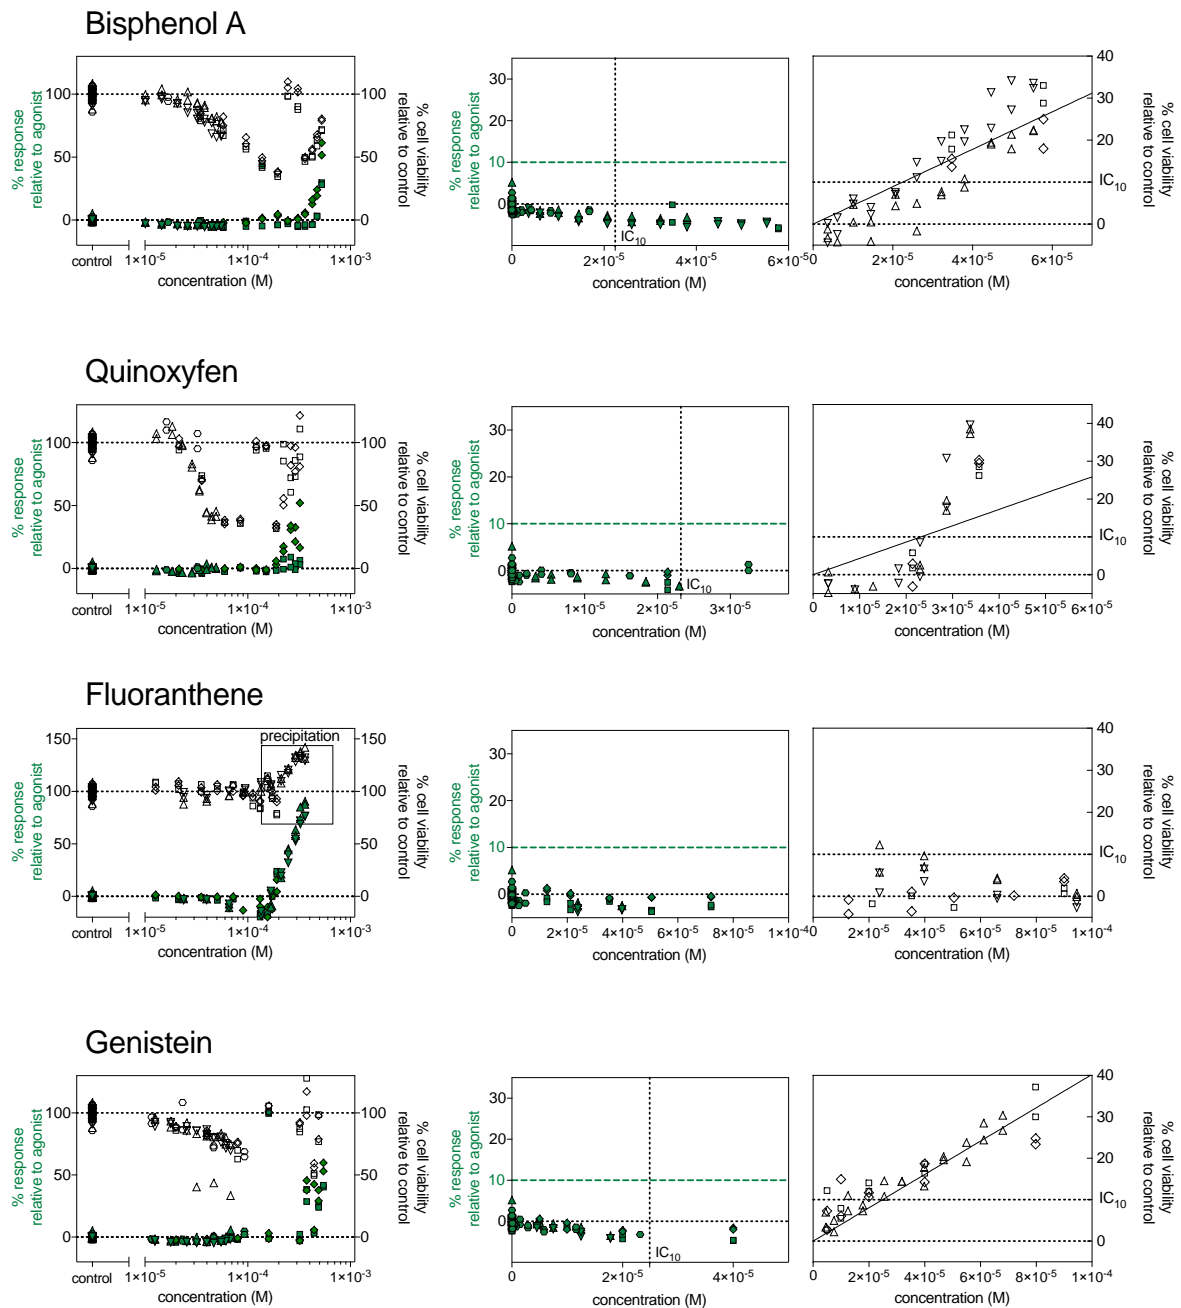

### Coumarin

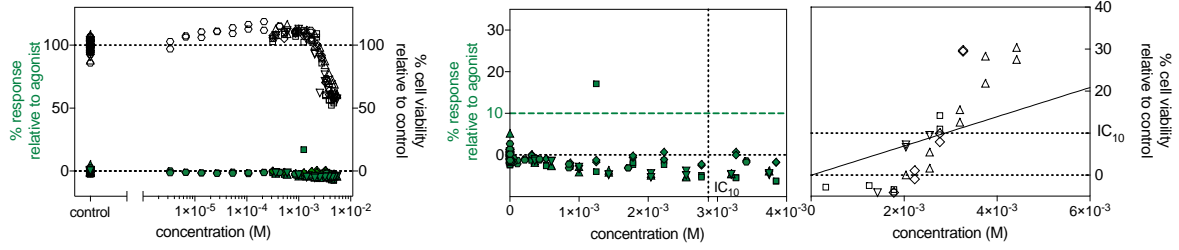

### 8-Gingerol

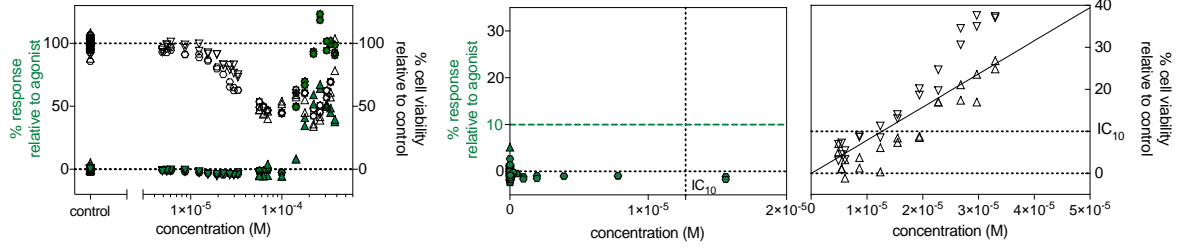

### Zingerone

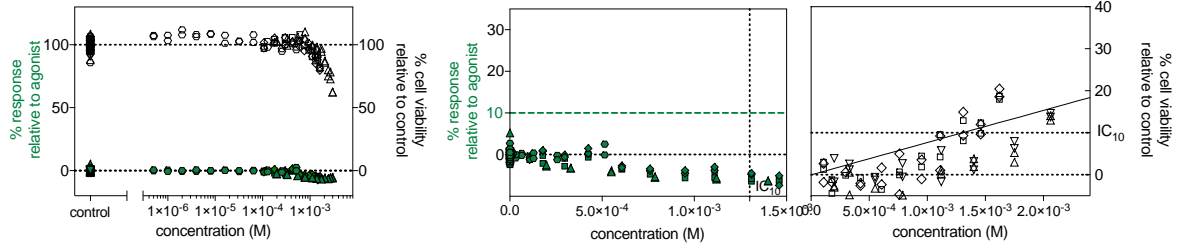

**Figure S14.** Concentration-cytotoxicity and concentration-effect relationships of the environmental chemicals in ER $\alpha$ -BLA.

On the left plot are all data plotted on a logarithmic concentration scale with the percent response relative to the maximum effect represented in green filled symbols (left y-axis) and the cytotoxicity in empty black-rimmed symbols (right y-axis). Different symbols refer to different independent experiments. On the right are only experimental cytotoxicity data depicted that are in the linear portion of the concentration-cytotoxicity relationship (solid line) up to 40% cytotoxicity (=100% - % cell viability), from which the IC<sub>10</sub> is derived (10% effect level marked by a dotted line). In the middle plot are only experimental effect data in the linear portion of the concentration-effect relationship, from which the EC<sub>10</sub> is derived (10% effect level marked by a dotted horizontal line); IC<sub>10</sub>, which is normally the cut-off for evaluation of reporter gene activation, marked by a vertical dotted line.

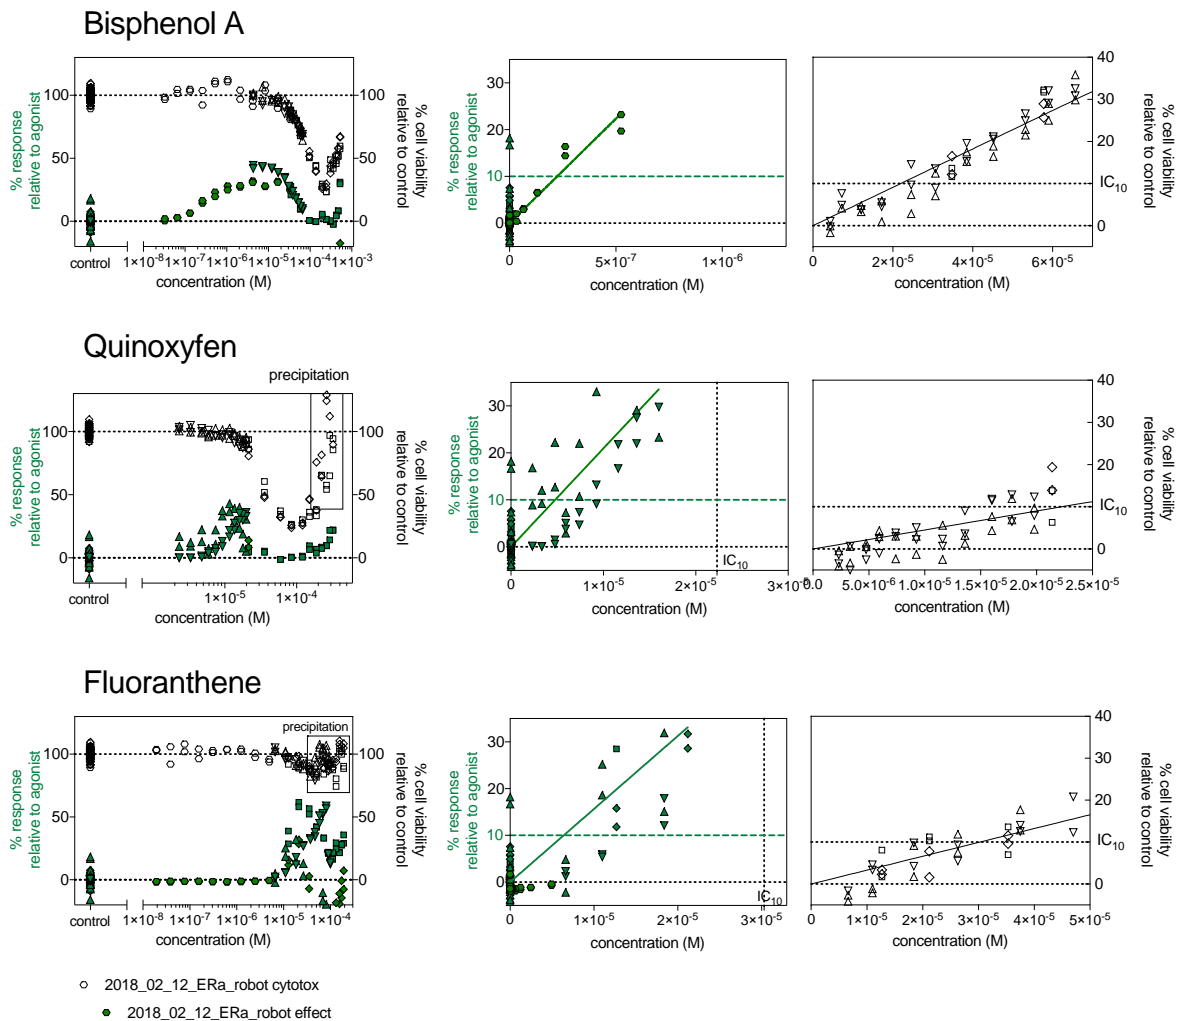

### Genistein

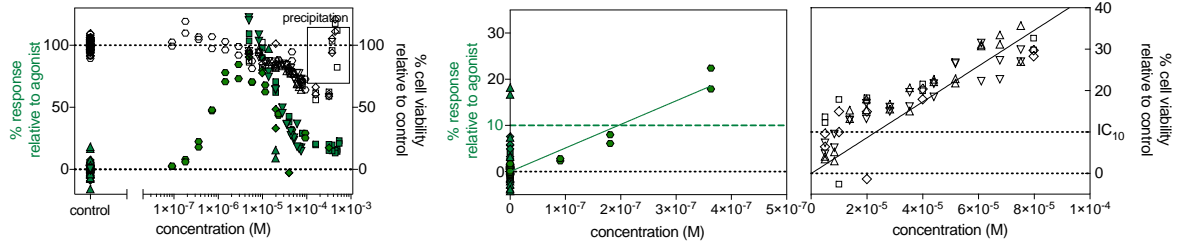

### Coumarin

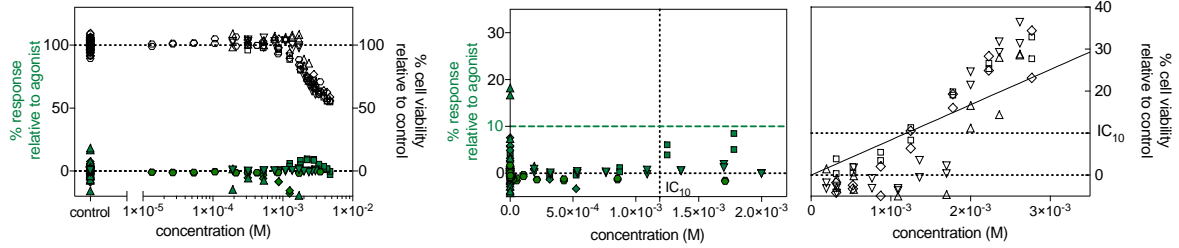

### 8-Gingerol

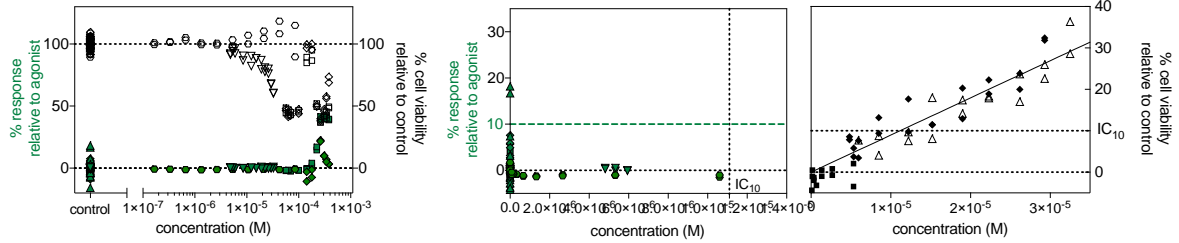

### Zingerone

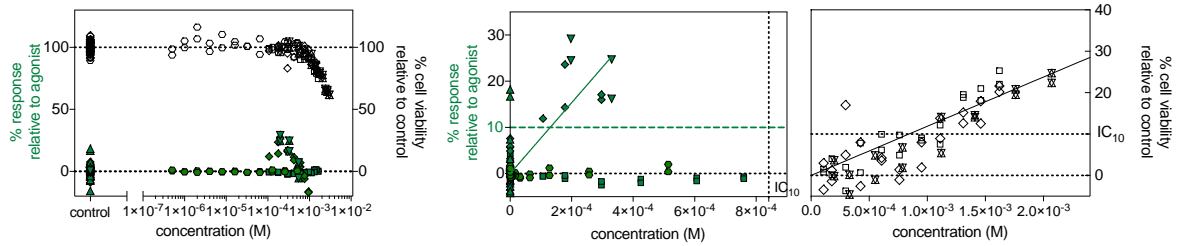

**Figure S15.** Concentration-cytotoxicity and concentration-effect relationships of the environmental chemicals in PR-BLA.

On the left plot are all data plotted on a logarithmic concentration scale with the percent response relative to the maximum effect represented in green filled symbols (left y-axis) and the cytotoxicity in empty black-rimmed symbols (right y-axis). Different symbols refer to different independent experiments. On the right are only experimental cytotoxicity data depicted that are in the linear portion of the concentration-cytotoxicity relationship (solid line) up to 40% cytotoxicity (=100% - % cell viability), from which the  $IC_{10}$  is derived (10% effect level marked by a dotted line). In the middle plot are only experimental effect data in the linear portion of the concentration-effect relationship, from which the  $EC_{10}$  is derived (10% effect level marked by a dotted horizontal line);  $IC_{10}$ , which is normally the cut-off for evaluation of reporter gene activation, marked by a vertical dotted line.

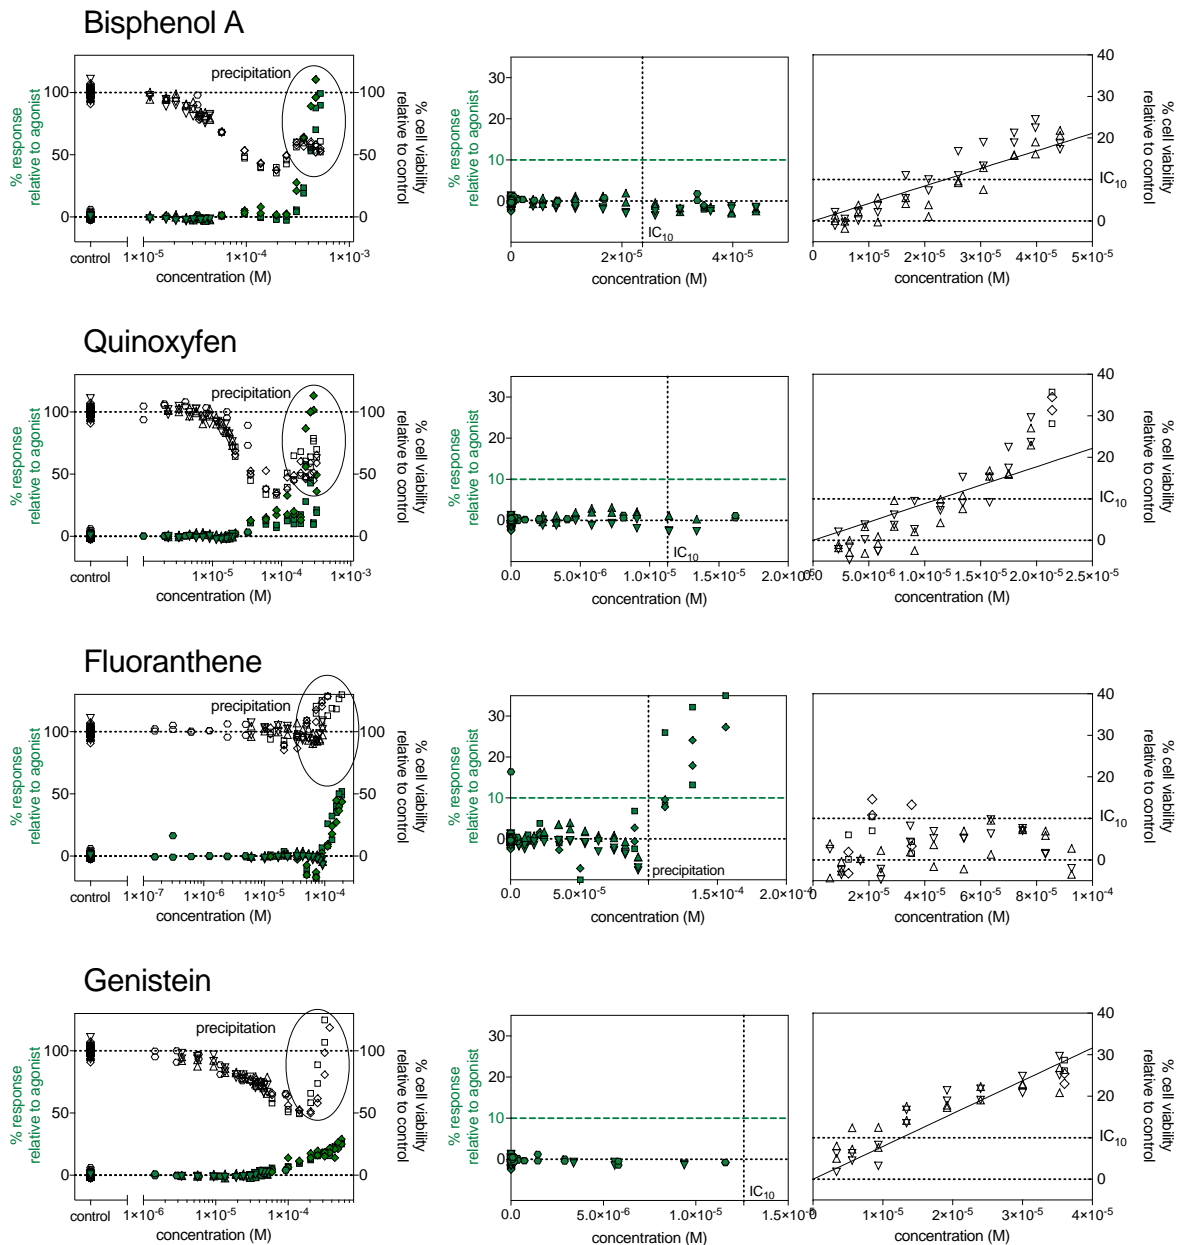

### Coumarin

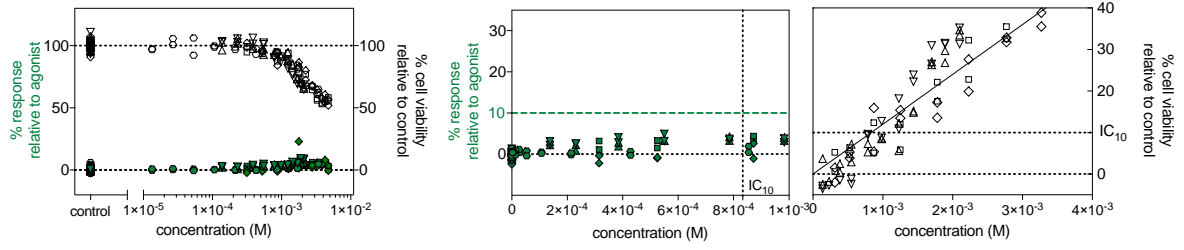

### Gingerol

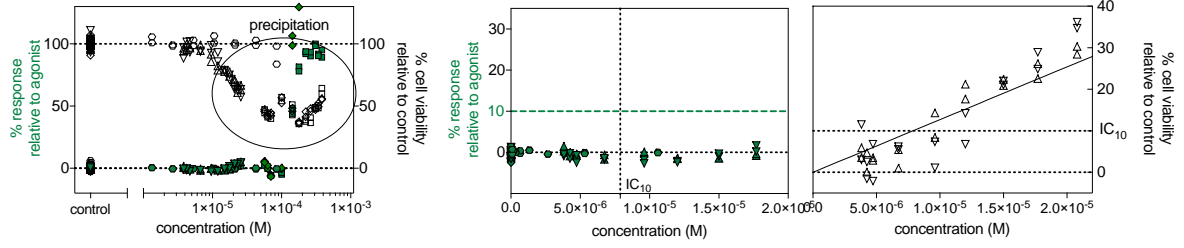

### Zingerone

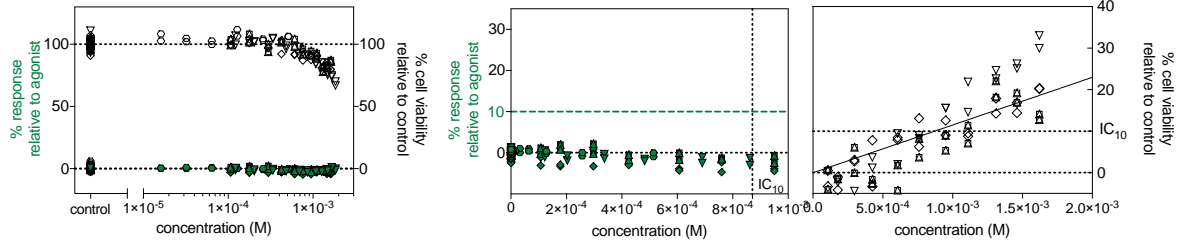



**Figure S16.** Concentration-cytotoxicity and concentration-effect relationships of the environmental chemicals in GR-BLA.

On the left plot are all data plotted on a logarithmic concentration scale with the percent response relative to the maximum effect represented in green filled symbols (left y-axis) and the cytotoxicity in empty black-rimmed symbols (right y-axis). Different symbols refer to different independent experiments. On the right are only experimental cytotoxicity data depicted that are in the linear portion of the concentration-cytotoxicity relationship (solid line) up to 40% cytotoxicity (=100% - % cell viability), from which the  $IC_{10}$  is derived (10% effect level marked by a dotted line). In the middle plot are only experimental effect data in the linear portion of the concentration-effect relationship, from which the  $EC_{10}$  is derived (10% effect level marked by a dotted horizontal line);  $IC_{10}$ , which is normally the cut-off for evaluation of reporter gene activation, marked by a vertical dotted line.

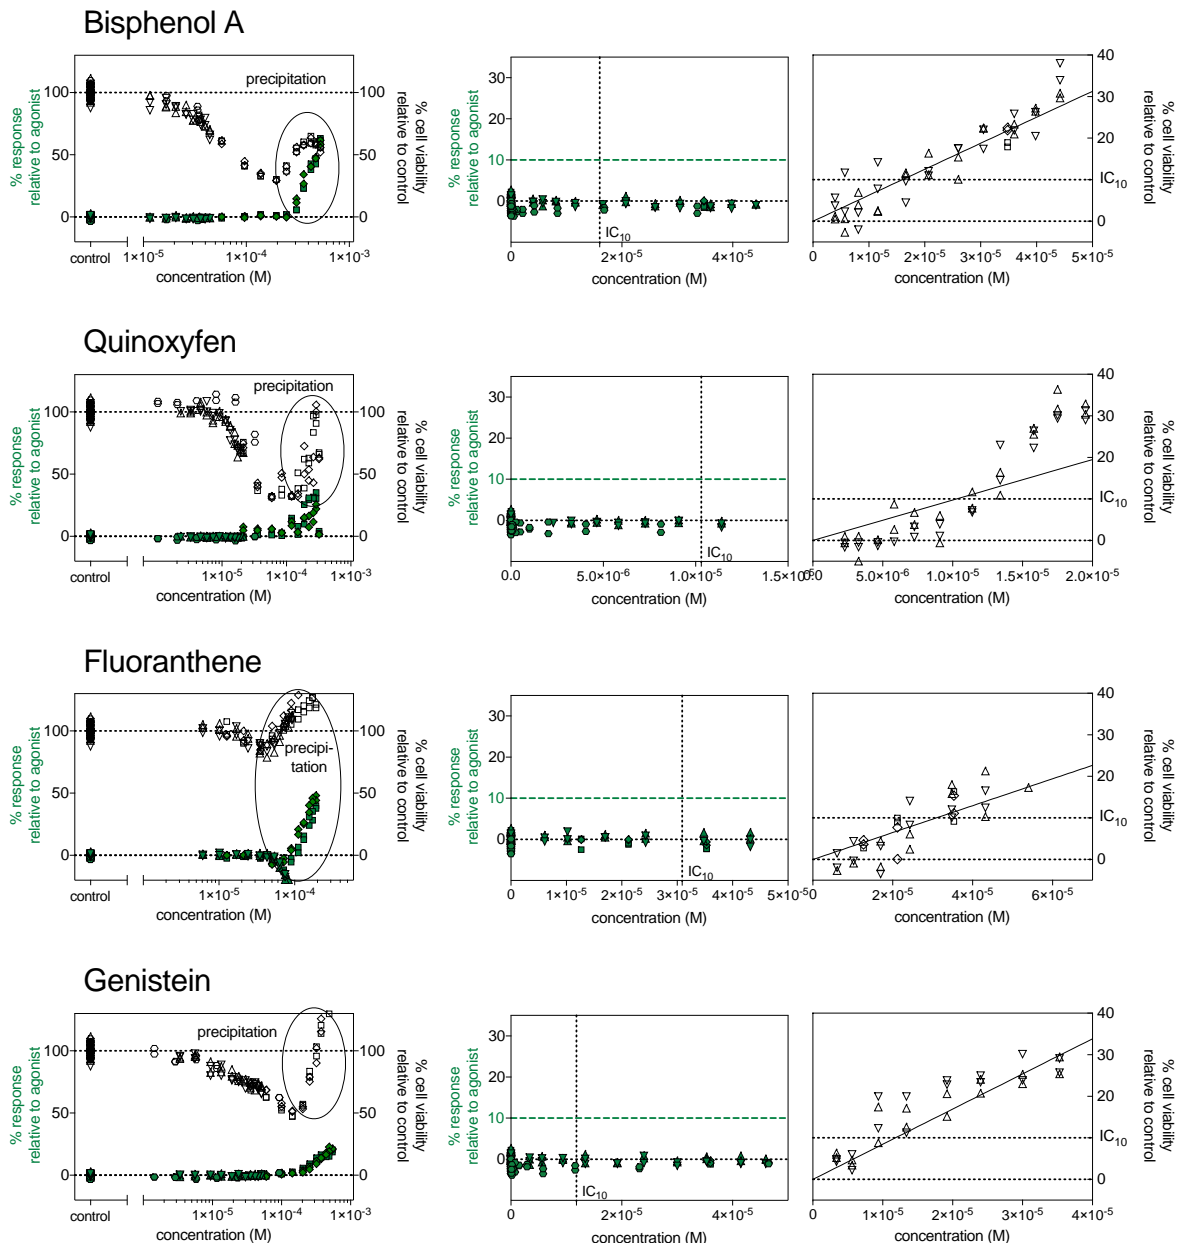

### Coumarin

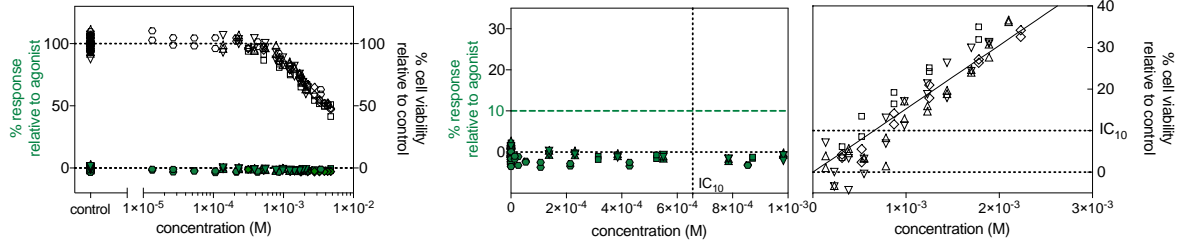

### 8-Gingerol

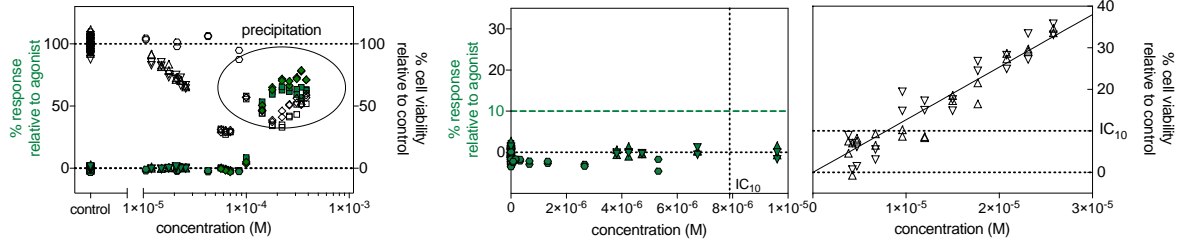

### Zingerone

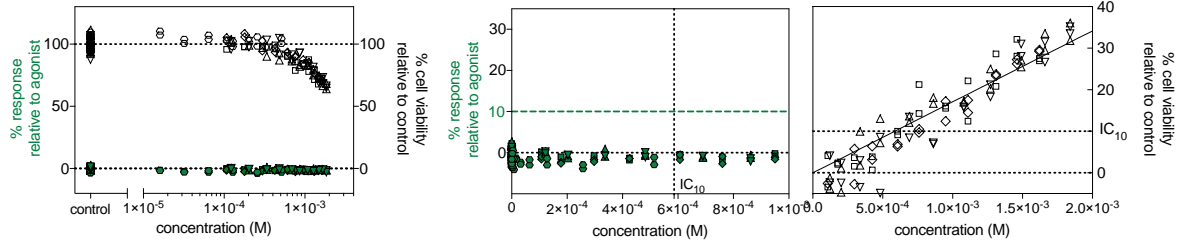

**Figure S17.** Cytotoxicity of the additional seven chemicals in relation to the Quantitative Structure Activity Relationships (QSAR) for baseline toxicity for all cell lines.

The colored symbols with chemicals' names are the additional chemicals. The black diamonds are the experimental data of the baseline toxicants from (Escher et al. 2019), the solid lines correspond to the best fit. The QSARs equations from (Escher et al. 2019) are reprinted in Table 1. Abbreviations: AhR, arylhydrocarbon receptor; AR, androgen receptor; ARE, Antioxidant response element; BLA, GeneBLazer reporter gene cell line, CALUX, Chemical Activated Luciferase gene eXpression; ER, estrogen receptor; GR, glucocorticoid receptor, PPAR $\gamma$ , peroxisome proliferator activated receptor gamma; PR, progesterone receptor.

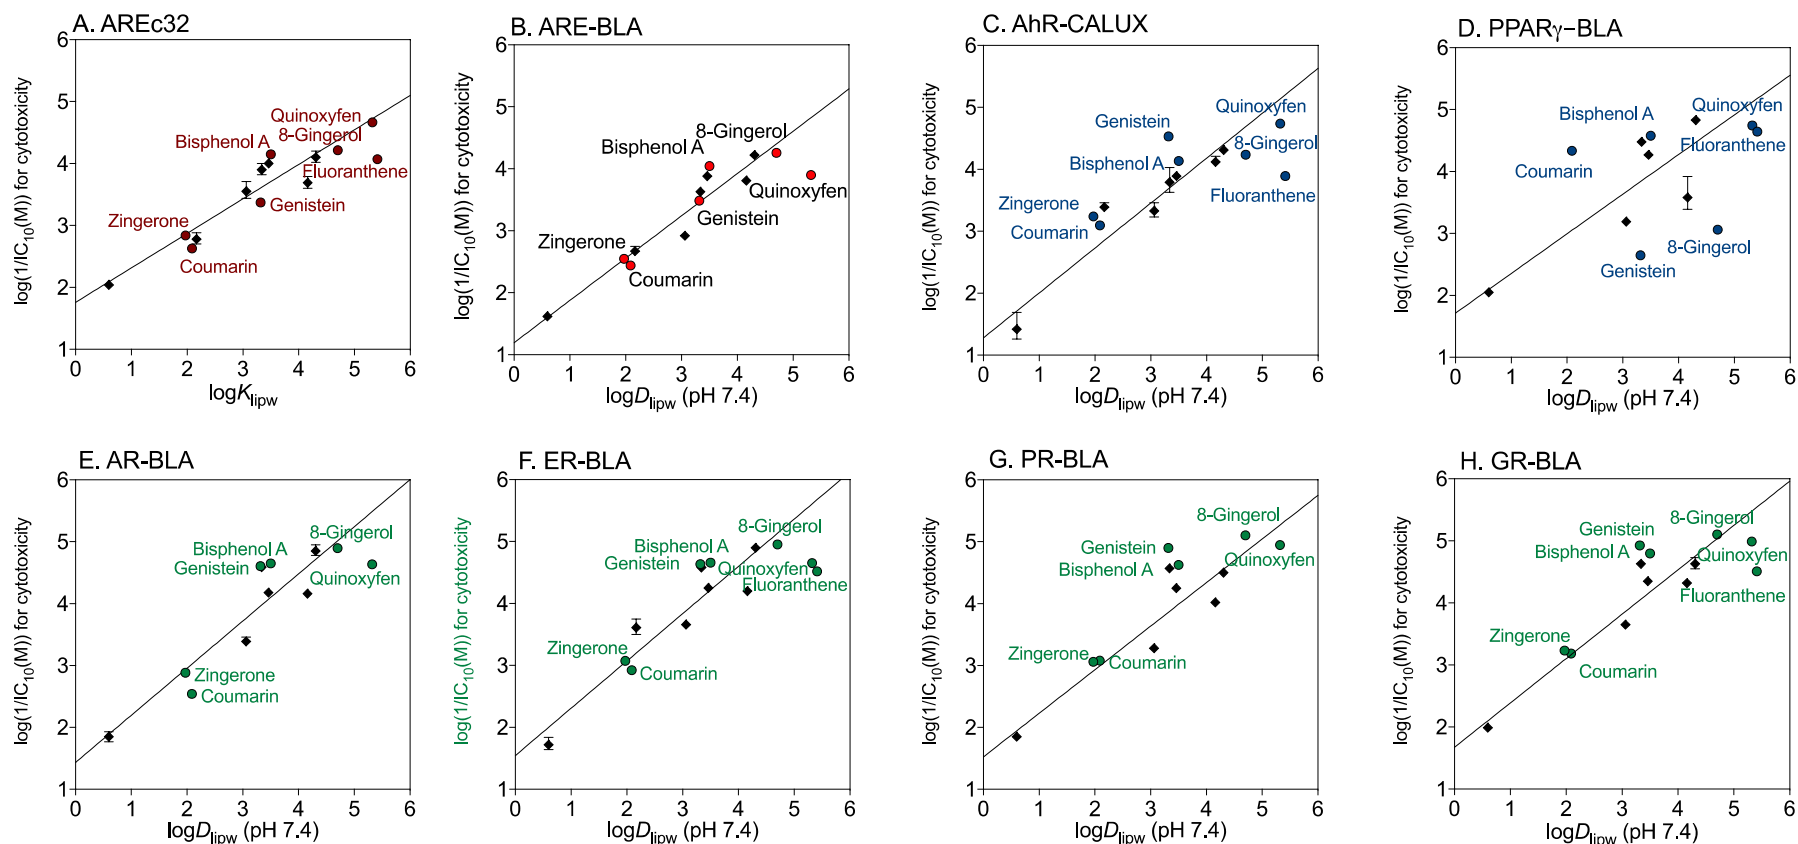

**Figure S18.** Workflow for the analysis of the Tox21 data.

Abbreviations:  $D_{lip/w}$  (pH 7.4), ionization-corrected liposome-water distribution ratio;  $EC_{10}$ , effect concentration, leading to 10% effect;  $IC_{10}$ , inhibitory concentration, leading to 10% reduction in cell viability;  $K_{lip/w}$ , liposome-water partition constant; QSAR, Quantitative Structure Activity Relationship;  $SR_{cytotoxicity}$ , Specificity ratio in relation to experimental cytotoxicity;  $SR_{baseline}$ , Specificity ratio in relation to baseline cytotoxicity.

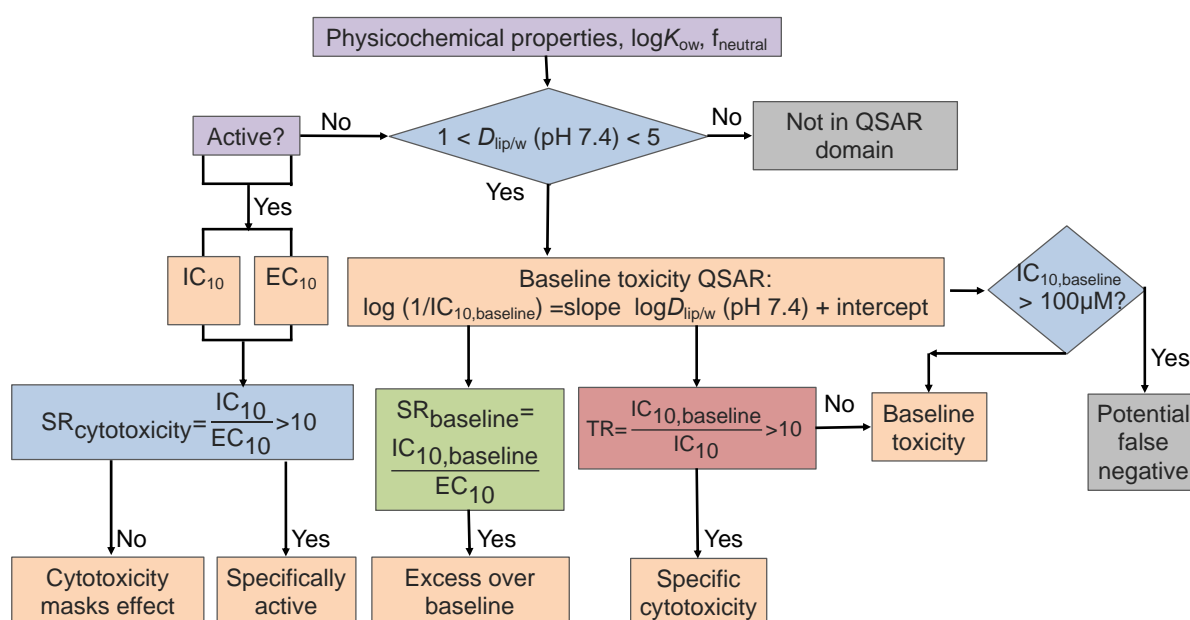

**Figure S19.** Cytotoxicity of the seven environmental chemicals (Bisphenol A, Quinoxifen, Fluoranthene, Genistein, Coumarin, 8-Gingerol, Zingerone) in relation to the QSARs for baseline toxicity for all cell lines.

The colored symbols with chemicals' names are the additional chemicals. The black diamonds are the experimental data of the baseline toxicants from (Escher et al. 2019), the solid lines correspond to the best fit. The QSARs equations from (Escher et al. 2019) are reprinted in Table 1.

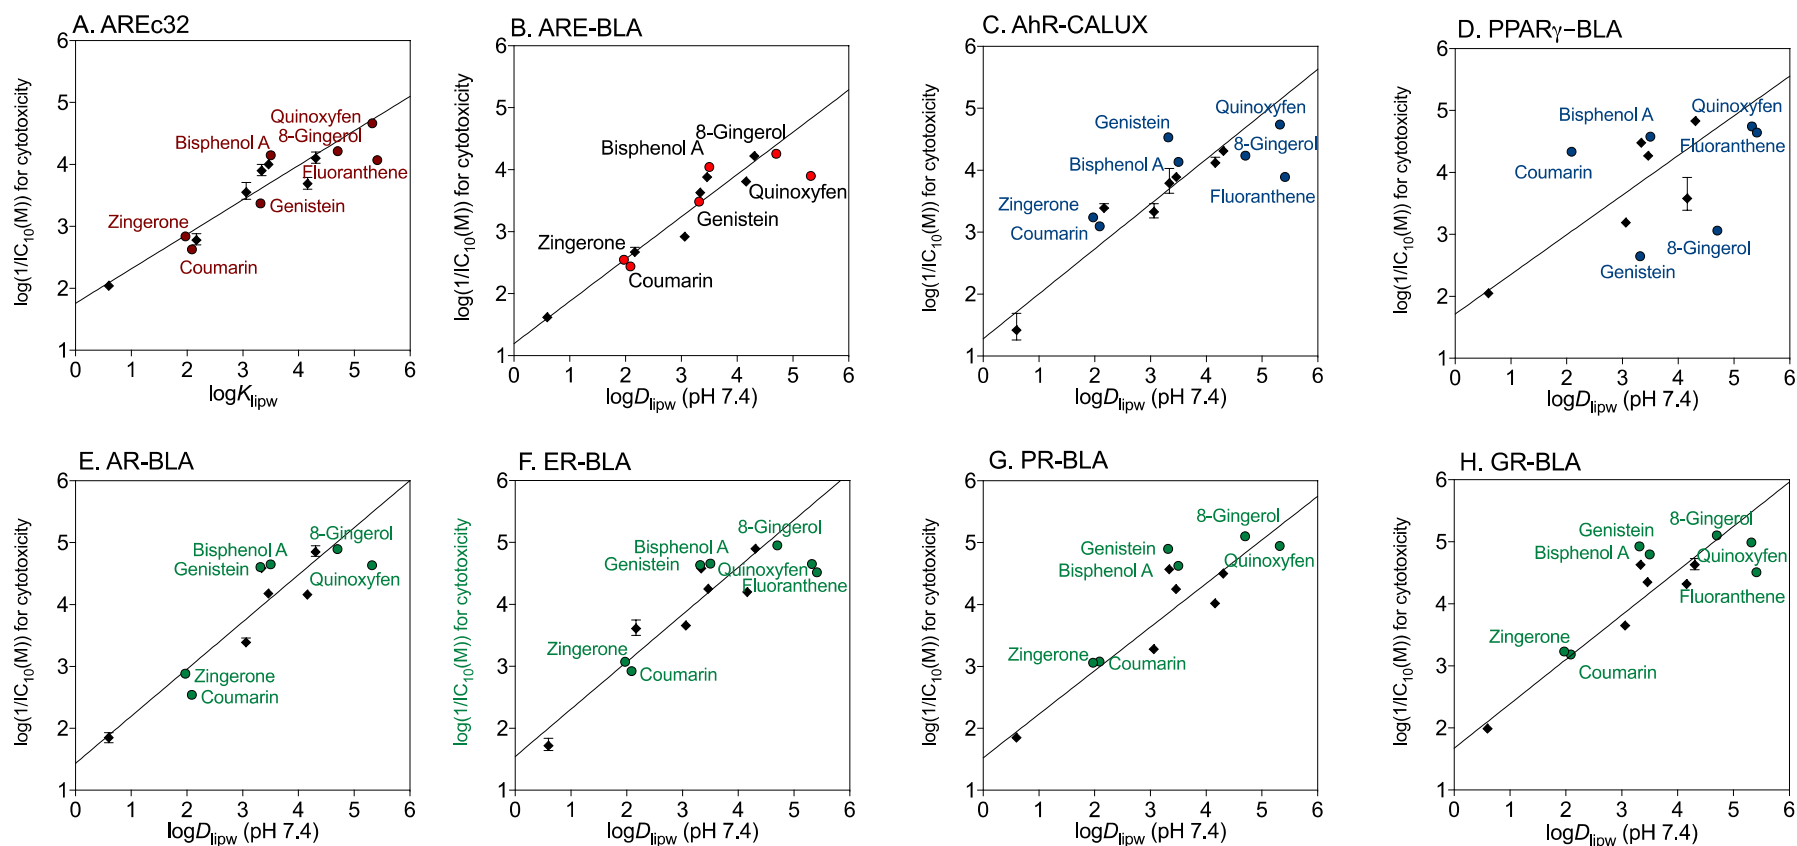

**Figure S20.** Comparison of the toxic ratio (TR) analysis of the entire dataset (legend “all”, data from Figure 4A) in comparison to the two subsets of neutral ( $f_{\text{neutral}} > 98\%$ ) and (partially) charged ( $f_{\text{neutral}} < 98\%$ ) chemicals.

The underlying data are in the EXCEL Tables S1 to S6. The number of chemicals  $n$  for which a TR could be derived  $n(\text{TR})$  is given in the top row. The percentages in the top refer to all data with  $\text{TR} > 10$  (black diamond symbols), the percentages in the bottom refer to all data with  $\text{TR} \leq 10$  (red circle symbols).

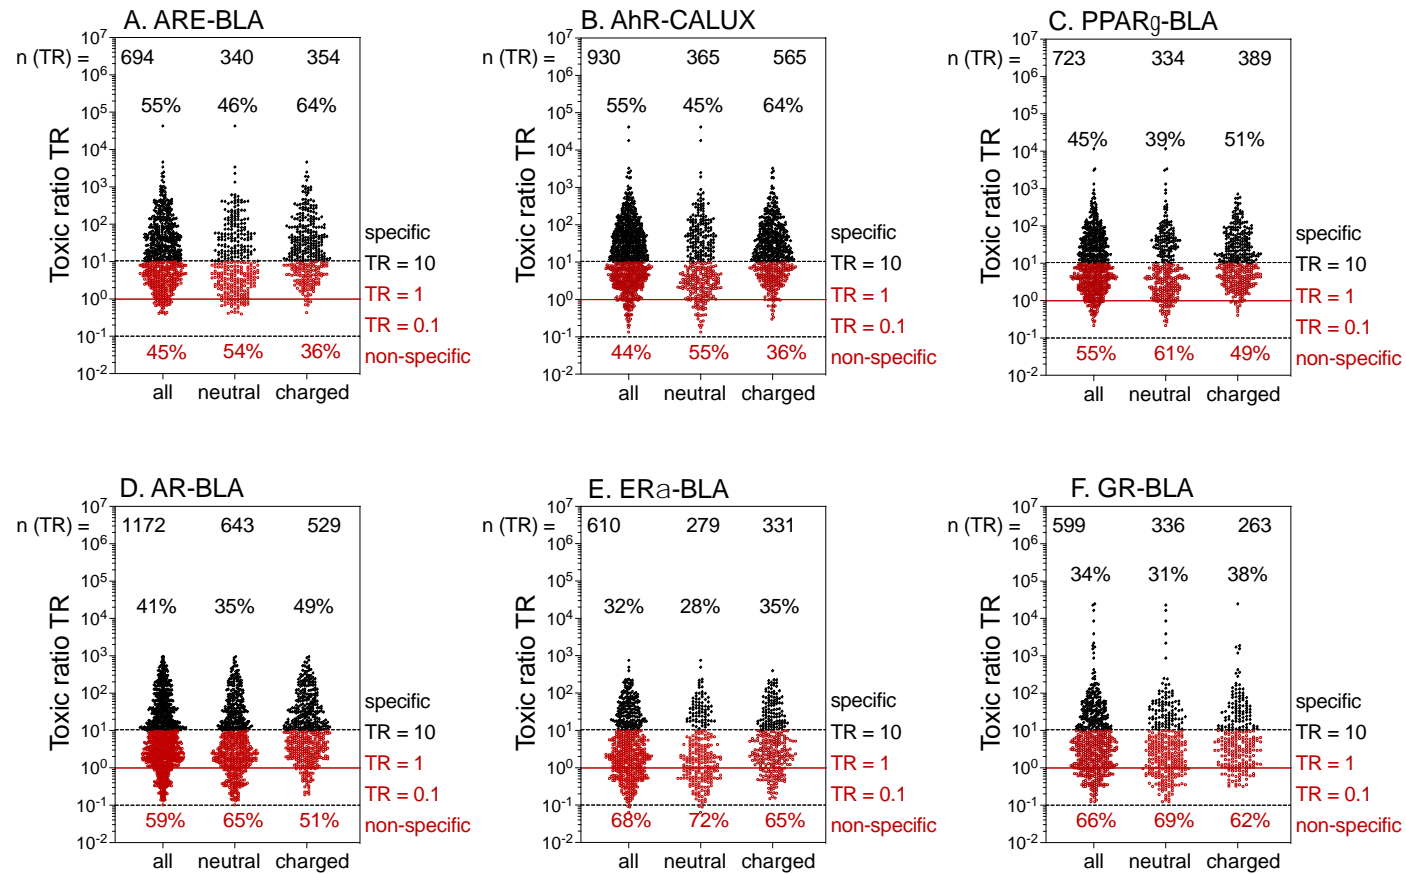

**Figure S21.** Comparison  $EC_{10}$  derived from the results of the individual Tox21 laboratories (black dots) compared to the joint data evaluation of all data (red diamonds) of a given chemical in this study. Selected examples are depicted for  $ER\alpha$ -BLA. They demonstrate that the joint evaluation is reasonable.

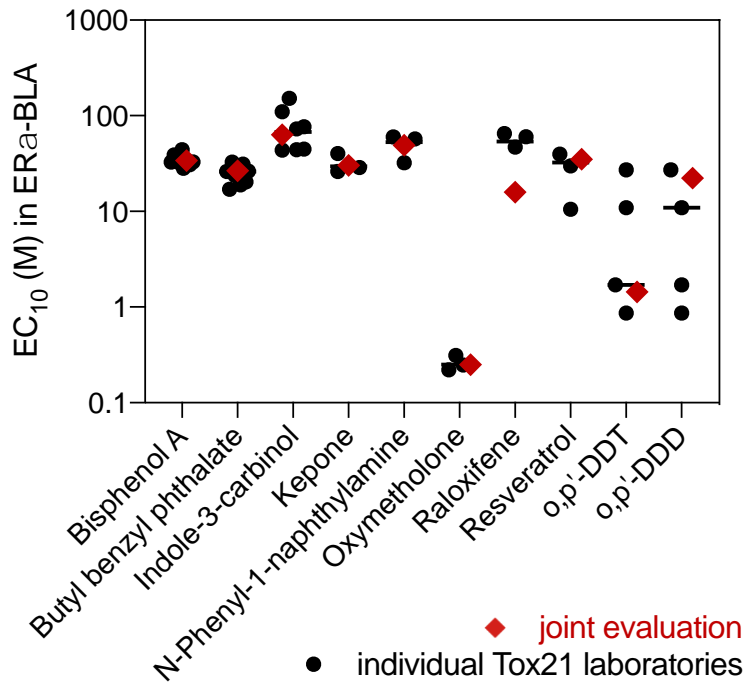

**Figure S22.** Comparison between the  $IC_{10}/EC_{10}$  values measured in the present study and the corresponding chemicals/assays in Tox21.

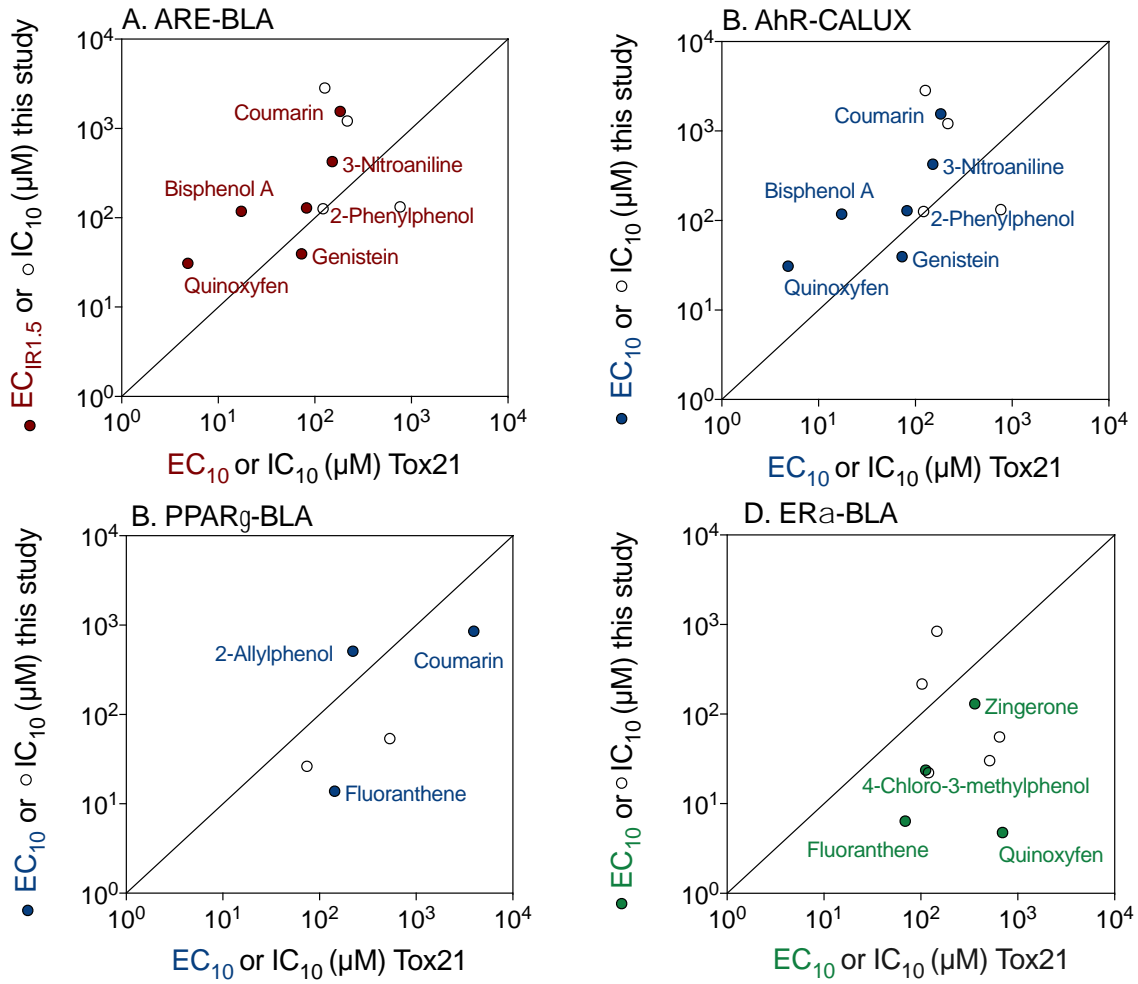

**Figure S23.** Ratio between the  $IC_{10}$  and  $EC_{10}$  values measured in the present study and the corresponding chemicals/assays in Tox21.

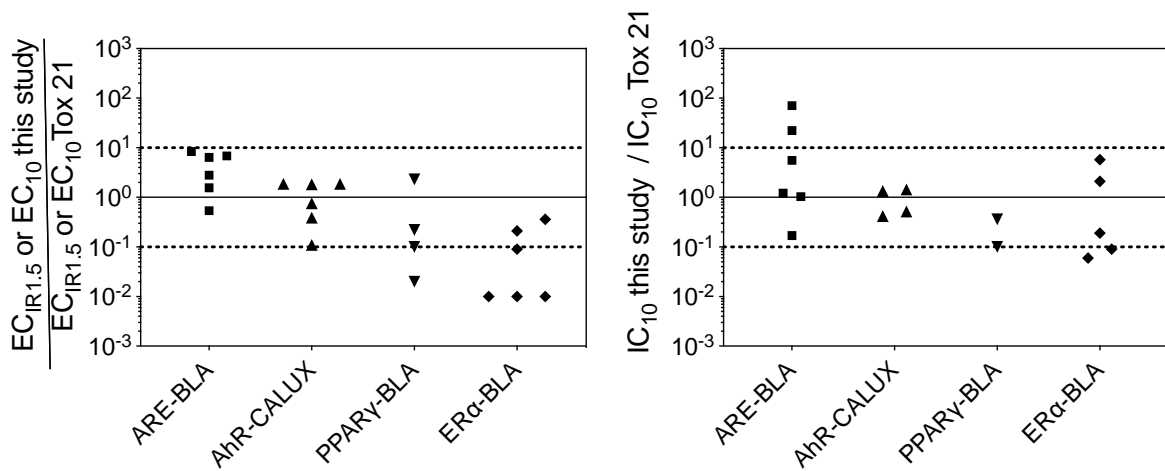



## References

- Escher B, Neale PA, Villeneuve D. 2018. The advantages of linear concentration-response curves for *in vitro* bioassays with environmental samples. *Environ Toxicol Chem* 37:2273–2280.
- Escher BI, Glauch L, König M, Mayer P, Schlichting R. 2019. Baseline toxicity and volatility cut-off in reporter gene assays used for high-throughput screening. *Chem Res Toxicol* 32:1646-1655.
- Henneberger L, Mühlenbrink M, Fischer FC, Escher BI. 2019. C18-coated solid-phase microextraction fibers for the quantification of partitioning of organic acids to proteins, lipids, and cells. *Chem Res Toxicol* 32:168 - 178.
- Henneberger L, Mühlenbrink M, Heinrich D, Teixeira A, Nicol B, Escher BI. 2020. Experimental validation of mass balance models for *in vitro* cell-based bioassays. *Environmental Science and Technology*:submitted Nov 2019.
- Kwon JH, Liljestrand HM, Katz LE. 2006. Partitioning of moderately hydrophobic endocrine disruptors between water and synthetic membrane vesicles. *Environ Toxicol Chem* 25:1984-1992.
- Vaes WHJ, Ramos EU, Hamwijk C, vanHolsteijn I, Blaauboer BJ, Seinen W, et al. 1997. Solid phase microextraction as a tool to determine membrane/water partition coefficients and bioavailable concentrations in *in vitro* systems. *Chem Res Toxicol* 10:1067-1072.
- van der Heijden SA, Jonker MTO. 2009. Evaluation of liposome-water partitioning for predicting bioaccumulation potential of hydrophobic organic chemicals. *Environ Sci Technol* 43:8854-8859.
