# Supplementary material
Source: PubMed Central journal article supplement (PMC7377237)
Supplement: ehp6664.smcontents.508.pdf [file ehp6664.smcontents.508.pdf]

**Note to readers with disabilities:** *EHP* strives to ensure that all journal content is accessible to all readers. However, some figures and Supplemental Material published in *EHP* articles may not conform to [508 standards](#) due to the complexity of the information being presented. If you need assistance accessing journal content, please contact [ehp508@niehs.nih.gov](mailto:ehp508@niehs.nih.gov). Our staff will work with you to assess and meet your accessibility needs within 3 working days.

### **Supplemental Material**

#### **Cytotoxicity Burst? Differentiating Specific from Nonspecific Effects in Tox21 *in Vitro* Reporter Gene Assays**

Beate I. Escher, Luise Henneberger, Maria König, Rita Schlichting, and Fabian C. Fischer

#### **Table of Contents**

**Text S1.** MATLAB code 1: Processing and sorting of Tox21 concentration-response browser data.

**Text S2.** MATLAB code 2: Calculation of IC<sub>10</sub> and EC<sub>10</sub> from the Tox21 concentration-response data.

**Table S1.** Additional information on test chemicals.

**Table S2.** Analysis of the specific effects of the baseline toxicants in AREc32.

**Table S3.** Analysis of the specific effects of the baseline toxicants in ARE-BLA.

**Table S4.** Analysis of the specific effects of the baseline toxicants in AhR-CALUX.

**Table S5.** Analysis of the specific effects of the baseline toxicants in PPAR $\gamma$ -BLA.

**Table S6.** Analysis of the specific effects of the baseline toxicants in AR-BLA.

**Table S7.** Analysis of the specific effects of the baseline toxicants in ER $\alpha$ -BLA.

**Table S8.** Analysis of the specific effects of the baseline toxicants in PR-BLA.

**Table S9.** Analysis of the specific effects of the baseline toxicants in GR-BLA.

**Table S10.** Analysis of the specific effects of the environmental chemicals in AREc32.

**Table S11.** Analysis of the specific effects of the environmental chemicals in ARE-BLA.

**Table S12.** Analysis of the specific effects of the environmental chemicals in AhR-CALUX.

**Table S13.** Analysis of the specific effects of the environmental chemicals in PPAR $\gamma$ -BLA.

**Table S14.** Analysis of the specific effects of the environmental chemicals in AR-BLA.

**Table S15.** Analysis of the specific effects of the environmental chemicals in ER $\alpha$ -BLA.

**Table S16.** Analysis of the specific effects of the environmental chemicals in PR-BLA.

**Table S17.** Analysis of the specific effects of the environmental chemicals in GR-BLA.

**Table S18.** Analysis given in Table 2 split into the two subsets of neutral ( $f_{\text{neutral}} > 98\%$ ) and (partially) charged ( $f_{\text{neutral}} < 98\%$ ) chemicals.

**Figure S1.** Concentration-cytotoxicity and concentration-effect relationships of the confirmed baseline toxicants in AREc32.

**Figure S2.** Concentration-cytotoxicity and concentration-effect relationships of the confirmed baseline toxicants in ARE-BLA.

**Figure S3.** Concentration-cytotoxicity and concentration-effect relationships of the confirmed baseline toxicants in AhR-CALUX.

**Figure S4.** Concentration-cytotoxicity and concentration-effect relationships of the confirmed baseline toxicants in PPAR $\gamma$ -BLA.

**Figure S5.** Concentration-cytotoxicity and concentration-effect relationships of the confirmed baseline toxicants in AR-BLA.

**Figure S6.** Concentration-cytotoxicity and concentration-effect relationships of the confirmed baseline toxicants in ER $\alpha$ -BLA.

**Figure S7.** Concentration-cytotoxicity and concentration-effect relationships of the confirmed baseline toxicants in PR-BLA.

**Figure S8.** Concentration-cytotoxicity and concentration-effect relationships of the confirmed baseline toxicants in GR-BLA.

**Figure S9.** Concentration-cytotoxicity and concentration-effect relationships of the environmental chemicals in AREc32.

**Figure S10.** Concentration-cytotoxicity and concentration-effect relationships of the environmental chemicals in ARE-BLA.

**Figure S11.** Concentration-cytotoxicity and concentration-effect relationships of the environmental chemicals in AhR-CALUX.

**Figure S12.** Concentration-cytotoxicity and concentration-effect relationships of the environmental chemicals in PPAR $\gamma$ -BLA.

**Figure S13.** Concentration-cytotoxicity and concentration-effect relationships of the environmental chemicals in AR-BLA.

**Figure S14.** Concentration-cytotoxicity and concentration-effect relationships of the environmental chemicals in ER $\alpha$ -BLA.

**Figure S15.** Concentration-cytotoxicity and concentration-effect relationships of the environmental chemicals in PR-BLA.

**Figure S16.** Concentration-cytotoxicity and concentration-effect relationships of the environmental chemicals in GR-BLA.

**Figure S17.** Cytotoxicity of the additional seven chemicals in relation to the Quantitative Structure Activity Relationships (QSAR) for baseline toxicity for all cell lines.

**Figure S18.** Workflow for the analysis of the Tox21 data.

**Figure S19.** Cytotoxicity of the seven environmental chemicals (Bisphenol A, Quinoxifen, Fluoranthene, Genistein, Coumarin, 8-Gingerol, Zingerone) in relation to the QSARs for baseline toxicity for all cell lines.

**Figure S20.** Comparison of the toxic ratio (TR) analysis of the entire dataset (legend “all”, data from Figure 4A) in comparison to the two subsets of neutral ( $f_{\text{neutral}} > 98\%$ ) and (partially) charged ( $f_{\text{neutral}} < 98\%$ ) chemicals.

**Figure S21.** Comparison EC<sub>10</sub> derived from the results of the individual Tox21 laboratories (black dots) compared to the joint data evaluation of all data (red diamonds) of a given chemical in this study. Selected examples are depicted for ER $\alpha$ -BLA. They demonstrate that the joint evaluation is reasonable.

**Figure S22.** Comparison between the IC<sub>10</sub>/EC<sub>10</sub> values measured in the present study and the corresponding chemicals/assays in Tox21.

**Figure S23.** Ratio between the IC<sub>10</sub> and EC<sub>10</sub> values measured in the present study and the corresponding chemicals/assays in Tox21.

## References

**Additional File-** Excel Document
